# Supplementary material for: Complex rearrangements and oncogene amplifications revealed by long-read DNA and RNA sequencing of a breast cancer cell line
Source: HighWire-hosted journal article supplement (doi:10.1101/gr.231100.117), 2018-06-28
Supplement: Supplemental_Table5_Variant_Call_Summary.xlsx [file Supplemental_Table5_Variant_Call_Summary.xlsx]

## Sheet: Sheet1
Supplemental Table 5. Variant Call Summary
Method	Read Type	Total	DEL	DUP	INS	INV	TRA
Delly	short reads	5941	2868	589	76	939	1469
Lumpy	short reads	5410	2541	431	0	1120	1318
Manta	short reads	11702	6901	859	507	957	2478
PopIns	short reads	579	0	0	579	0	0
SURVIVOR_min2	short reads	4189	2481	448	77	580	603
Sniffles	long reads	17313	6947	1018	8909	279	160
