# Supplementary material for: Complex rearrangements and oncogene amplifications revealed by long-read DNA and RNA sequencing of a breast cancer cell line
Source: HighWire-hosted journal article supplement (doi:10.1101/gr.231100.117), 2018-06-28
Supplement: Supplemental_Table6.xlsx [file Supplemental_Table6.xlsx]

## Sheet: Sniffles call-set
Supplementary Table 7. Long Range Variants detected by Sniffles
Chrom1	Pos1	Chrom2	Pos2	Strand1	Strand2	Type	Number of split reads	Size
1	724444	1	224201774	-	+	DUP	16	223477330
1	2634221	1	2687903	+	-	DEL	23	53682
1	9887317	1	40494648	+	-	DEL	23	30607331
1	17007337	1	145382659	-	+	DUP	12	128375322
1	17051739	1	234912188	-	-	INV	44	217860449
1	29878082	1	31129333	+	+	INV	19	1251251
1	55054999	1	56060852	+	-	DEL	19	1005853
1	72766325	1	72811840	+	-	DEL	18	45515
1	110227751	1	110246214	+	-	DEL	10	18463
1	112691790	1	112704704	+	-	DEL	34	12914
1	120532897	1	145288017	-	-	INV	22	24755120
1	120630580	1	145080163	+	+	INV	31	24449583
1	120696517	1	145118880	+	+	INV	11	24422363
1	120752656	1	143999795	-	-	INV	21	23247139
1	144019574	1	206482356	+	-	DEL	18	62462782
1	144526546	1	149203683	-	-	INV	28	4677137
1	144680040	1	144954615	-	+	DUP	10	274575
1	144710527	1	144985942	+	-	DEL	10	275415
1	144896298	1	144906806	+	-	DEL	47	10508
1	145080163	1	145189463	+	-	DEL	14	109300
1	145124807	1	145183392	+	-	DEL	17	58585
1	152555543	1	152587740	+	-	DEL	28	32197
1	152759686	1	152770193	+	-	DEL	17	10507
1	152760759	1	152771253	+	-	DEL	22	10494
1	161562194	1	161644030	+	-	DEL	10	81836
1	168186186	1	182274316	-	-	INV	11	14088130
1	227681538	1	227695188	-	-	INV	12	13650
1	247291207	1	247333838	+	+	INV	12	42631
2	4212676	2	4223478	+	-	DEL	11	10802
2	21153113	2	21178114	+	-	DEL	25	25001
2	35975641	2	35996823	+	-	DEL	19	21182
2	97860235	2	98162555	-	-	INV	12	302320
2	110109338	2	110251338	+	-	DEL	32	142000
2	146862621	2	146876864	+	-	DEL	17	14243
3	60000	3	75279194	-	+	DUP	13	75219194
3	3852722	3	26060890	+	-	DEL	18	22208168
3	4363455	3	37183394	-	+	DUP	44	32819939
3	8043414	3	169055741	+	-	DEL	53	161012327
3	13022061	3	16012605	-	-	INV	24	2990544
3	13567042	3	140850282	+	+	INV	20	127283240
3	14309080	3	165502777	+	+	INV	19	151193697
3	15998972	3	36719420	-	-	INV	49	20720448
3	16007495	3	16856692	+	-	DEL	41	849197
3	16007543	3	17182374	-	+	DUP	56	1174831
3	16012561	3	39603194	+	+	INV	52	23590633
3	16214249	3	152145861	+	-	DEL	35	135931612
3	16388248	3	18874271	-	-	INV	25	2486023
3	25161539	3	156817237	+	+	INV	20	131655698
3	26411248	3	27200496	+	-	DEL	17	789248
3	36564264	3	190544919	+	-	DEL	24	153980655
3	37948493	3	151639854	-	+	DUP	75	113691361
3	37960424	3	38362612	+	+	INV	18	402188
3	37960705	3	37979594	-	+	DUP	24	18889
3	37979114	3	38340261	-	+	DUP	24	361147
3	38361893	3	151629554	-	+	DUP	19	113267661
3	52305731	3	52697436	+	-	DEL	19	391705
3	65188871	3	65214750	+	-	DEL	40	25879
3	99111518	3	99150621	+	-	DEL	32	39103
3	138976393	3	141368500	-	+	DUP	27	2392107
3	142206653	3	177996255	+	-	DEL	16	35789602
3	151072015	3	151075315	-	-	INVDUP	30	3300
3	158184651	3	190426486	-	+	DUP	23	32241835
3	162525742	3	162547643	+	+	INV	19	21901
3	162525742	3	162545362	+	-	DEL	22	19620
3	173239274	3	173290864	-	+	DUP	35	51590
3	180457894	3	184376869	-	-	INV	10	3918975
3	180819658	3	191797981	+	-	DEL	25	10978323
3	183303327	3	187051868	-	+	DUP	14	3748541
3	183856770	3	187735745	+	+	INV	20	3878975
3	187053384	3	192273116	-	+	DUP	21	5219732
3	187053844	3	191590673	+	+	INV	20	4536829
3	187131533	3	187146604	+	+	INV	17	15071
3	187318486	3	192537624	-	-	INV	17	5219138
3	188604216	3	190967314	-	+	DUP	23	2363098
3	191703494	3	192536779	-	+	DUP	20	833285
3	192536233	3	193003510	-	+	DUP	23	467277
3	192875331	3	192885408	+	-	DEL	37	10077
3	195457510	3	195471261	+	-	DEL	14	13751
4	8799204	4	8818203	+	-	DEL	16	18999
4	20218663	4	20238706	+	-	DEL	14	20043
4	40360310	4	40409129	+	-	DEL	15	48819
4	58540643	4	58541204	+	+	INVDUP	18	561
4	64694328	4	64714383	+	-	DEL	24	20055
4	92044368	4	92142259	+	-	DEL	32	97891
4	104203392	4	105923511	+	-	DEL	24	1720119
4	116166907	4	116177180	+	-	DEL	35	10273
4	170632505	4	170768474	+	-	DEL	15	135969
5	14441479	5	15603771	+	-	DEL	19	1162292
5	140222137	5	140238932	+	-	DEL	58	16795
5	142224019	5	163296424	+	-	DEL	11	21072405
5	147787179	5	154760494	-	+	DUP	25	6973315
5	147822879	5	154739906	+	-	DEL	16	6917027
5	147824625	5	154483426	-	-	INV	10	6658801
5	147824624	5	154484281	-	+	DUP	10	6659657
5	147868347	5	157896239	+	-	DEL	17	10027892
5	147938622	5	157897089	-	+	DUP	10	9958467
5	148134916	5	154722865	+	-	DEL	21	6587949
5	154325257	5	157746040	-	-	INV	18	3420783
5	154473455	5	157844227	-	-	INV	22	3370772
5	154481356	5	154759920	+	-	DEL	24	278564
5	154483426	5	158308574	-	+	DUP	10	3825148
5	157701690	5	158241042	-	+	DUP	16	539352
5	157704613	5	158440546	+	-	DEL	16	735933
5	157736150	5	158712494	+	-	DEL	23	976344
5	157758347	5	158295162	-	-	INV	22	536815
5	157843881	5	157891762	+	-	DEL	14	47881
5	157863984	5	158706384	+	-	DEL	20	842400
5	157891766	5	158230078	-	-	INV	11	338312
5	157895854	5	158230079	+	-	DEL	14	334225
5	158707342	5	158719239	+	+	INV	22	11897
5	170260691	5	178183133	-	+	DUP	13	7922442
5	170261227	5	178183120	+	-	DEL	13	7921893
5	179064381	5	179082161	-	-	INV	27	17780
5	180375019	5	180430524	+	-	DEL	17	55505
5	180376288	5	180431791	+	-	DEL	10	55503
6	1518608	6	1837177	-	-	INV	37	318569
6	1621296	6	3631622	+	-	DEL	33	2010326
6	2028990	6	14388825	+	-	DEL	43	12359835
6	3634590	6	14361284	+	+	INV	37	10726694
6	6709311	6	8439527	-	-	INV	34	1730216
6	7470266	6	7609078	-	-	INV	44	138812
6	7549972	6	8238467	+	+	INV	30	688495
6	7596601	6	8269006	-	-	INV	37	672405
6	7608881	6	7653564	+	+	INV	38	44683
6	7770188	6	8440214	-	+	DUP	31	670026
6	8270112	6	8775450	+	-	DEL	29	505338
6	26025973	6	26301450	+	-	DEL	12	275477
6	26726863	6	26750498	+	-	DEL	12	23635
6	26762089	6	26762266	+	+	INVDUP	16	177
6	26762082	6	26762268	+	+	INVDUP	10	186
6	27623533	6	27714684	+	-	DEL	18	91151
6	27784640	6	34262554	+	+	INV	19	6477914
6	30912586	6	32390742	+	-	DEL	21	1478156
6	32450721	6	32538479	+	-	DEL	15	87758
6	32452982	6	32539039	+	-	DEL	12	86057
6	32454686	6	32541302	+	-	DEL	22	86616
6	32455141	6	32558645	-	+	DUP	10	103504
6	32491475	6	32527494	-	+	DUP	11	36019
6	32523375	6	32550247	+	-	DEL	10	26872
6	35754560	6	35766787	-	+	DUP	21	12227
6	157559467	6	157641301	+	+	INV	27	81834
7	6242602	7	6249000	+	+	INVDUP	10	6398
7	52730071	7	52745255	-	+	DUP	88	15184
7	54376580	7	54388718	+	-	DEL	15	12138
7	62146493	7	62162870	+	-	DEL	19	16377
7	62825540	7	62843124	+	+	INV	12	17584
7	70420969	7	70438888	+	+	INV	48	17919
7	70426185	7	70438880	-	-	INV	48	12695
7	76144773	7	76676045	+	-	DEL	13	531272
7	76450649	7	76463778	-	+	DUP	22	13129
7	100554619	7	100606043	+	-	DEL	18	51424
7	100556043	7	100607262	+	-	DEL	22	51219
7	109436689	7	109453901	+	-	DEL	56	17212
7	112616129	7	113133596	-	+	DUP	10	517467
7	112621338	7	113138891	+	-	DEL	13	517553
7	114049421	7	114652989	+	+	INV	62	603568
7	114105280	7	114182529	+	-	DEL	50	77249
7	117034559	7	129149007	+	-	DEL	97	12114448
7	117142893	7	131651806	-	+	DUP	113	14508913
7	128582025	7	128583729	+	+	INVDUP	30	1704
7	141765977	7	141794991	+	-	DEL	22	29014
7	149700534	7	153790551	-	-	INV	10	4090017
5	147834951	5	157891579	+	+	INV	22	10056628
5	148007935	5	154748580	+	-	DEL	18	6740645
8	24972434	8	24990947	+	-	DEL	21	18513
8	32680005	8	32691265	+	-	DEL	25	11260
8	47893484	8	47893948	-	-	INVDUP	12	464
8	48115567	8	48116771	+	+	INVDUP	13	1204
8	48214718	8	48231011	-	-	INV	24	16293
8	49509277	8	122706941	+	-	DEL	21	73197664
8	50812966	8	88866752	-	-	INV	25	38053786
8	69576571	8	81162669	-	-	INV	36	11586098
8	69576571	8	81162669	-	+	DUP	13	11586098
8	69578957	8	112054719	+	-	DEL	13	42475762
8	69578957	8	112054720	+	+	INV	26	42475763
8	69578958	8	81162670	+	-	DEL	10	11583712
8	71230467	8	72666373	-	+	DUP	81	1435906
8	71230468	8	90768257	-	+	DUP	105	19537789
8	71230468	8	72666156	-	-	INV	118	1435688
8	71386368	8	81845413	+	-	DEL	189	10459045
8	71492314	8	81846166	-	+	DUP	14	10353852
8	71811088	8	88943456	+	-	DEL	51	17132368
8	71853402	8	77419241	-	-	INV	33	5565839
8	72059217	8	122022987	+	-	DEL	19	49963770
8	72060826	8	88646974	+	-	DEL	98	16586148
8	72060826	8	86751203	+	-	DEL	13	14690377
8	72257814	8	122911216	-	-	INV	16	50653402
8	72409321	8	87083652	-	-	INV	109	14674331
8	72666153	8	86747843	-	+	DUP	11	14081690
8	72666155	8	90768257	-	+	DUP	65	18102102
8	72666372	8	90761574	+	-	DEL	10	18095202
8	72666372	8	90768257	+	+	INV	20	18101885
8	72666994	8	72711183	-	+	DUP	10	44189
8	72667067	8	76002220	+	+	INV	15	3335153
8	72667759	8	81802496	-	+	DUP	474	9134737
8	72684812	8	116294518	-	-	INV	16	43609706
8	72711183	8	76002221	+	+	INV	180	3291038
8	72711183	8	75997258	+	+	INV	104	3286075
8	72711599	8	91660990	-	-	INV	61	18949391
8	74608206	8	75040851	+	-	DEL	29	432645
8	74608206	8	75041981	+	-	DEL	23	433775
8	75032929	8	124761926	-	+	DUP	223	49728997
8	75174515	8	89205708	+	+	INV	262	14031193
8	75356125	8	92167380	+	-	DEL	23	16811255
8	75493582	8	89594886	-	+	DUP	92	14101304
8	75716444	8	76002277	+	-	DEL	146	285833
8	75997095	8	86823872	-	-	INV	10	10826777
8	76021448	8	121562752	+	+	INV	18	45541304
8	76991691	8	125474195	-	+	DUP	15	48482504
8	77575990	8	88745089	+	-	DEL	26	11169099
8	78068750	8	88744597	-	+	DUP	23	10675847
8	78255781	8	85935838	+	+	INV	15	7680057
8	78361252	8	128476857	+	-	DEL	28	50115605
8	79294835	8	116292722	+	-	DEL	14	36997887
8	79612256	8	91010895	-	+	DUP	14	11398639
8	79633233	8	131653900	+	+	INV	16	52020667
8	79978653	8	129578595	-	-	INV	15	49599942
8	80012225	8	80012981	-	-	INVDUP	37	756
8	80240284	8	116293271	-	+	DUP	14	36052987
8	80376015	8	90902707	+	-	DEL	22	10526692
8	80651378	8	125475111	+	-	DEL	15	44823733
8	81154452	8	88661849	-	+	DUP	15	7507397
8	81156997	8	115282121	-	-	INV	109	34125124
8	81165682	8	112055110	+	-	DEL	40	30889428
8	81165682	8	112055109	-	-	INV	12	30889427
8	81362629	8	109974906	-	-	INV	15	28612277
8	81380348	8	118679499	-	-	INV	16	37299151
8	81380349	8	118679498	-	-	INV	30	37299149
8	81424748	8	126617348	-	+	DUP	22	45192600
8	81753872	8	124101978	+	+	INV	23	42348106
8	81846166	8	86834568	+	+	INV	10	4988402
8	81846596	8	90768258	-	+	DUP	11	8921662
8	81846598	8	90761573	-	-	INV	301	8914975
8	81846594	8	88643749	-	-	INV	36	6797155
8	81846608	8	90762470	-	-	INV	10	8915862
8	81852181	8	88643749	+	-	DEL	324	6791568
8	81852181	8	88646856	+	+	INV	49	6794675
8	81852182	8	90761576	+	-	DEL	36	8909394
8	85777886	8	88841057	-	-	INV	15	3063171
8	85777887	8	91086692	-	-	INV	11	5308805
8	85777887	8	88841777	-	+	DUP	17	3063890
8	86139662	8	114148850	+	-	DEL	38	28009188
8	86743855	8	90772829	-	-	INV	23	4028974
8	86744639	8	90768257	-	+	DUP	19	4023618
8	86832670	8	88646974	-	-	INV	19	1814304
8	87818223	8	121429792	-	-	INV	47	33611569
8	87818223	8	121440242	-	+	DUP	16	33622019
8	87818775	8	121429791	-	-	INV	19	33611016
8	88074173	8	118202240	+	+	INV	45	30128067
8	88319284	8	89882434	+	-	DEL	58	1563150
8	88415877	8	126645903	-	+	DUP	18	38230026
8	88415877	8	122968473	-	+	DUP	12	34552596
8	88474744	8	121980852	+	+	INV	67	33506108
8	88557965	8	120497723	-	-	INV	81	31939758
8	88571740	8	89503523	+	+	INV	78	931783
8	88622821	8	120381216	-	+	DUP	22	31758395
8	88643748	8	91227354	-	+	DUP	45	2583606
8	88646855	8	91227355	+	+	INV	396	2580500
8	88662900	8	89460431	-	+	DUP	11	797531
8	88663987	8	125278608	+	-	DEL	10	36614621
8	88680425	8	118922865	-	+	DUP	37	30242440
8	88841504	8	91086691	-	-	INV	26	2245187
8	88901587	8	120151542	+	-	DEL	24	31249955
8	88903101	8	91013847	+	-	DEL	19	2110746
8	88904219	8	126479336	+	+	INV	14	37575117
8	89110987	8	89111885	-	-	INVDUP	39	898
8	89618500	8	120529246	-	+	DUP	96	30910746
8	89689847	8	112813899	-	+	DUP	22	23124052
8	89881116	8	121429791	+	-	DEL	17	31548675
8	89881120	8	121440234	+	+	INV	93	31559114
8	89905691	8	119365102	+	+	INV	42	29459411
8	90439958	8	110270684	+	+	INV	28	19830726
8	90793390	8	92134541	+	-	DEL	113	1341151
8	90944164	8	112053317	+	+	INV	13	21109153
8	90944165	8	112053317	+	-	DEL	35	21109152
8	91532560	8	114464324	-	+	DUP	20	22931764
8	91818995	8	91820018	-	-	INVDUP	15	1023
8	91937224	8	129962540	-	-	INV	20	38025316
8	92006815	8	132680877	+	+	INV	70	40674062
8	92253919	8	126644962	+	+	INV	81	34391043
8	92366603	8	92367162	+	+	INVDUP	43	559
8	92549728	8	92549953	-	-	INVDUP	23	225
8	92550279	8	109780763	+	-	DEL	112	17230484
8	104659141	8	104707479	-	+	DUP	12	48338
8	108045831	8	133456519	-	-	INV	19	25410688
8	108876122	8	133211519	+	-	DEL	18	24335397
8	108879053	8	133304841	-	-	INV	26	24425788
8	109974518	8	110181392	+	-	DEL	25	206874
8	110040678	8	112707526	+	-	DEL	86	2666848
8	112542996	8	127797901	-	-	INV	221	15254905
8	112574225	8	128227083	-	-	INV	135	15652858
8	113289604	8	113293604	-	-	INVDUP	40	4000
8	113316866	8	113317373	+	+	INVDUP	74	507
8	114033398	8	114732910	+	-	DEL	24	699512
8	114095018	8	114516645	-	+	DUP	20	421627
8	114291564	8	115057301	+	-	DEL	22	765737
8	114441777	8	121901877	+	-	DEL	45	7460100
8	114500217	8	119651163	+	-	DEL	21	5150946
8	115205936	8	118926056	+	+	INV	29	3720120
8	115804654	8	127859214	+	-	DEL	14	12054560
8	116538214	8	120598616	+	+	INV	220	4060402
8	116683596	8	120980688	-	+	DUP	346	4297092
8	116683597	8	120981357	-	-	INV	10	4297760
8	116747232	8	121079775	+	+	INV	25	4332543
8	116755830	8	121019623	-	-	INV	25	4263793
8	117028513	8	117062035	+	+	INV	11	33522
8	117028517	8	117062037	+	+	INV	439	33520
8	117049739	8	129096818	-	+	DUP	441	12047079
8	117050197	8	129096817	-	+	DUP	10	12046620
8	117224949	8	117229820	-	-	INVDUP	16	4871
8	117251664	8	128931902	+	-	DEL	14	11680238
8	117264117	8	118066354	+	-	DEL	51	802237
8	117603521	8	118145616	+	-	DEL	58	542095
8	117777222	8	121550914	+	+	INV	39	3773692
8	117962420	8	122426177	+	+	INV	12	4463757
8	118320686	8	118350534	+	-	DEL	10	29848
8	118916363	8	119593421	-	-	INV	26	677058
8	119434616	8	121478670	-	+	DUP	65	2044054
8	119591592	8	121070849	+	-	DEL	15	1479257
8	119652317	8	121043093	+	-	DEL	27	1390776
8	119978757	8	120334254	-	+	DUP	46	355497
8	120107278	8	120803638	-	-	INV	50	696360
8	120275981	8	125611861	-	-	INV	14	5335880
8	120869440	8	141795460	+	-	DEL	11	20926020
8	121326439	8	125646178	+	+	INV	201	4319739
8	121429792	8	121440241	+	+	INV	16	10449
8	121566035	8	123905824	+	-	DEL	29	2339789
8	122604570	8	128551892	+	+	INV	22	5947322
8	122618500	8	132338707	+	-	DEL	71	9720207
8	122735257	8	124420789	+	-	DEL	30	1685532
8	122968475	8	126645706	+	-	DEL	19	3677231
8	123145975	8	123249800	+	-	DEL	53	103825
8	123534798	8	123536375	+	+	INVDUP	55	1577
8	123843646	8	127862111	-	+	DUP	14	4018465
8	124083587	8	124307035	-	+	DUP	10	223448
8	124083587	8	124301710	-	-	INV	19	218123
8	125647727	8	140264210	+	-	DEL	10	14616483
8	125912675	8	128846767	+	-	DEL	10	2934092
8	128762659	8	128808125	+	-	DEL	10	45466
8	128763424	8	128808119	+	-	DEL	320	44695
8	128880626	8	128895118	+	-	DEL	41	14492
8	128930951	8	132193644	+	-	DEL	13	3262693
8	128937677	8	132211913	+	+	INV	12	3274236
8	130119774	8	141912594	-	+	DUP	19	11792820
8	133394585	8	133493354	+	+	INV	17	98769
8	133400024	8	137056651	+	-	DEL	24	3656627
8	133446171	8	137124648	-	+	DUP	12	3678477
9	6700570	9	6710690	+	-	DEL	10	10120
9	8622472	9	8633884	+	-	DEL	23	11412
9	24502071	9	24519103	+	-	DEL	17	17032
9	66454657	9	68412522	-	-	INV	32	1957865
9	86502952	9	88456799	-	+	DUP	10	1953847
9	86502953	9	88456207	+	-	DEL	10	1953254
9	141019497	9	141033684	+	-	DEL	14	14187
10	27180506	10	27644612	-	+	DUP	11	464106
10	27180895	10	27644599	+	-	DEL	11	463704
10	29796191	10	33278691	+	-	DEL	17	3482500
10	37391358	10	37402754	-	-	INV	12	11396
10	39107273	10	39154242	-	+	DUP	19	46969
10	47023083	10	47059593	-	-	INV	196	36510
10	47654518	10	51489019	+	+	INV	23	3834501
10	51137407	10	51358985	+	-	DEL	11	221578
10	56972928	10	57026208	-	+	DUP	11	53280
10	57439912	10	58862175	-	-	INV	28	1422263
10	57493846	10	57916466	+	+	INV	21	422620
10	57906473	10	58441126	-	+	DUP	17	534653
10	58078038	10	58835402	-	-	INV	17	757364
10	58244479	10	59000763	-	+	DUP	12	756284
10	58834845	10	58854882	+	+	INV	25	20037
10	60694105	10	72305080	-	+	DUP	19	11610975
10	61262009	10	73473860	+	-	DEL	25	12211851
10	61719883	10	61784563	+	-	DEL	15	64680
10	66468060	10	66469622	-	-	INVDUP	24	1562
10	66473720	10	69439053	+	-	DEL	34	2965333
10	69575580	10	71410719	+	+	INV	21	1835139
10	71184339	10	71811652	-	-	INV	27	627313
10	80474087	10	80475945	+	+	INVDUP	14	1858
10	82280946	10	82283154	+	+	INVDUP	11	2208
11	1685854	11	1708112	+	+	INV	11	22258
11	1915273	11	1961084	-	-	INV	20	45811
11	1915279	11	1936956	+	-	DEL	35	21677
11	1936972	11	1960999	+	+	INV	26	24027
11	7811175	11	7833381	+	-	DEL	13	22206
11	49734979	11	49751321	-	-	INV	17	16342
11	49736552	11	49749749	-	-	INV	23	13197
11	51341172	11	51362941	+	-	DEL	26	21769
11	55364519	11	55434494	+	+	INV	18	69975
11	55431551	11	55445868	-	+	DUP	10	14317
11	55444020	11	55458153	-	-	INV	11	14133
12	8558486	12	8590847	+	-	DEL	18	32361
12	17923021	12	18013013	-	-	INV	15	89992
12	33296537	12	33307366	+	-	DEL	34	10829
12	80844509	12	80859460	+	+	INV	17	14951
12	80846527	12	80857485	-	-	INV	22	10958
12	87239334	12	87253829	-	-	INV	38	14495
12	98396516	12	98413591	-	+	DUP	12	17075
12	98951747	12	99874972	+	-	DEL	14	923225
12	99578452	12	99596383	+	-	DEL	12	17931
12	108039300	12	109351383	+	-	DEL	18	1312083
12	116120543	12	116137956	+	+	INV	15	17413
12	126997177	12	127019804	+	-	DEL	28	22627
13	66618360	13	66691303	+	-	DEL	17	72943
13	114325993	13	114425993	+	-	DEL	32	100000
8	121566036	8	123905824	+	-	DEL	15	2339788
14	24442529	14	24485076	+	-	DEL	12	42547
14	24443483	14	24485879	-	+	DUP	14	42396
14	35010381	14	35031122	+	+	INV	14	20741
14	35014812	14	35026761	+	+	INV	13	11949
14	38140860	14	38737960	-	+	DUP	17	597100
14	50159176	14	57977664	-	-	INV	43	7818488
14	53105887	14	92485816	+	+	INV	49	39379929
14	57046263	14	84871570	+	-	DEL	11	27825307
14	68958876	14	68975146	-	-	INV	10	16270
14	99897165	14	99989500	+	-	DEL	10	92335
14	106717430	14	106728255	-	+	DUP	12	10825
15	20443893	15	21242628	-	-	INV	14	798735
15	20627877	15	22596194	+	+	INV	20	1968317
15	20634166	15	22589899	+	+	INV	25	1955733
15	20935076	15	21941705	-	+	DUP	10	1006629
15	21201272	15	22292964	+	-	DEL	11	1091692
15	25420176	15	25430886	+	-	DEL	14	10710
15	47698807	15	47787287	+	-	DEL	13	88480
16	21594442	16	22710752	+	+	INV	20	1116310
16	34392108	16	34757736	+	+	INV	25	365628
16	34396214	16	34464446	-	-	INV	14	68232
16	46385802	16	46416992	-	-	INV	32	31190
16	46385801	16	46426313	-	-	INV	59	40512
16	46386855	16	46398491	-	+	DUP	12	11636
16	46387203	16	46424905	-	-	INV	22	37702
16	46388103	16	46405864	+	-	DEL	11	17761
16	46389207	16	46406859	-	+	DUP	11	17652
16	46390281	16	46408197	-	+	DUP	11	17916
16	46390346	16	46402237	-	+	DUP	10	11891
16	46389880	16	46422027	-	-	INV	15	32147
16	46391274	16	46409272	-	+	DUP	19	17998
16	46392301	16	46404221	-	+	DUP	13	11920
16	46392712	16	46424967	+	+	INV	10	32255
16	46392432	16	46404268	+	-	DEL	17	11836
16	46393046	16	46404620	-	+	DUP	11	11574
16	46393226	16	46405299	+	-	DEL	10	12073
16	46394931	16	46427149	+	+	INV	15	32218
16	46394528	16	46406414	+	-	DEL	10	11886
16	46395575	16	46407738	+	-	DEL	14	12163
16	46399047	16	46424635	-	-	INV	16	25588
16	46407751	16	46421744	+	+	INV	12	13993
16	46410600	16	46430831	+	+	INV	10	20231
16	68632570	16	68856091	+	-	DEL	13	223521
16	75238565	16	75258192	+	+	INV	16	19627
16	75240112	16	75256648	+	+	INV	27	16536
17	26654055	17	75068122	-	+	DUP	32	48414067
17	28968949	17	30874057	+	-	DEL	16	1905108
17	29210863	17	60648254	+	-	DEL	42	31437391
17	30874406	17	68915105	+	-	DEL	21	38040699
17	36350388	17	36406169	+	+	INV	14	55781
17	39272119	17	39272582	-	-	INVDUP	47	463
17	39422080	17	39432385	+	-	DEL	202	10305
17	43655789	17	44366713	-	+	DUP	14	710924
17	43662003	17	62915039	+	-	DEL	16	19253036
17	43663154	17	62916207	+	-	DEL	18	19253053
17	44212776	17	44369548	-	+	DUP	10	156772
17	44369548	17	62918511	+	+	INV	10	18548963
17	48765509	17	49524569	-	+	DUP	17	759060
17	66593522	17	66758216	+	-	DEL	68	164694
18	6006200	18	6023412	-	+	DUP	27	17212
18	33240515	18	45546679	+	+	INV	11	12306164
18	44841469	18	54458622	-	-	INV	13	9617153
19	4592588	19	4604629	+	-	DEL	10	12041
19	39264375	19	39279625	-	-	INV	11	15250
19	54723747	19	54743500	+	-	DEL	11	19753
20	213149	20	44482797	+	-	DEL	10	44269648
20	414670	20	25332631	-	+	DUP	10	24917961
20	1560529	20	1593582	+	-	DEL	21	33053
20	1561704	20	1594772	+	-	DEL	19	33068
20	3053859	20	51817987	+	+	INV	11	48764128
20	9544681	20	48330177	-	+	DUP	10	38785496
20	9572205	20	52277680	+	+	INV	10	42705475
20	12130561	20	22590502	-	-	INV	16	10459941
20	12535391	20	12964752	+	-	DEL	11	429361
20	14423304	20	14611706	+	-	DEL	19	188402
20	14798588	20	15256347	+	-	DEL	13	457759
20	16227795	20	55906660	+	-	DEL	13	39678865
20	16860872	20	48442405	-	+	DUP	10	31581533
20	16877986	20	52798345	+	-	DEL	19	35920359
20	17314225	20	41325667	+	-	DEL	10	24011442
20	19330599	20	35761961	+	-	DEL	12	16431362
20	23778721	20	48437189	-	-	INV	11	24658468
20	25456491	20	48878146	-	+	DUP	12	23421655
20	25463536	20	33823430	+	-	DEL	14	8359894
20	25536701	20	36140884	+	+	INV	18	10604183
20	32954464	20	37597982	-	+	DUP	65	4643518
20	33093531	20	36492647	-	+	DUP	12	3399116
20	33097186	20	48383039	+	-	DEL	15	15285853
20	33200659	20	48393418	-	+	DUP	14	15192759
20	33212420	20	41941735	+	+	INV	11	8729315
20	33505609	20	33818755	-	+	DUP	11	313146
20	33692261	20	53717050	-	+	DUP	12	20024789
20	34115129	20	57537728	+	+	INV	51	23422599
20	34216568	20	34460433	+	-	DEL	20	243865
20	34461041	20	51186522	+	-	DEL	21	16725481
20	34462210	20	47362266	+	-	DEL	22	12900056
20	34474062	20	41280707	-	-	INV	33	6806645
20	34474130	20	41290629	-	-	INV	19	6816499
20	35763698	20	53299344	+	-	DEL	12	17535646
20	35982192	20	45039422	-	+	DUP	11	9057230
20	36475728	20	36565627	-	+	DUP	16	89899
20	42204144	20	46799767	+	+	INV	11	4595623
20	42553421	20	47744170	+	-	DEL	37	5190749
20	44601310	20	53331105	-	-	INV	32	8729795
20	47506339	20	53267366	+	+	INV	15	5761027
20	47689224	20	47948691	+	-	DEL	25	259467
20	48328010	20	48662128	-	+	DUP	12	334118
20	48659756	20	56618015	-	+	DUP	13	7958259
20	51105853	20	53331733	-	+	DUP	37	2225880
20	55923518	20	57357521	+	-	DEL	11	1434003
22	39358682	22	39388617	+	-	DEL	18	29935
22	46894505	22	47576370	+	-	DEL	23	681865
22	50087316	22	50211792	-	+	DUP	14	124476
X	7177021	X	7406673	+	-	DEL	16	229652
X	7623883	X	7673882	+	-	DEL	47	49999
X	10738674	X	10788675	+	-	DEL	36	50001
X	46810694	X	46830781	-	-	INV	88	20087
X	72225395	X	72297320	-	-	INV	10	71925
X	74895313	X	78084044	+	+	INV	27	3188731
X	78696442	X	100190055	-	-	INV	11	21493613
X	90679751	X	103221816	+	-	DEL	11	12542065
X	90694449	X	103981977	-	+	DUP	51	13287528
X	103226380	X	103768965	+	-	DEL	25	542585
X	115137998	X	115152944	+	-	DEL	20	14946
X	148509912	X	148537646	+	-	DEL	19	27734
X	148736071	X	148830519	+	+	INV	10	94448
X	149570434	X	149586204	-	-	INV	11	15770
X	149570644	X	149585992	+	+	INV	10	15348
X	154790190	X	154803271	+	-	DEL	24	13081
X	155032960	X	155216351	-	+	DUP	19	183391
X	155033481	X	155214084	+	-	DEL	18	180603
MT	0	MT	16570	-	+	DUP	632	16570
MT	775	MT	16557	-	+	DUP	12	15782
1	144526547	1	149203683	-	-	INV	14	4677136
7	100554621	7	100606044	+	-	DEL	15	51423
7	100556044	7	100607264	+	-	DEL	13	51220
1	564466	MT	3916	-	+	TRA	11	-1
1	566067	MT	5516	-	+	TRA	29	-1
1	567802	MT	7251	+	-	TRA	25	-1
1	569498	MT	8945	+	-	TRA	14	-1
1	9121446	14	93713178	+	+	TRA	13	-1
1	59096804	2	32048479	+	-	TRA	13	-1
1	88972810	17	32063854	-	-	TRA	20	-1
1	142539843	21	10084921	+	-	TRA	27	-1
1	145137031	12	93795147	+	+	TRA	16	-1
1	145958228	9	140785678	+	+	TRA	13	-1
1	147499947	9	140785679	+	+	TRA	17	-1
1	148953136	2	91823183	+	+	TRA	20	-1
1	148954461	2	91821872	+	+	TRA	31	-1
1	168420928	8	30105891	-	+	TRA	24	-1
1	168420940	8	30104064	+	-	TRA	17	-1
1	229354404	5	137884949	+	-	TRA	20	-1
2	42051404	4	66413937	-	+	TRA	40	-1
2	42052611	4	66413930	+	-	TRA	54	-1
2	132134998	6	120517010	+	-	TRA	11	-1
3	13551535	8	88652874	-	-	TRA	22	-1
3	111275066	8	128533851	+	+	TRA	154	-1
3	141362873	8	89804899	-	+	TRA	34	-1
3	155027218	13	25670718	-	-	TRA	26	-1
3	172729127	8	123452820	+	-	TRA	45	-1
3	187728895	6	93097209	+	+	TRA	15	-1
4	120799561	8	43698997	+	+	TRA	25	-1
4	170280994	14	52667768	-	+	TRA	53	-1
5	43086353	7	80543735	-	-	TRA	11	-1
5	147796408	8	132779626	+	+	TRA	21	-1
5	147797274	8	137097038	-	+	TRA	21	-1
5	147831566	8	133497676	+	-	TRA	23	-1
5	147831842	8	108045141	-	+	TRA	36	-1
5	147963803	8	137116850	+	+	TRA	13	-1
5	148005640	8	92562293	-	+	TRA	34	-1
5	148006755	8	137142059	-	-	TRA	27	-1
5	148118353	8	137103196	-	-	TRA	26	-1
5	148135460	8	133436093	-	-	TRA	16	-1
5	154292930	8	98642134	+	-	TRA	23	-1
5	154452833	8	104658426	+	+	TRA	25	-1
5	154748362	8	133440582	+	+	TRA	17	-1
5	157705034	8	109779851	-	+	TRA	25	-1
5	157708811	8	104706712	-	+	TRA	18	-1
5	157758035	8	104704138	+	+	TRA	24	-1
5	157890484	8	137102953	-	+	TRA	32	-1
5	158292719	8	108890125	+	+	TRA	21	-1
5	158323256	8	104706231	-	-	TRA	22	-1
5	158440321	8	133456417	+	+	TRA	26	-1
5	158451317	8	137330993	+	+	TRA	21	-1
5	159349717	X	66982772	-	+	TRA	20	-1
5	159351200	X	66982754	+	-	TRA	17	-1
6	382459	16	33428531	+	+	TRA	29	-1
6	24684004	22	32927890	+	-	TRA	12	-1
6	116774304	7	26251701	-	-	TRA	19	-1
6	116774819	15	40854180	+	-	TRA	20	-1
7	1916576	22	23774214	+	+	TRA	26	-1
7	1916573	22	23771710	-	-	TRA	27	-1
7	6206531	10	58374883	-	+	TRA	24	-1
7	26251702	15	40854180	-	-	TRA	11	-1
7	26252972	15	40854195	+	+	TRA	39	-1
7	61846559	16	32515392	+	+	TRA	22	-1
7	81789148	10	60902409	-	-	TRA	50	-1
7	114667925	MT	8500	+	+	TRA	46	-1
7	114670635	MT	3218	-	-	TRA	80	-1
7	132848765	10	66518375	-	+	TRA	22	-1
8	52730143	11	38812670	-	+	TRA	40	-1
8	52731480	11	38812657	+	-	TRA	44	-1
8	77264212	19	14771336	-	-	TRA	14	-1
8	77706277	14	57041014	-	-	TRA	15	-1
8	78454701	17	78166081	+	+	TRA	63	-1
8	79165476	14	52222851	+	-	TRA	45	-1
8	79475426	17	38474391	-	+	TRA	107	-1
8	80012981	X	93874349	-	-	TRA	19	-1
8	80084495	17	39542194	+	+	TRA	16	-1
8	80086763	17	39542193	+	+	TRA	64	-1
8	83499057	14	57066926	-	-	TRA	46	-1
8	87386932	X	102225914	-	-	TRA	31	-1
8	87627082	X	104471467	+	+	TRA	22	-1
8	90190191	X	104469741	-	-	TRA	23	-1
8	91704095	14	64434787	-	-	TRA	22	-1
8	91944009	14	58569878	-	-	TRA	19	-1
8	92418022	14	51282873	-	+	TRA	26	-1
8	92439343	17	65757912	+	+	TRA	29	-1
8	112373018	X	78701718	-	+	TRA	21	-1
8	112376649	X	76792724	+	-	TRA	21	-1
8	112924520	14	64163564	+	+	TRA	19	-1
8	115501743	14	84882550	-	+	TRA	18	-1
8	115851296	14	45993847	-	+	TRA	22	-1
8	115856577	14	57046328	+	-	TRA	27	-1
8	115856622	14	85492900	-	-	TRA	56	-1
8	117989050	17	40572172	-	+	TRA	60	-1
8	119611754	13	95081131	+	-	TRA	24	-1
8	121542260	17	76745814	-	-	TRA	65	-1
8	121550938	17	37277012	-	-	TRA	333	-1
8	121677137	14	58502840	-	+	TRA	39	-1
8	123492233	15	88059647	+	-	TRA	11	-1
8	123534798	21	21812695	+	+	TRA	58	-1
8	123536376	21	21812520	+	-	TRA	56	-1
8	123907489	17	64043765	+	+	TRA	34	-1
8	124084323	17	74797339	+	-	TRA	11	-1
8	124819450	17	65286182	-	-	TRA	20	-1
8	125549099	17	38067674	-	+	TRA	204	-1
8	126480843	17	64043765	-	+	TRA	15	-1
8	128353289	17	66250050	-	+	TRA	31	-1
8	130560518	19	20019994	+	-	TRA	12	-1
8	131390649	14	57066836	+	+	TRA	13	-1
8	146301391	19	20358150	+	+	TRA	16	-1
9	35884434	11	81872547	+	-	TRA	18	-1
9	90373007	20	4082831	-	-	TRA	13	-1
9	90375037	20	4082847	+	+	TRA	13	-1
9	97911309	11	92876364	-	+	TRA	15	-1
10	80478198	16	61536323	-	+	TRA	18	-1
11	49883572	MT	16570	+	+	TRA	14	-1
12	169852	20	62965513	+	+	TRA	24	-1
12	56990097	15	39994625	+	-	TRA	22	-1
13	44069839	15	41871537	+	+	TRA	17	-1
14	50256582	17	64042266	+	-	TRA	40	-1
14	57212496	17	74808616	+	-	TRA	30	-1
14	68974333	15	47698394	+	-	TRA	11	-1
20	23968764	22	21483967	+	+	TRA	16	-1
1	9121450	14	93712486	-	-	TRA	11	-1
3	111274086	8	128533830	-	-	TRA	288	-1
3	187728890	6	93096669	-	-	TRA	16	-1
6	24683988	22	32928561	-	+	TRA	27	-1
7	81789168	10	60902927	+	+	TRA	32	-1
8	80012226	X	93874557	-	+	TRA	20	-1
