# Supplementary material for: Complex rearrangements and oncogene amplifications revealed by long-read DNA and RNA sequencing of a breast cancer cell line
Source: HighWire-hosted journal article supplement (doi:10.1101/gr.231100.117), 2018-06-28
Supplement: Supplemental_Table7_PCR_Primers_for_Validation.xlsx [file Supplemental_Table7_PCR_Primers_for_Validation.xlsx]

## Sheet: Validations
Supplementary Table 8. Details on PCR primers for validation.
Validation rates computed as (number of valid Sanger sequencing products) / (number of valid PCR attempts)
chrom1	start1	stop1	chrom2	start2	stop2	variant ID	strand1	strand2	variant type	number_reads	primer1 position	primer1 position	variant call-set	primer1	primer2	PCR notes	Sanger seq notes	Comments	Count as valid attempt	PCR passed	Sanger passed	PCR passed AND valid attempt	Sanger passed AND valid attempt	Valid attempt OR Sanger passed anyway
15	20634166	20634167	15	22589899	22589900	SN001	+	+	INV	25	left of 15:20634066 pointing right	left of 15:22589799 pointing right	Sniffles	TTGGACACGCTGATTGATCATTTTA	AAATTCCTCGGGACACAGAGAAAAA		worked	primer conflict	0	1	1	0	0	1
8	86744639	86744640	8	90768257	90768258	SN002	-	+	DUP	19	right of 8:86744740 pointing left	left of 8:90768157 pointing right	Sniffles	ACATTTCTGGCAGCCCTACTTCTTC	tggtgggccctttaaatatgaagac		worked		1	1	1	1	1	1
8	91532560	91532561	8	114464324	114464325	SN003	-	+	DUP	20	right of 8:91532661 pointing left	left of 8:114464224 pointing right	Sniffles	CCACCCTAATCCTCCAAATCTGAAA	TTGATCTGGTTCCTCACTTTTCCAA		worked		1	1	1	1	1	1
20	23968764	23968765	22	21483967	21483968	SN004	+	+	TRA	16	left of 20:23968664 pointing right	left of 22:21483867 pointing right	Sniffles	gaggtattgacattgagtggctgct	TGCTTAGGAAAGACCCACACTTGAG		messy seq, only 1 side		1	1	1	1	1	1
6	32452982	32452983	6	32539039	32539040	SN005	+	-	DEL	12	left of 6:32452882 pointing right	right of 6:32539140 pointing left	Sniffles	GCAGAATAACTTGCAGAGACATCACC	CCTAATATGATGAGGCTCCTGACT	no product	failed		1	0	0	0	0	1
X	154790190	154790191	X	154803271	154803272	SN006	+	-	DEL	24	left of X:154790090 pointing right	right of X:154803372 pointing left	Sniffles	tgtcgggtgtctactttgtgctaga	ATGCCACTGGATATGAGTTTCGTGT		worked		1	1	1	1	1	1
14	35010381	35010382	14	35031122	35031123	SN007	+	+	INV	14	left of 14:35010281 pointing right	left of 14:35031022 pointing right	Sniffles	TACCTGAGGAGAACAGGCAGATGAC	ACGGAAACTCAACAGTTCAAACAGC		worked	primer conflict	0	1	1	0	0	1
8	80084495	80084496	17	39542194	39542195	SN008	+	+	TRA	16	left of 8:80084395 pointing right	left of 17:39542094 pointing right	Sniffles	GCTCACGTTGTGTAGGGAGTTGttt	ttgcttctcccacacacatctttta		worked		1	1	1	1	1	1
6	32450721	32450722	6	32538479	32538480	SN009	+	-	DEL	15	left of 6:32450621 pointing right	right of 6:32538580 pointing left	Sniffles	tctctcacattctcacttcacccact	taaaatgtcagcaccagcaCTGAAG	primer	failed	primer conflict	0	0	0	0	0	0
7	54376580	54376581	7	54388718	54388719	SN010	+	-	DEL	15	left of 7:54376480 pointing right	right of 7:54388819 pointing left	Sniffles	tcacaaaatgagtgagggaggattc	AGCTGGACAGGGAATGACTTTGAC	multi-banded	failed	primers match all over	0	0	0	0	0	0
8	71230468	71230469	8	90768257	90768258	SN011	-	+	DUP	105	right of 8:71230569 pointing left	left of 8:90768157 pointing right	Sniffles	agatgggattttgcctagttgccta	ttttcttgggctactcccatgtttt	light band w/ primer	messy seq, only 1 side		1	1	0	1	0	1
8	116683597	116683598	8	120981357	120981358	SN012	-	-	INV	10	right of 8:116683698 pointing left	right of 8:120981458 pointing left	Sniffles	TAATTCAGTTTGTGCCATGCAAATG	gactgacatggtgaaaccctctgtc		worked		1	1	1	1	1	1
X	78696442	78696443	X	100190055	100190056	SN013	-	-	INV	11	right of X:78696543 pointing left	right of X:100190156 pointing left	Sniffles	AATGCTACTTCCTGCCATCCCTAAG	gagaactggaagaggctggaagaac	very light band	failed		1	1	0	1	0	1
5	157895854	157895855	5	158230079	158230080	SN014	+	-	DEL	14	left of 5:157895754 pointing right	right of 5:158230180 pointing left	Sniffles	TTTTCACTCCTTCAGCCACAGTCTC	GTGAGCAGGAAGGTCATCATTCACT	no product	failed		1	0	0	0	0	1
16	46388103	46388104	16	46405864	46405865	SN015	+	-	DEL	11	left of 16:46388003 pointing right	right of 16:46405965 pointing left	Sniffles	CGGTAGGGTCCGTTCGATGTTG	TCACCAAATCGACATGGATGGA	multiband w/ primer	failed	multi match primers but 1 product	1	0	0	0	0	1
10	27180506	27180507	10	27644612	27644613	SN016	-	+	DUP	11	right of 10:27180607 pointing left	left of 10:27644512 pointing right	Sniffles	GCAACACTCTCTGACCTCTCCTTTG	GCAACACTCTCTGACCTCTCCTTTG	no product	failed	possible primer conflict	0	0	0	0	0	0
11	7811175	7811176	11	7833381	7833382	SN017	+	-	DEL	13	left of 11:7811075 pointing right	right of 11:7833482 pointing left	Sniffles	tgtctgttcatatcctttgcccact	aactgaacaacctgctcctgaatga	light smear	failed	primers match all over	0	0	0	0	0	0
5	43086353	43086354	7	80543735	80543736	SN018	-	-	TRA	11	right of 5:43086454 pointing left	right of 7:80543836 pointing left	Sniffles	ACACTGTCCTAGATGGCTGAAATGC	GACTACCCACACTTTTCCTCCCAAG		failed		1	1	0	1	0	1
17	43663154	43663155	17	62916207	62916208	SN019	+	-	DEL	18	left of 17:43663054 pointing right	right of 17:62916308 pointing left	Sniffles	GGCAGCGACCGAGGGAAATTAGTC	CGCTTCTGTTGAGAAACACTGATGA		worked but messy	primer conflict	0	1	1	0	0	1
3	162525742	162525743	3	162545362	162545363	SN020	+	-	DEL	22	left of 3:162525642 pointing right	right of 3:162545463 pointing left	Sniffles	tgGCTCACCATATCTCGTACATTGA	gttgtttagtttggcattcctgtgg	no product	failed		1	0	0	0	0	1
8	69576571	69576572	8	81162669	81162670	SN021	-	+	DUP	13	right of 8:69576672 pointing left	left of 8:81162569 pointing right	Sniffles	GTTCAATGGGGTGacatcctgataa	GATGGTCATTCAATAGGTGGCAGTC	no product	failed		1	0	0	0	0	1
3	187131533	187131534	3	187146604	187146605	SN022	+	+	INV	17	left of 3:187131433 pointing right	left of 3:187146504 pointing right	Sniffles	CAGGGTGACTCATATCTGCCATTG	TGTGTCTCTACCCGGCTTTGGTAT	multiband w/ primer	failed	primer 2 multimatch	0	0	0	0	0	0
8	124083587	124083588	8	124307035	124307036	SN023	-	+	DUP	10	right of 8:124083688 pointing left	left of 8:124306935 pointing right	Sniffles	gccatacatcggaaatcaaagtgtc	TGCTCTTCACAGGTACTATTGCAT	no product	failed		1	0	0	0	0	1
7	76450649	76450650	7	76463778	76463779	SN024	-	+	DUP	22	right of 7:76450750 pointing left	left of 7:76463678 pointing right	Sniffles	TCTCCCGCATTCCTTTGAAATCTAT	TGGTGGACACTTTTGTGCAACTAGA		worked		1	1	1	1	1	1
2	110109338	110109339	2	110251338	110251339	SN025	+	-	DEL	32	left of 2:110109238 pointing right	right of 2:110251439 pointing left	Sniffles	TACACCTGCTGTTAGCATCACAAGA	TGACCCCTGATTAGATGGAACACTC	multi banded	failed		1	0	0	0	0	1
12	87239334	87239335	12	87253829	87253830	SN026	-	-	INV	38	right of 12:87239435 pointing left	right of 12:87253930 pointing left	Sniffles	agtttgaaatcaggtagcgtgatgc	CCACACTTTTCACCTCTTCCTCCTT	multi banded	messy		0	0	0	0	0	0
8	74608206	74608207	8	75041981	75041982	SN027	+	-	DEL	23	left of 8:74608106 pointing right	right of 8:75042082 pointing left	Sniffles	agactgtgcttcctaggcaactcct	cataagttgcccagaagaccagaga	light band w/primer	failed		1	1	0	1	0	1
1	110227751	110227752	1	110246214	110246215	SN028	+	-	DEL	10	left of 1:110227651 pointing right	right of 1:110246315 pointing left	Sniffles	gtctataaacagccgctttgggaat	gtgattattgggaaatcctgtgcaa		failed		0	1	0	0	0	0
1	145080163	145080164	1	145189463	145189464	SN029	+	-	DEL	14	left of 1:145080063 pointing right	right of 1:145189564 pointing left	Sniffles	CCTACACTCAGCATGCACAAAGAAA	aaggatgaccccacatttctgattt		worked, seq qual mediocre		1	1	1	1	1	1
7	62825540	62825541	7	62843124	62843125	SN030	+	+	INV	12	left of 7:62825440 pointing right	left of 7:62843024 pointing right	Sniffles	gatacccctcttggtaatggtgtcc	gagttcaagacaaggctggaaaaca		worked	primer conflict	0	1	1	0	0	1
8	113289604	113289605	8	113293604	113293605	SN031	-	-	INVDUP	40	right of 8:113289705 pointing left	right of 8:113293705 pointing left	Sniffles	GGCTGAAGATGTCCCAAGAAGGTAT	TCTCTGTTGCATCTCATCACTCATTG		worked		1	1	1	1	1	1
8	69578958	69578959	8	81162670	81162671	SN032	+	-	DEL	10	left of 8:69578858 pointing right	right of 8:81162771 pointing left	Sniffles	GGCAAGTGTATGAGGCACATTAGGa	ATTTGAGCACACCTGGAACCTGATA	no product	failed		1	0	0	0	0	1
10	66468060	66468061	10	66469622	66469623	SN033	-	-	INVDUP	24	right of 10:66468161 pointing left	right of 10:66469723 pointing left	Sniffles	TTAGCTTCACCCAAACACAGATGCT	atgtagggcCTTGTGGAAAGTCAAT		worked		1	1	1	1	1	1
1	148953136	148953137	2	91823183	91823184	SN034	+	+	TRA	20	left of 1:148953036 pointing right	left of 2:91823083 pointing right	Sniffles	aaggtgggtgaaggtcatgaaagtt	GATGATTGTGATGAGGAGGTTACCG		worked	primer conflict	0	1	1	0	0	1
12	8558486	8558487	12	8590847	8590848	SN035	+	-	DEL	18	left of 12:8558386 pointing right	right of 12:8590948 pointing left	Sniffles	GGAGCAAGTGAAGAAATCAGCAGAG	TGCAGCACGGTGTCAGAGTAAAGTA		worked	primer conflict	0	1	1	0	0	1
4	8799204	8799205	4	8818203	8818204	SN036	+	-	DEL	16	left of 4:8799104 pointing right	right of 4:8818304 pointing left	Sniffles	AGCCAATATCATGGCAGTGAGGTTA	AGATTCCCCCtccactcatcatc		worked, 2 seqs		1	1	1	1	1	1
11	49736552	49736553	11	49749749	49749750	SN037	-	-	INV	23	right of 11:49736653 pointing left	right of 11:49749850 pointing left	Sniffles	tcatagcagaaaatttggcagtggt	AAAGGCAGTGGTAGCTTGATGGGG	multiband w/ primer	failed		1	0	0	0	0	1
12	80846527	80846528	12	80857485	80857486	SN038	-	-	INV	22	right of 12:80846628 pointing left	right of 12:80857586 pointing left	Sniffles	tacctgaaagtgatggggagaatga	tttgctgaggagagctttacttcca		worked	primers match all over	0	1	1	0	0	1
16	46393046	46393047	16	46404620	46404621	SN039	-	+	DUP	11	right of 16:46393147 pointing left	left of 16:46404520 pointing right	Sniffles	GACACGAATGGAAACCTGTGGAAC	TCGACGGTGAGCAATTCGATTCAA	smear	failed	multimatch	0	0	0	0	0	0
3	191703494	191703495	3	192536779	192536780	SN040	-	+	DUP	20	right of 3:191703595 pointing left	left of 3:192536679 pointing right	Sniffles	GGGGAGAAGGCATGAAGCATATTAC	GCTTTTGCCTCCTAACCTTACTCCA	no product	failed		1	0	0	0	0	1
8	72666155	72666156	8	90768257	90768258	SN041	-	+	DUP	65	right of 8:72666256 pointing left	left of 8:90768157 pointing right	Sniffles	TTTCAAGTCAACCCCAATAGCAGAA	ctgccatatttctctcatcctggag	no product	failed		1	0	0	0	0	1
7	61846559	61846560	16	32515392	32515393	SN042	+	+	TRA	22	left of 7:61846459 pointing right	left of 16:32515292 pointing right	Sniffles	tgaatggatatttgggagctcattg	GCATTGGGGCCAAACTAGAAGTTTCC	band w/ primer	worked	primers match all over	0	1	1	0	0	1
11	1685854	1685855	11	1708112	1708113	SN043	+	+	INV	11	left of 11:1685754 pointing right	left of 11:1708012 pointing right	Sniffles	cagattcaagaggaagatggcagaa	AAACTCCTCAGCAGCTCCCACTACT		worked	primer conflict	0	1	1	0	0	1
8	81846596	81846597	8	90768258	90768259	SN044	-	+	DUP	11	right of 8:81846697 pointing left	left of 8:90768158 pointing right	Sniffles	TGTGGGTCCAGCAGAGAGAATAGAG	ctgccatatttctctcatcctggag	no product	failed		1	0	0	0	0	1
1	144710527	144710528	1	144985942	144985943	SN045	+	-	DEL	10	left of 1:144710427 pointing right	right of 1:144986043 pointing left	Sniffles	atggcgaaaccccatctctactaaa	TGTCTCAAATGTTTCCCTTGTTTGC	smear	failed, messy seq	primer conflict	0	0	0	0	0	0
6	26762089	26762090	6	26762266	26762267	SN046	+	+	INVDUP	16	left of 6:26761989 pointing right	left of 6:26762166 pointing right	Sniffles	tgtatgcatcgtgcttttgtgtgt	gtatgcatcgtgcttttgtgtgtaaa	no product	failed		1	0	0	0	0	1
10	27180895	27180896	10	27644599	27644600	SN047	+	-	DEL	11	left of 10:27180795 pointing right	right of 10:27644700 pointing left	Sniffles	TTGCTGCTAACCTCCATGAAGAAAC	agatcctccagtgaacatggaagtg	no product	failed		0	0	0	0	0	0
8	85777887	85777888	8	91086692	91086693	SN048	-	-	INV	11	right of 8:85777988 pointing left	right of 8:91086793 pointing left	Sniffles	GGATAATGGATGGATGGGAATGTTT	CTCTTTTCATCTGCAGTGGGATTTG	light band	failed		1	1	0	1	0	1
9	35884434	35884435	11	81872547	81872548	SN049	+	-	TRA	18	left of 9:35884334 pointing right	right of 11:81872648 pointing left	Sniffles	CAATGAAAACCACATCCACAGACAG	cgtgggacttaattcacattttcc	no product	failed		1	0	0	0	0	1
1	144526546	144526547	1	149203683	149203684	SN050	-	-	INV	28	right of 1:144526647 pointing left	right of 1:149203784 pointing left	Sniffles	ATTTAGTGGCCCTGCCTTCTTACAC	ATCTTTATGAACCCCCTTTCCTGCT		worked	primer conflict	0	1	1	0	0	1
8	92549728	92549729	8	92549953	92549954	SN051	-	-	INVDUP	23	right of 8:92549829 pointing left	right of 8:92550054 pointing left	Sniffles	catttgggttggttccatgtatttg	acatgacataggtctgggcaatgat	light band w/ primer	messy seq	primers match all over	0	1	0	0	0	0
5	159351200	159351201	X	66982754	66982755	SN052	+	-	TRA	17	left of 5:159351100 pointing right	right of X:66982855 pointing left	Sniffles	CACAGCAAACAAGATACCTCCCAAG	atTGATTTGGCTTCCCTTTCTTCC		worked, seq only 1 side		1	1	1	1	1	1
9	86502953	86502954	9	88456207	88456208	SN053	+	-	DEL	10	left of 9:86502853 pointing right	right of 9:88456308 pointing left	Sniffles	tgtttgttactgtcctgcaccagaa	CATGGCTGCTTGAGTAGCATTTACC	no product	failed		0	0	0	0	0	0
16	75240112	75240113	16	75256648	75256649	SN054	+	+	INV	27	left of 16:75240012 pointing right	left of 16:75256548 pointing right	Sniffles	TGATGTCATTGTTCACGGTCAGAAT	tgacagagcaagaccctaactggaa		worked	primer conflict	0	1	1	0	0	1
1	2634221	2634222	1	2687903	2687904	SN055	+	-	DEL	23	left of 1:2634121 pointing right	right of 1:2688004 pointing left	Sniffles	ACCCTCTACCCACACGTGAGCATCT	GAGGTGAGGATGACATTCCATGTG	smear	failed		0	0	0	0	0	0
8	91818995	91818996	8	91820018	91820019	SN056	-	-	INVDUP	15	right of 8:91819096 pointing left	right of 8:91820119 pointing left	Sniffles	CCGAACCTTTGTTCCAGCTTCTACT	TGTTTGTTTCTGTGGCAGCTGATAA		worked		1	1	1	1	1	1
2	21153113	21153114	2	21178114	21178115	SN057	+	-	DEL	25	left of 2:21153013 pointing right	right of 2:21178215 pointing left	Sniffles	CAGAATGCAAACTCATGATCTGGTG	ATGTGTCTCTGGGCAGGTTTATGG		worked, 2 seqs		1	1	1	1	1	1
1	152759686	152759687	1	152770193	152770194	SN058	+	-	DEL	17	left of 1:152759586 pointing right	right of 1:152770294 pointing left	Sniffles	ATGGAACCGACACTTTTATGGGTCT	TCAGTTCAGGCAGCACAGAATACAG		worked	primer conflict	0	1	1	0	0	1
19	4592588	4592589	19	4604629	4604630	SN059	+	-	DEL	10	left of 19:4592488 pointing right	right of 19:4604730 pointing left	Sniffles	CTTTAATGACAAATGAGGCCAGCAG	cacacaGTCTGAACGTGGTGAAAAC	double band	failed		1	1	0	1	0	1
1	145137031	145137032	12	93795147	93795148	SN060	+	+	TRA	16	left of 1:145136931 pointing right	left of 12:93795047 pointing right	Sniffles	CACAAATGACAGTCCCAACACTCTG	ACTAAAATGAGGGATGGGGGAAAGT		worked	primer conflict	0	1	1	0	0	1
14	24443483	24443484	14	24485879	24485880	SN061	-	+	DUP	14	right of 14:24443584 pointing left	left of 14:24485779 pointing right	Sniffles	tttgttttgttgtgtctctgccaag	agaggtccctgtagctttccacagt		worked	primer conflict	0	1	1	0	0	1
10	37391358	37391359	10	37402754	37402755	SN062	-	-	INV	12	right of 10:37391459 pointing left	right of 10:37402855 pointing left	Sniffles	gcattgtcaaaaatttaacccagca	ACAGGTGCTTCCGATTCATCATCTA		worked	primer conflict	0	1	1	0	0	1
8	72666372	72666373	8	90768257	90768258	SN063	+	+	INV	20	left of 8:72666272 pointing right	left of 8:90768157 pointing right	Sniffles	TGTGCCCTAAGTGGAATGGTAGAGA	ttgctctccaattctgccatatttc	no product	failed		1	0	0	0	0	1
16	46390346	46390347	16	46402237	46402238	SN064	-	+	DUP	10	right of 16:46390447 pointing left	left of 16:46402137 pointing right	Sniffles	ATTGCTCACCGACGCATGGAATCA	TTGATTTGATTCGACAGTGAGCCA	smear	failed	multi-match primers	0	0	0	0	0	0
8	81165682	81165683	8	112055109	112055110	SN065	-	-	INV	12	right of 8:81165783 pointing left	right of 8:112055210 pointing left	Sniffles	ccatttgagttgggcagtgttattc	tggcagttctccctaaatggacata	no product	failed		1	0	0	0	0	1
14	24442529	24442530	14	24485076	24485077	SN066	+	-	DEL	12	left of 14:24442429 pointing right	right of 14:24485177 pointing left	Sniffles	caggtgggacaagagactgagaaag	gtcattcaggagcaggttgttcagt	band w/ primer	short messy seq		0	1	0	0	0	0
16	46399047	46399048	16	46424635	46424636	SN067	-	-	INV	16	right of 16:46399148 pointing left	right of 16:46424736 pointing left	Sniffles	CAATTCAGTGATTCCTCTGGACTC	TGGAGTCCACTTAGTGAATCCTTTA	light band w/ primer	failed, messy seq	multi-match primers	0	1	0	0	0	0
22	39358682	39358683	22	39388617	39388618	SN068	+	-	DEL	18	left of 22:39358582 pointing right	right of 22:39388718 pointing left	Sniffles	GCCTGATGAAGGAGCTAAGTCCCTA	AGGTTCCTCTCCTGTGTGGTTTAGC	multiband w/ primer	failed		0	0	0	0	0	0
8	113316866	113316867	8	113317373	113317374	SN069	+	+	INVDUP	74	left of 8:113316766 pointing right	left of 8:113317273 pointing right	Sniffles	accatagagttgtgttggacgctaat	AGAATGATTACATCTGGGGCAAAGG		worked, short seq		1	1	1	1	1	1
16	46393226	46393227	16	46405299	46405300	SN070	+	-	DEL	10	left of 16:46393126 pointing right	right of 16:46405400 pointing left	Sniffles	TGCGTCGGTGAGCAATTCGATTCA	GACACGAATGGAAACCTGTGGAAC	smear	failed		0	0	0	0	0	0
16	46385801	46385802	16	46426313	46426314	SN071	-	-	INV	59	right of 16:46385902 pointing left	right of 16:46426414 pointing left	Sniffles	ACACGAATGGAAACCTGTGGAACC	CCATTCGATTCCAGACTCCATTCT	light band w/ primer	short messy seq		0	1	0	0	0	0
20	19330599	19330600	20	35761961	35761962	SN072	+	-	DEL	12	left of 20:19330499 pointing right	right of 20:35762062 pointing left	Sniffles	GCATACTTGCATTGACTCCACATTG	tctaaaattggatcgtcgtcatggt	no product	failed		1	0	0	0	0	1
17	39272119	39272120	17	39272582	39272583	SN073	-	-	INVDUP	47	right of 17:39272220 pointing left	right of 17:39272683 pointing left	Sniffles	CCTCTGGTGGGTCTGCTTCGATTC	ACTACAGGCCCAGGAGACTTCCAA		worked		1	1	1	1	1	1
15	20935076	20935077	15	21941705	21941706	SN074	-	+	DUP	10	right of 15:20935177 pointing left	left of 15:21941605 pointing right	Sniffles	aggtcataaaacacaaggtggagca	TCCCATCAAAAGAGCCACAGAATAA		worked	primer conflict	0	1	1	0	0	1
20	25463536	25463537	20	33823430	33823431	SN075	+	-	DEL	14	left of 20:25463436 pointing right	right of 20:33823531 pointing left	Sniffles	TGGGGAGAAATGTAGAAAATGCAGA	tcacagagcaagttggtaaggaagc		worked		1	1	1	1	1	1
1	120630580	120630581	1	145080163	145080164	SN076	+	+	INV	31	left of 1:120630480 pointing right	left of 1:145080063 pointing right	Sniffles	tgaccaaatatgaggagcaaggaga	ctcagcacatccttggagtaagagc	primer	failed		0	0	0	0	0	0
3	192536233	192536234	3	193003510	193003511	SN077	-	+	DUP	23	right of 3:192536334 pointing left	left of 3:193003410 pointing right	Sniffles	TGAGGGACCTTGTCATCATTCATTT	CCAGTCCAGTTTCTTTCCAAACTCA	no product	failed		1	0	0	0	0	1
1	168420940	168420941	8	30104064	30104065	SN078	+	-	TRA	17	left of 1:168420840 pointing right	right of 8:30104165 pointing left	Sniffles	ATCCCCAAGTGACTGTTCATGCTTA	atctaggaagtgaggagcgtctctg	multiband w/ primer	failed		0	0	0	0	0	0
11	55444020	55444021	11	55458153	55458154	SN079	-	-	INV	11	right of 11:55444121 pointing left	right of 11:55458254 pointing left	Sniffles	TTGCTAACACCATCAAAGTGGGAAT	tatttctccacatcctctccagcac	smear	failed		1	0	0	0	0	1
5	180376288	180376289	5	180431791	180431792	SN080	+	-	DEL	10	left of 5:180376188 pointing right	right of 5:180431892 pointing left	Sniffles	GCTTGTGATGGGAACTCTGAAATTG	AGTCTGAGGACCCAATACCCATTGT		worked	primer conflict	0	1	1	0	0	1
1	569498	569499	MT	8945	8946	SN081	+	-	TRA	14	left of 1:569398 pointing right	right of MT:9046 pointing left	Sniffles	TTACCCTATAGCACCCCCTCTACCC	CGTAGATGCCGTCGGAAATGGTGA		worked	primer conflict	0	1	1	0	0	1
1	17007337	17007338	1	145382659	145382660	SN082	-	+	DUP	12	right of 1:17007438 pointing left	left of 1:145382559 pointing right	Sniffles	TATCTTCTCACCCAGCATGCAAAAG	CATTCTGAAATGACAGTGGCAAACA		worked, 2 seqs		1	1	1	1	1	1
X	46810694	46810695	X	46830781	46830782	SN083	-	-	INV	88	right of X:46810795 pointing left	right of X:46830882 pointing left	Sniffles	AGTTGGTGTGCAGTGGATTTGAACT	AGACCTCACTCGGTGGTCAACTCTA	smear	messy seq		1	0	0	0	0	1
5	154483426	154483427	5	158308574	158308575	SN084	-	+	DUP	10	right of 5:154483527 pointing left	left of 5:158308474 pointing right	Sniffles	TGCACACATATGCAAACAGGGATAC	TGTGAACTGCCCCAAGCTACTTAGA	no product	failed		1	0	0	0	0	1
1	148954461	148954462	2	91821872	91821873	SN085	+	+	TRA	31	left of 1:148954361 pointing right	left of 2:91821772 pointing right	Sniffles	CGGTAACCTCCTCATCACAATCATC	ccctttcagtctgttcccagtaggt		short seq from 1 side	primer conflict	0	1	1	0	0	1
12	17923021	17923022	12	18013013	18013014	SN086	-	-	INV	15	right of 12:17923122 pointing left	right of 12:18013114 pointing left	Sniffles	cagcagcacatcaaaaagcttatcc	tatttctccacatcctctccagcac	smear	failed	primers match all over	0	0	0	0	0	0
6	32523375	32523376	6	32550247	32550248	SN087	+	-	DEL	10	left of 6:32523275 pointing right	right of 6:32550348 pointing left	Sniffles	CAGTGACCTATGCTGATGGAGATGAG	TCACTTTCCCGTTTGTTGACCTTT		failed	possible primer conflict	0	1	0	0	0	0
7	26251702	26251703	15	40854180	40854181	SN088	-	-	TRA	11	right of 7:26251803 pointing left	right of 15:40854281 pointing left	Sniffles	AGGGATTCCAACATTTTGCTAAGGA	GTCTGCCAAATCCTGAACAAGAAGA		worked		1	1	1	1	1	1
8	121677137	121677138	14	58502840	58502841	SN089	-	+	TRA	39	right of 8:121677238 pointing left	left of 14:58502740 pointing right	Sniffles	gcaatcaaaacagtggggtattgac	tgaatagaccaataacgggctctga	multiband w/ primer	failed	primers match all over	0	0	0	0	0	0
11	49734979	49734980	11	49751321	49751322	SN090	-	-	INV	17	right of 11:49735080 pointing left	right of 11:49751422 pointing left	Sniffles	ggcagagacacaaccagaaaagaga	gatggctgggtcaaatggtatttct	light smear	worked	primers match all over	0	1	1	0	0	1
7	149700534	149700535	7	153790551	153790552	SN091	-	-	INV	10	right of 7:149700635 pointing left	right of 7:153790652 pointing left	Sniffles	ccaactttagtacatgggcaggtga	TAGGGAGATGTAGTGGCTCCAAGTG	light smear	failed	primer conflict	0	1	0	0	0	0
17	43662003	43662004	17	62915039	62915040	SN092	+	-	DEL	16	left of 17:43661903 pointing right	right of 17:62915140 pointing left	Sniffles	GCTAGGGGTGTGAAAACAGATTGTG	GAAGGAGTCTCACTCTTGCAGCCC	light smear	seq from 1 side		1	1	1	1	1	1
7	1916576	1916577	22	23774214	23774215	SN093	+	+	TRA	26	left of 7:1916476 pointing right	left of 22:23774114 pointing right	Sniffles	TTGGTCATGTTAAACCAGCTCCTTC	tggatttgcttttattccagggcta		failed	primer conflict	0	0	0	0	0	0
8	121429792	121429793	8	121440241	121440242	SN094	+	+	INV	16	left of 8:121429692 pointing right	left of 8:121440141 pointing right	Sniffles	AACCAGAGCAACAAACAGAAACAGG	acagtcaagcggagagtcaaatcag		failed		1	1	0	1	0	1
8	75997095	75997096	8	86823872	86823873	SN095	-	-	INV	10	right of 8:75997196 pointing left	right of 8:86823973 pointing left	Sniffles	TCTTGGGGTCAATATGCTGAAAGAA	tattccatgctcacggttaggaaga		worked		1	1	1	1	1	1
15	20443893	20443894	15	21242628	21242629	SN096	-	-	INV	14	right of 15:20443994 pointing left	right of 15:21242729 pointing left	Sniffles	CCTCTGTCTCCTGCCTGTGTAACAT	tagcctcattgggttccctttgtat		worked		1	1	1	1	1	1
8	86832670	86832671	8	88646974	88646975	SN097	-	-	INV	19	right of 8:86832771 pointing left	right of 8:88647075 pointing left	Sniffles	attcgtgttgccaatgagatgattt	caaattaagttcagagcaggccaga	light band w/ primer	seq from 1 side		1	1	1	1	1	1
20	34474130	34474131	20	41290629	41290630	SN098	-	-	INV	19	right of 20:34474231 pointing left	right of 20:41290730 pointing left	Sniffles	CCTGCCACAAATGACTATCTGCTCT	TGGTAGTAACCAGTTTTGGCAAGGA		worked		1	1	1	1	1	1
6	116774819	116774820	15	40854180	40854181	SN099	+	-	TRA	20	left of 6:116774719 pointing right	right of 15:40854281 pointing left	Sniffles	GCAACTCTTCCAACGCTACTTTCAA	cgtgACTACCCGAACAGCTCTTAAA		worked		1	1	1	1	1	1
2	132134998	132134999	6	120517010	120517011	SN100	+	-	TRA	11	left of 2:132134898 pointing right	right of 6:120517111 pointing left	Sniffles	GCACCAAGCGGACCTAGTAGACAT	AGGGACTTAAACCACAGATGGTGCT		seq from 1 side		1	1	1	1	1	1
10	84969890	84969891	8	30598158	30598159	SU001	+	+	TRA	-1	left of 10:84969790 pointing right	left of 8:30598058 pointing right	Survivor2	tgcacatcacataggagaaacctca	aggcaattaaggagcagAAAACAgg	primer	failed		1	0	0	0	0	1
8	71891143	71891144	3	176721506	176721507	SU002	+	+	TRA	-1	left of 8:71891043 pointing right	left of 3:176721406 pointing right	Survivor2	tgcactttcttttgtgggtaacctg	cccaggaatataagcttggttccac	primer	failed		1	0	0	0	0	1
X	90683083	90683084	X	100190345	100190346	SU003	-	+	DUP	-1	right of X:90683184 pointing left	left of X:100190245 pointing right	Survivor2	ATGCATCTGATCCGAGAAGAAACAC	tggctcttatgaggatcatttgcat	primer	failed		1	0	0	0	0	1
8	120521003	120521004	8	142058028	142058029	SU004	+	-	DEL	-1	left of 8:120520903 pointing right	right of 8:142058129 pointing left	Survivor2	TTGCCTTCATTTGTCTTGCCAGTAT	tcattggctctgtttgatgatatgc		worked		1	1	1	1	1	1
Y	3712374	3712375	X	89531275	89531276	SU005	-	+	TRA	-1	right of Y:3712475 pointing left	left of X:89531175 pointing right	Survivor2	GTTTTTAACACATCAAGCCCCCAAT	AAGTCATCCTTGGTGGCTTGTAATG		worked, 2 seqs		1	1	1	1	1	1
8	75997118	75997119	8	90632339	90632340	SU006	-	+	DUP	-1	right of 8:75997219 pointing left	left of 8:90632239 pointing right	Survivor2	TCTTGGGGTCAATATGCTGAAAGAA	tccctagatccaaagatgccaaaat	no product	failed		1	0	0	0	0	1
MT	16089	16090	11	49883572	49883573	SU007	-	-	TRA	-1	right of MT:16190 pointing left	right of 11:49883673 pointing left	Survivor2	GGGAACGTGTGGGCTATTTAGGCT	AAAATTACAAGCAGCACCCATGTTG		worked		1	1	1	1	1	1
13	41497182	41497183	9	99999661	99999662	SU008	+	+	TRA	-1	left of 13:41497082 pointing right	left of 9:99999561 pointing right	Survivor2	CGCTAGAAGTCGTTCTGACCTAGCA	atactgcaatcgatccaagcacaac	no product	failed		1	0	0	0	0	1
12	66451371	66451372	8	73691263	73691264	SU009	-	-	TRA	-1	right of 12:66451472 pointing left	right of 8:73691364 pointing left	Survivor2	CTTTCTTCTCAGTGATGCACCCATT	GTGGCTGCAGTTTTATCCTTTGTTG	very light product w/ primer	failed		1	1	0	1	0	1
17	73190740	73190741	2	126459913	126459914	SU010	+	+	TRA	-1	left of 17:73190640 pointing right	left of 2:126459813 pointing right	Survivor2	ggAAAAGGAGAGGCATACATGGAAA	ATGCCAGCATCACCTTCAACATTAT	no product	failed		1	0	0	0	0	1
19	58938418	58938419	6	113730719	113730720	SU011	+	+	TRA	-1	left of 19:58938318 pointing right	left of 6:113730619 pointing right	Survivor2	GAGGGAATCAACAGATGCTGACACT	AAAAATTGTACAGggctgggtatgg	smear	failed		1	0	0	0	0	1
15	28392592	28392593	15	31123746	31123747	SU012	+	+	INV	-1	left of 15:28392492 pointing right	left of 15:31123646 pointing right	Survivor2	TGAAGATCATGTCTGTGGACTGGAA	ttctagggacgcttggtaactctcc		seq from 1 side	primer conflict	0	1	0	0	0	0
2	97733798	97733799	X	5294241	5294242	SU013	+	+	TRA	-1	left of 2:97733698 pointing right	left of X:5294141 pointing right	Survivor2	ctggtacctccatccttctctctcc	tttttaaggcagcacattcacaggt	no product	failed		1	0	0	0	0	1
8	72585109	72585110	19	38998818	38998819	SU014	+	-	TRA	-1	left of 8:72585009 pointing right	right of 19:38998919 pointing left	Survivor2	actttgcggtagaaatgcctatgCT	ccagtcacctctgtgacctcgttta	no product	failed		1	0	0	0	0	1
6	29766147	29766148	6	29922732	29922733	SU015	+	-	DEL	-1	left of 6:29766047 pointing right	right of 6:29922833 pointing left	Survivor2	tggattcctgaccatggataactgt	CTGCTTCTCCAGCCCTTCTCTCTGT		worked	primer conflict	0	1	0	0	0	0
5	128945024	128945025	5	137397392	137397393	SU016	+	-	DEL	-1	left of 5:128944924 pointing right	right of 5:137397493 pointing left	Survivor2	ATCTTCCTCTGACACAAATGCCTTG	TTCAGTGTAAACCTGGAACCAAGGA	no product	failed		1	0	0	0	0	1
2	68914792	68914793	5	64468045	64468046	SU017	+	+	TRA	-1	left of 2:68914692 pointing right	left of 5:64467945 pointing right	Survivor2	ACGGCTTCACAACACATGATTGATA	TGGAATCAAAGGCATGAGGAAGTAA		worked		1	1	1	1	1	1
2	10138621	10138622	2	29423625	29423626	SU018	+	+	INV	-1	left of 2:10138521 pointing right	left of 2:29423525 pointing right	Survivor2	TGGAGCAATTCACCCATTCTCTTTA	TTGTGAGAAGGATTGGGCAAAGAta	no product	failed		1	0	0	0	0	1
8	77747434	77747435	2	238962654	238962655	SU019	+	-	TRA	-1	left of 8:77747334 pointing right	right of 2:238962755 pointing left	Survivor2	tccaaatctttccttcctgtctgtg	gagaccagcctgaccaacaaaaata	no product	failed		1	0	0	0	0	1
7	125264220	125264221	12	74014367	74014368	SU020	+	-	TRA	-1	left of 7:125264120 pointing right	right of 12:74014468 pointing left	Survivor2	ATAGGCCAGCTGAACTCTTTTTGGA	acataagctttcatggggacaaaca	no product	failed		1	0	0	0	0	1
17	65854375	65854376	17	66211399	66211400	SU021	-	+	DUP	-1	right of 17:65854476 pointing left	left of 17:66211299 pointing right	Survivor2	TTGCTGACAAAGGTTTCCGTGTTAC	GCTTGAAGGGGAGAGAGATGGTTTA		2 seqs, 1 side messy		1	1	1	1	1	1
11	62880649	62880650	8	113422649	113422650	SU022	+	+	TRA	-1	left of 11:62880549 pointing right	left of 8:113422549 pointing right	Survivor2	tttcaaaacaccagcttctggattc	GGACATCCTCTGGTGGTCCTTTTAC	primer	failed	primer 1 multi-match	1	0	0	0	0	1
7	68758440	68758441	6	26625795	26625796	SU023	+	+	TRA	-1	left of 7:68758340 pointing right	left of 6:26625695 pointing right	Survivor2	gcaatgcatgaccttatgtgaatga	ccctaatggcatacaatgttgggta	no product	failed		1	0	0	0	0	1
X	78470669	78470670	X	90680677	90680678	SU024	+	+	INV	-1	left of X:78470569 pointing right	left of X:90680577 pointing right	Survivor2	CATGTTTTTACGTCCTGCATCTGTG	ttggtttagtgtgttgtgtggccta	smear	failed		1	0	0	0	0	1
X	30809320	30809321	X	30819753	30819754	SU025	+	-	DEL	-1	left of X:30809220 pointing right	right of X:30819854 pointing left	Survivor2	ctttgcctcactattcccttgtgc	aatgtagggcaaaacacaaggtgag	no product	failed		1	0	0	0	0	1
20	48642794	48642795	20	49168116	49168117	SU026	-	-	INV	-1	right of 20:48642895 pointing left	right of 20:49168217 pointing left	Survivor2	CTGAGGAGATAAGGTCCCAGCATTT	ATGACTGCTGGGTAAACTGATGAGC		seq from 1 side		1	1	1	1	1	1
MT	16463	16464	5	79948419	79948420	SU027	+	+	TRA	-1	left of MT:16363 pointing right	left of 5:79948319 pointing right	Survivor2	CTGTTCTTTCATGGGGAAGCAGAT	TGATCGTGGTGATTTAGAGGGTGAC		worked		1	1	1	1	1	1
8	22976441	22976442	8	23076952	23076953	SU028	+	+	INV	-1	left of 8:22976341 pointing right	left of 8:23076852 pointing right	Survivor2	GTTCTTTGCCTTCCTGTGGTCTTTT	AAACCACATCCTCTAAGCCACCAAT	very light product	short seq 1 side		1	1	1	1	1	1
8	73095161	73095162	7	105133270	105133271	SU029	+	+	TRA	-1	left of 8:73095061 pointing right	left of 7:105133170 pointing right	Survivor2	AGTGCTGTTGGTCACACTTTTTGTG	ctgggtgacgtagtaagacctgctc	smear	failed		1	0	0	0	0	1
X	86279961	86279962	20	18689127	18689128	SU030	+	-	TRA	-1	left of X:86279861 pointing right	right of 20:18689228 pointing left	Survivor2	aatgtgagcatattcctgcatctca	AAATGGCAACCATCTTTACCCAAAC	no product	failed		1	0	0	0	0	1
20	46843306	46843307	20	47214600	47214601	SU031	-	-	INV	-1	right of 20:46843407 pointing left	right of 20:47214701 pointing left	Survivor2	GGAAGCAGGAGCACACACTGTAGAT	GAGGGGAAGCAAAGGTGAACTCTAA	clean w/ primer	worked		1	1	1	1	1	1
6	32524786	32524787	6	32550675	32550676	SU032	-	+	DUP	-1	right of 6:32524887 pointing left	left of 6:32550575 pointing right	Survivor2	GGTGTGTGTGTAGAGTGTGGATTTGTC	CCATTCTGGATCAGGCCTGTGGAC		failed	primer conflict	0	1	0	0	0	0
3	172655961	172655962	3	182224419	182224420	SU033	-	+	DUP	-1	right of 3:172656062 pointing left	left of 3:182224319 pointing right	Survivor2	tccacccaaccttgtatagtgctgt	CCGGCATCTTAACTCCTTCATTAGC	primer	failed		1	0	0	0	0	1
8	71893880	71893881	3	178724880	178724881	SU034	-	+	TRA	-1	right of 8:71893981 pointing left	left of 3:178724780 pointing right	Survivor2	ccccagtaccagccaagagtctagt	cccagtacaaggaggttctcaaaca	primer	failed		1	0	0	0	0	1
19	53775276	53775277	19	53815676	53815677	SU035	+	+	INV	-1	left of 19:53775176 pointing right	left of 19:53815576 pointing right	Survivor2	CAATGCATCTCAGTTTCCATGTCAG	CTGCATTTACAGGCACTCTGTCTCA	primer	failed		1	0	0	0	0	1
X	21110230	21110231	14	40882900	40882901	SU036	+	+	TRA	-1	left of X:21110130 pointing right	left of 14:40882800 pointing right	Survivor2	atggaaaacagaaaaaggcagtggt	ctaagtcaagcccaatctcgtgtgt	primer	failed	primer 1 multi-match	0	0	0	0	0	0
11	55360089	55360090	11	55431551	55431552	SU037	-	-	INV	-1	right of 11:55360190 pointing left	right of 11:55431652 pointing left	Survivor2	aatccaggcagatatggtcaactca	CTCACCTTGGAGGCAATTCCTTATT	primer	failed		1	0	0	0	0	1
6	32469724	32469725	6	32507907	32507908	SU038	-	+	DUP	-1	right of 6:32469825 pointing left	left of 6:32507807 pointing right	Survivor2	tccaggagaaagtggaaatccatag	CACTACAACTGCATGGCCCCTTCT	multiband w/ primer	failed		1	0	0	0	0	1
8	76770900	76770901	2	194971565	194971566	SU039	-	+	TRA	-1	right of 8:76771001 pointing left	left of 2:194971465 pointing right	Survivor2	TGAACAGCTGCTAAGAGTCCACTGA	AACAACATTCCAGGTAGTCCCAGGT	light smear	failed	bad primer 2	0	0	0	0	0	0
16	204383	204384	16	215049	215050	SU040	-	+	DUP	-1	right of 16:204484 pointing left	left of 16:214949 pointing right	Survivor2	TCTTCGTCCTGATCGTTCTGAAATC	TACAGCCTCTAAAGTCCCAGCATCT	no product	failed	primer conflict	0	0	0	0	0	0
3	35672323	35672324	11	34865810	34865811	SU041	+	-	TRA	-1	left of 3:35672223 pointing right	right of 11:34865911 pointing left	Survivor2	TAAGGACAACCCAAGATGGAAAGGT	CCTAAAATCCCAGTTGCTTCCAGAC	primer	failed		1	0	0	0	0	1
8	81369954	81369955	8	126580891	126580892	SU042	+	+	INV	-1	left of 8:81369854 pointing right	left of 8:126580791 pointing right	Survivor2	ccagcttgactggctaatgagagtc	CAGTGAGAGTCGTGCAATCTGTGTT	primer	failed		1	0	0	0	0	1
2	179301238	179301239	2	179311999	179312000	SU043	+	-	DEL	-1	left of 2:179301138 pointing right	right of 2:179312100 pointing left	Survivor2	GTCTGGGCACCACAAACTTGTACTT	CAGCTCAAAAATATCATGGCTGAGG	smear	failed		1	0	0	0	0	1
7	140796842	140796843	15	66917070	66917071	SU044	+	+	TRA	-1	left of 7:140796742 pointing right	left of 15:66916970 pointing right	Survivor2	GACAGTGcctttccttatgggtgta	gaattgctcatcccttttccagaac	no product	failed		1	0	0	0	0	1
1	91561230	91561231	1	93514156	93514157	SU045	-	+	DUP	-1	right of 1:91561331 pointing left	left of 1:93514056 pointing right	Survivor2	cagccggagagttgtcttctaacaa	TTCATCAGGCCTTAGTGCAGATCAT	no product	failed	bad primer 1	0	0	0	0	0	0
14	106035861	106035862	14	106156026	106156027	SU046	+	-	DEL	-1	left of 14:106035761 pointing right	right of 14:106156127 pointing left	Survivor2	GAACTTATCCAGTCACGTCCcacac	GGGGTGTACGGCTTGTTTATGAgt	band w/ primer	failed	primer conflict	0	1	0	0	0	0
1	210891752	210891753	19	45732608	45732609	SU047	+	+	TRA	-1	left of 1:210891652 pointing right	left of 19:45732508 pointing right	Survivor2	ATCTGAGGCAGTGGATGTACTCAGG	AGTCCATGGTTTTAAGCTTCCTCCA	primer	failed		1	0	0	0	0	1
22	25684747	25684748	22	25981240	25981241	SU048	-	+	DUP	-1	right of 22:25684848 pointing left	left of 22:25981140 pointing right	Survivor2	ATCACTGGAATACGTTTTGGCTGAA	ccacaccacagaccatttacatcag	band w/ primer	failed	primer conflict	0	1	0	0	0	0
15	78955682	78955683	15	91591946	91591947	SU049	+	+	INV	-1	left of 15:78955582 pointing right	left of 15:91591846 pointing right	Survivor2	TAGAAAGCCCAGAAGTCCCACGTAT	TAATTGCATTTCCTCCTGTTGCATT	no product	failed		1	0	0	0	0	1
16	33485926	33485927	10	43330094	43330095	SU050	+	+	TRA	-1	left of 16:33485826 pointing right	left of 10:43329994 pointing right	Survivor2	gcaacttcacactaggatgcctgtt	GTTGCAAAAACAAATTccaccagaa		seq from 1 side	primer conflict	0	1	1	0	0	1
X	78470558	78470559	X	78695598	78695599	SU051	+	-	DEL	-1	left of X:78470458 pointing right	right of X:78695699 pointing left	Survivor2	TCAAACCCAAGAGAACAAACCATTG	GAAATTTGGATCCCAGTCTGCTCTT	no product	failed		1	0	0	0	0	1
19	44893647	44893648	19	44974705	44974706	SU052	-	-	INV	-1	right of 19:44893748 pointing left	right of 19:44974806 pointing left	Survivor2	gcaggataaaaccctcttggtgagt	GAGTAAGGGACACAAAGGGTCACAA		failed	primer conflict	0	1	0	0	0	0
8	71890334	71890335	3	178763532	178763533	SU053	-	-	TRA	-1	right of 8:71890435 pointing left	right of 3:178763633 pointing left	Survivor2	acccacaaaagaaagtgcatgagac	TCTGCTTGAATACTACTGGGGATGC		worked		1	1	1	1	1	1
6	160656530	160656531	4	68151001	68151002	SU054	+	+	TRA	-1	left of 6:160656430 pointing right	left of 4:68150901 pointing right	Survivor2	attggctgctctaaaatccttctgg	ttctcatacatcggcttcccaaata	no product	failed		1	0	0	0	0	1
14	41325758	41325759	8	87976381	87976382	SU055	+	+	TRA	-1	left of 14:41325658 pointing right	left of 8:87976281 pointing right	Survivor2	aaaccctgaccaacactgaaaaaca	caacctcctttccttgatccctaga		worked		1	1	1	1	1	1
17	47646431	47646432	1	31967757	31967758	SU056	+	+	TRA	-1	left of 17:47646331 pointing right	left of 1:31967657 pointing right	Survivor2	GGTAACAACGCCTCTCTGTAGCAAA	GGGAACTGAAACCTGAGTGGCTTAT	no product	failed		1	0	0	0	0	1
7	26246323	26246324	6	116774727	116774728	SU057	+	+	TRA	-1	left of 7:26246223 pointing right	left of 6:116774627 pointing right	Survivor2	AGAAGGTGTCTGCCCTGGGATATAG	GATCAAGACCTCTGGCAAATCCTCT	no product	failed	primer conflict	0	0	0	0	0	0
12	804288	804289	8	64004665	64004666	SU058	+	-	TRA	-1	left of 12:804188 pointing right	right of 8:64004766 pointing left	Survivor2	accccttgttggagaatgttttcat	gatggtcagttgagaagctgagagc	primer	failed		1	0	0	0	0	1
14	106477963	106477964	14	107095167	107095168	SU059	-	+	DUP	-1	right of 14:106478064 pointing left	left of 14:107095067 pointing right	Survivor2	GCTGCTGTTCCAATCTACTTCCTCA	GCACAAGAATGTGAGGAAGCAGAAC	light band w/ primer	worked	primer conflict	0	1	1	0	0	1
8	81370637	81370638	8	91005486	91005487	SU060	-	-	INV	-1	right of 8:81370738 pointing left	right of 8:91005587 pointing left	Survivor2	gcccagccATTCATTCTTGATAGAT	CTTAGCCAGCTTGGGAAtgtaaagg		seq from 1 side, messy		1	1	0	1	0	1
8	80029192	80029193	8	80136823	80136824	SU061	-	+	DUP	-1	right of 8:80029293 pointing left	left of 8:80136723 pointing right	Survivor2	ttgatttgcatttctctgatgacca	ttgtggtctgcgagacagattgtta	primer	failed		0	0	0	0	0	0
3	195971917	195971918	3	196346451	196346452	SU062	+	+	INV	-1	left of 3:195971817 pointing right	left of 3:196346351 pointing right	Survivor2	ACCACGAGCCCTCTGACTGGAATA	aatgttttctcccgtctcatggttt	primer	failed	possible bad primer1	0	0	0	0	0	0
15	73816429	73816430	12	72119669	72119670	SU063	-	-	TRA	-1	right of 15:73816530 pointing left	right of 12:72119770 pointing left	Survivor2	aaaagaaacctccgttcttgtctgc	tgcagaatatgttcagtccattcca	no product	failed		1	0	0	0	0	1
5	40662868	40662869	5	40710237	40710238	SU064	+	+	INV	-1	left of 5:40662768 pointing right	left of 5:40710137 pointing right	Survivor2	GCAccatcaatggatagactgggta	aactcccattcacaactgcttcaaa	primer	failed	primer 2 multimatch	0	0	0	0	0	0
1	80794938	80794939	1	106505976	106505977	SU065	-	-	INV	-1	right of 1:80795039 pointing left	right of 1:106506077 pointing left	Survivor2	gcatattaggtgcctttcagcttca	gagggaaggcatTAGTGTAGGCATT	no product	failed		1	0	0	0	0	1
18	14406915	14406916	13	19226978	19226979	SU066	+	+	TRA	-1	left of 18:14406815 pointing right	left of 13:19226878 pointing right	Survivor2	CAAGTTTAGTGAAGATGCGCAAAGG	TTCTTTTCCCATTCGTAGAGGcagt		worked		1	1	1	1	1	1
11	132145584	132145585	2	82825071	82825072	SU067	+	+	TRA	-1	left of 11:132145484 pointing right	left of 2:82824971 pointing right	Survivor2	tttacatgggccacttggatagttc	gatggtggggatggtaactgctatt	no product	failed		1	0	0	0	0	1
7	29672650	29672651	7	29785568	29785569	SU068	+	-	DEL	-1	left of 7:29672550 pointing right	right of 7:29785669 pointing left	Survivor2	tgtttgtcctagagggtttcccagt	ctccaattccaCaacgatgcttatc	no product	failed		1	0	0	0	0	1
20	25201300	25201301	20	52919414	52919415	SU069	+	-	DEL	-1	left of 20:25201200 pointing right	right of 20:52919515 pointing left	Survivor2	CCCCCAAGTAGAGTGAAAGAACAGC	CAAGGGTGGCCAATTTTCTTTATGT		worked		1	1	1	1	1	1
17	43670963	43670964	17	44329912	44329913	SU070	+	+	INV	-1	left of 17:43670863 pointing right	left of 17:44329812 pointing right	Survivor2	TGCACTCGTGTTGACCTCGTAAGTA	GGTATCTAAGCTGGGGTGATTGTCC		seq from 1 side, messy	primer conflict	0	1	0	0	0	0
8	114104800	114104801	8	114499157	114499158	SU071	-	-	INV	-1	right of 8:114104901 pointing left	right of 8:114499258 pointing left	Survivor2	ACAGAATGCCTAGCCCTGAACATTT	aactcgtagtctaggctgggctttg	no product	failed		1	0	0	0	0	1
10	78516979	78516980	7	75293303	75293304	SU072	+	+	TRA	-1	left of 10:78516879 pointing right	left of 7:75293203 pointing right	Survivor2	tctcactgtcggatttggaggttac	GTGGTTTGGCAAGTTCTGTTTTGAA	no product	failed		1	0	0	0	0	1
21	11035938	11035939	7	151941938	151941939	SU073	-	+	TRA	-1	right of 21:11036039 pointing left	left of 7:151941838 pointing right	Survivor2	AGCTAGCCAACCAGTAGAACGGTGA	actTTCTTAAACCCAGGTCGCAAAG		worked		1	1	1	1	1	1
10	26938419	26938420	10	27229307	27229308	SU074	+	+	INV	-1	left of 10:26938319 pointing right	left of 10:27229207 pointing right	Survivor2	ttttagtagtgactggcttgcacca	ACAAACTTCGGACTTGAGAGCACAG	smear	failed		1	0	0	0	0	1
2	89043849	89043850	3	189959286	189959287	SU075	+	+	TRA	-1	left of 2:89043749 pointing right	left of 3:189959186 pointing right	Survivor2	gcaatgctggattttgatagatgct	caggcaacaacaagcatgatgaata	primer	failed	primer 2 matches a couple of places	1	0	0	0	0	1
20	14743718	14743719	20	46985294	46985295	SU076	-	-	INV	-1	right of 20:14743819 pointing left	right of 20:46985395 pointing left	Survivor2	CAACTGCATGTACACCAGCTTTGTC	TCTACCTCCATCCTCCTCCATCTCT		worked		1	1	1	1	1	1
3	138970763	138970764	3	182224903	182224904	SU077	-	+	DUP	-1	right of 3:138970864 pointing left	left of 3:182224803 pointing right	Survivor2	AGACCCCTAGAGCCAAGATCATCAG	TTAACCAGCCAACCACAGAACAGAT		worked		1	1	1	1	1	1
3	180819657	180819658	3	191797630	191797631	SU078	+	+	INV	-1	left of 3:180819557 pointing right	left of 3:191797530 pointing right	Survivor2	GGGTCCTTGTGTAGCCTTGGATAAG	GCTTGACGTGCCATGTTATTCTTTC	no product	failed		1	0	0	0	0	1
6	32625735	32625736	6	32722621	32722622	SU079	-	+	DUP	-1	right of 6:32625836 pointing left	left of 6:32722521 pointing right	Survivor2	ATCCTTGTGGTCCTGGAAATGACTT	tcaaatgatcccaacctaacagcag		worked	possible conflicts with hap		1	1	0	0	1
11	103792547	103792548	6	108906536	108906537	SU080	+	+	TRA	-1	left of 11:103792447 pointing right	left of 6:108906436 pointing right	Survivor2	gctcTATTGCCCTCTCTTGGTAGGA	TGCCATCTGGAAACTTGCATTTACT	no product	failed		1	0	0	0	0	1
6	32490601	32490602	6	32526414	32526415	SU081	+	-	DEL	-1	left of 6:32490501 pointing right	right of 6:32526515 pointing left	Survivor2	TGGAACCTTAACTGATCCCAACCAT	gactgtggcaATTTAGtcaatgcaag	no product	failed		1	0	0	0	0	1
17	38112361	38112362	6	162657280	162657281	SU082	+	+	TRA	-1	left of 17:38112261 pointing right	left of 6:162657180 pointing right	Survivor2	GGGATCAAGGATGGGGACTGTAATA	ACCCTTCAGTGTGATCAAAAACAGC	no product	failed		1	0	0	0	0	1
8	114104646	114104647	8	119651167	119651168	SU083	-	-	INV	-1	right of 8:114104747 pointing left	right of 8:119651268 pointing left	Survivor2	TAAACAGAATGCCTAGCCCTGAACA	CAGAAGGGGGAAATCACTCAGAACT	no product	failed		1	0	0	0	0	1
X	78472692	78472693	8	113072325	113072326	SU084	-	+	TRA	-1	right of X:78472793 pointing left	left of 8:113072225 pointing right	Survivor2	atgggatcaatgcaacaagatgagt	TGGGATTTTGCATCGTTATTCTGTT	primer	failed		1	0	0	0	0	1
8	75997176	75997177	8	90632338	90632339	SU085	+	+	INV	-1	left of 8:75997076 pointing right	left of 8:90632238 pointing right	Survivor2	TCCAAAACAGGACAAGCAAAGAGAC	tccctagatccaaagatgccaaaat	no product	failed		1	0	0	0	0	1
16	55794261	55794262	16	55867048	55867049	SU086	+	+	INV	-1	left of 16:55794161 pointing right	left of 16:55866948 pointing right	Survivor2	aaatcctggaacgctatGAAACACA	AGCTGCTCCAAGTCCAAGTCCTAAT	very light band	failed		1	1	0	1	0	1
20	33757780	33757781	20	35996745	35996746	SU087	-	+	DUP	-1	right of 20:33757881 pointing left	left of 20:35996645 pointing right	Survivor2	TACCTCTGGGGAATAGGATTGGGTA	tttgttgcttgtgctctaggtgttg		worked		1	1	1	1	1	1
2	148136138	148136139	2	196459125	196459126	SU088	+	-	DEL	-1	left of 2:148136038 pointing right	right of 2:196459226 pointing left	Survivor2	atgtaAAATAGGAgctgggcatggt	TGTCATTTTCCCAGAACATTCAACC	smear	failed		1	0	0	0	0	1
19	14506923	14506924	19	14877878	14877879	SU089	+	+	INV	-1	left of 19:14506823 pointing right	left of 19:14877778 pointing right	Survivor2	TAGATCCTTTCCTGGGGATCAGAAA	CATGGGAGCTGGACTTTCTGACTAA	no product	failed		1	0	0	0	0	1
3	170340176	170340177	17	74374472	74374473	SU090	+	+	TRA	-1	left of 3:170340076 pointing right	left of 17:74374372 pointing right	Survivor2	CACAGTAATTTGCCACAGGACACAG	TCCTGGTTTGTGTTCATTTGGGTAG	no product	failed		1	0	0	0	0	1
X	91268282	91268283	8	112363339	112363340	SU091	+	+	TRA	-1	left of X:91268182 pointing right	left of 8:112363239 pointing right	Survivor2	GACTTGTGGGTGTGCAAAGGTAGAC	GATGTATCCCTAGGCAAATGTGCAA	primer	failed		1	0	0	0	0	1
7	15394369	15394370	4	115442327	115442328	SU092	+	+	TRA	-1	left of 7:15394269 pointing right	left of 4:115442227 pointing right	Survivor2	TTCAACTTAGCCCCACAACTCAGTC	acggtataCTCCATGGTATGCGTGt	no product	failed		1	0	0	0	0	1
X	103221816	103221817	8	113071328	113071329	SU093	-	+	TRA	-1	right of X:103221917 pointing left	left of 8:113071228 pointing right	Survivor2	ATCACTGCAAGGAGCTGAGTGACTT	tctacaaggctggggagattttcat	primer	failed		1	0	0	0	0	1
5	711969	711970	5	795881	795882	SU094	+	-	DEL	-1	left of 5:711869 pointing right	right of 5:795982 pointing left	Survivor2	TACTCCTATTTCCCAGTGCCATGTG	GCATCCATCTCTGTCATCATCTTCA		worked	primer conflict	0	1	1	0	0	1
3	138974507	138974508	3	174987926	174987927	SU095	-	+	DUP	-1	right of 3:138974608 pointing left	left of 3:174987826 pointing right	Survivor2	atgTAAAACACCAAGGGGTGGGTAG	agggcagtaagtttgttgacagcag	no product	failed		1	0	0	0	0	1
20	59672811	59672812	15	92839376	92839377	SU096	-	+	TRA	-1	right of 20:59672912 pointing left	left of 15:92839276 pointing right	Survivor2	GAAGTCAGCCTTGCTAAGTGTTGGA	CAAAAACCAGAAGCTAATTGCCACA		failed messy		1	1	0	1	0	1
7	64290015	64290016	19	21480435	21480436	SU097	+	+	TRA	-1	left of 7:64289915 pointing right	left of 19:21480335 pointing right	Survivor2	tggcctaccaagtgttctattgagg	tgaaaggagttcATCCCACTGAAAA	primer	failed		1	0	0	0	0	1
16	32503564	32503565	7	61848994	61848995	SU098	+	+	TRA	-1	left of 16:32503464 pointing right	left of 7:61848894 pointing right	Survivor2	caatttggaaacaatgcttttctgg	gggatattcccattttcaccatttg	primer	failed	primer conflict	0	0	0	0	0	0
21	28927012	28927013	1	167866902	167866903	SU099	+	+	TRA	-1	left of 21:28926912 pointing right	left of 1:167866802 pointing right	Survivor2	TTCTTTAGGAGCCCAGTTCATGCTT	CTGATGGCCAAAAAGGAATTAGGag	smear	failed		1	0	0	0	0	1
17	39395462	39395463	17	39406830	39406831	SU100	-	+	DUP	-1	right of 17:39395563 pointing left	left of 17:39406730 pointing right	Survivor2	TGAGTCCACAATGAATTCTCAAGCA	ccctcccaaagtgctaggattacag	smear	failed		1	0	0	0	0	1
8	81380348	81380349	8	118679499	118679500	I001	-	-	INV	16	right of 8:81380449 pointing left	right of 8:118679600 pointing left	Intersect	ccaccacacctggctaatttttgta	cactccacctggcTGATATTGTTTC	smear	failed		1	0	0	0	0	1
8	80086763	80086764	17	39542193	39542194	I002	+	+	TRA	64	left of 8:80086663 pointing right	left of 17:39542093 pointing right	Intersect	GGATATCACCACCGATCCCACAGA	AGGTACATGGTAGGCGTGTGTGTA	light band w/ primer	worked, some messy seq	primer 1 matches all over	0	1	0	0	0	0
6	116774304	116774305	7	26251701	26251702	I003	-	-	TRA	19	right of 6:116774405 pointing left	right of 7:26251802 pointing left	Intersect	tctTGCCATTACTGGTATCCTGCAT	ACTGCCAACACCTCTAACCATCTGA		worked, 2 seqs		1	1	1	1	1	1
5	154325257	154325258	5	157746040	157746041	I004	-	-	INV	18	right of 5:154325358 pointing left	right of 5:157746141 pointing left	Intersect	CAACAGCATGACAGAAACATGAACC	AACAGAGACTCCGGAAGCAGAAGTT		worked		1	1	1	1	1	1
1	72766325	72766326	1	72811840	72811841	I005	+	-	DEL	18	left of 1:72766225 pointing right	right of 1:72811941 pointing left	Intersect	ATGAGCCTTTCTAGGCAGCTTTGTT	AACAGAAAGACCAAGGTGATGCAAG		worked		1	1	1	1	1	1
20	16227795	16227796	20	55906660	55906661	I006	+	-	DEL	13	left of 20:16227695 pointing right	right of 20:55906761 pointing left	Intersect	GAGCTGTCAGACCTCCTCCTTTCTC	TGCAAAATGCCCACTTTATGTTTTC		worked		1	1	1	1	1	1
8	72666994	72666995	8	72711183	72711184	I007	-	+	DUP	10	right of 8:72667095 pointing left	left of 8:72711083 pointing right	Intersect	TCCTTCCAACTTCTTTACCCAGAGC	TCTTCTGAATATGGGGTCTGTGCAT	primer	failed		1	0	0	0	0	1
8	121566036	121566037	8	123905824	123905825	I008	+	-	DEL	15	left of 8:121565936 pointing right	right of 8:123905925 pointing left	Intersect	TGCATGTCCTCTGGATACAGCATTA	GGCAGCTGGATCTTTATTTCATGGT		worked		1	1	1	1	1	1
10	71184339	71184340	10	71811652	71811653	I009	-	-	INV	27	right of 10:71184440 pointing left	right of 10:71811753 pointing left	Intersect	AAATGCAGTGCCTCAAACAAGAGAG	GGAGAGGCAGATGTATGTTTTGGTG		worked		1	1	1	1	1	1
8	115851296	115851297	14	45993847	45993848	I010	-	+	TRA	22	right of 8:115851397 pointing left	left of 14:45993747 pointing right	Intersect	AAGCTGGTACTGGGTAGGGTCACTC	ttttgatggggtatagggattgcat	multibanded	failed		1	1	0	1	0	1
8	87386932	87386933	X	102225914	102225915	I011	-	-	TRA	31	right of 8:87387033 pointing left	right of X:102226015 pointing left	Intersect	agaagtgggaaaaTGGGACCAAGTA	catagtaagaggcacctttgctcca	multibanded	failed		1	1	0	1	0	1
8	128930951	128930952	8	132193644	132193645	I012	+	-	DEL	13	left of 8:128930851 pointing right	right of 8:132193745 pointing left	Intersect	TGCGTGTAAGAGTGGGTAATTTTGG	taaaatggtcagacttcccaaagca		worked		1	1	1	1	1	1
X	7623883	7623884	X	7673882	7673883	I013	+	-	DEL	47	left of X:7623783 pointing right	right of X:7673983 pointing left	Intersect	Ggatggctaaaaagtgttggaaagg	tagcctcttggaccctcagtcttct		worked		1	1	1	1	1	1
10	29796191	29796192	10	33278691	33278692	I014	+	-	DEL	17	left of 10:29796091 pointing right	right of 10:33278792 pointing left	Intersect	GCAGAGTTGTTTTGACACCAAGGAC	ATAACCATAACAGGCCAAGGCAAAG		worked		1	1	1	1	1	1
20	33212420	33212421	20	41941735	41941736	I015	+	+	INV	11	left of 20:33212320 pointing right	left of 20:41941635 pointing right	Intersect	TCTAAGGCTAGGCTCCAGGAAGAGA	TGATAAAAGCCACTTGAGGGGTAGG		worked		1	1	1	1	1	1
14	57046263	57046264	14	84871570	84871571	I016	+	-	DEL	11	left of 14:57046163 pointing right	right of 14:84871671 pointing left	Intersect	AGGAACTCAAATTTCCCGACTCATC	TTTGTGGTTCTAACAGCGCAACATA		worked		1	1	1	1	1	1
5	147831566	147831567	8	133497676	133497677	I017	+	-	TRA	23	left of 5:147831466 pointing right	right of 8:133497777 pointing left	Intersect	AGGGATAGTTTTGGGTTCTGACTGC	GCAACACATAAAACAGGCAATTGGT		worked		1	1	1	1	1	1
8	116747232	116747233	8	121079775	121079776	I018	+	+	INV	25	left of 8:116747132 pointing right	left of 8:121079675 pointing right	Intersect	ACATTGTTGGCTCCTTCATGTCATT	GACCCAACAGGGTAGACTTGAGACA		worked		1	1	1	1	1	1
8	90944165	90944166	8	112053317	112053318	I019	+	-	DEL	35	left of 8:90944065 pointing right	right of 8:112053418 pointing left	Intersect	tttgtcacatgcagctaaagaggtg	ATTCAATGTGCATTTGGATTTACGC		worked		1	1	1	1	1	1
5	157758347	157758348	5	158295162	158295163	I020	-	-	INV	22	right of 5:157758448 pointing left	right of 5:158295263 pointing left	Intersect	aactaacatggtgaggttgcagagg	GAAAATTGTGCAAACACCCAGAGAC		worked		1	1	1	1	1	1
5	157705034	157705035	8	109779851	109779852	I021	-	+	TRA	25	right of 5:157705135 pointing left	left of 8:109779751 pointing right	Intersect	agaaaggaaccatcttttcctgtgc	tggccccattcctttaattatcatc		worked		1	1	1	1	1	1
20	25456491	25456492	20	48878146	48878147	I022	-	+	DUP	12	right of 20:25456592 pointing left	left of 20:48878046 pointing right	Intersect	AGAACTAACCCACTGACCCCTGTTG	ggctccccgttactctctgaataaa		worked		1	1	1	1	1	1
8	72667067	72667068	8	76002220	76002221	I023	+	+	INV	15	left of 8:72666967 pointing right	left of 8:76002120 pointing right	Intersect	TTCTGCTATTGGGGTTGACTTGAAA	GGTTGGCATATCTATTCCCAGGCTA	primer	failed		1	0	0	0	0	1
8	104659141	104659142	8	104707479	104707480	I024	-	+	DUP	12	right of 8:104659242 pointing left	left of 8:104707379 pointing right	Intersect	acacatacacctacccaaggctgaa	aatgggagtattcagtagcccagga	smear	failed		1	0	0	0	0	1
4	40360310	40360311	4	40409129	40409130	I025	+	-	DEL	15	left of 4:40360210 pointing right	right of 4:40409230 pointing left	Intersect	GAATGGAAGGCCAAAGAGACATACC	ACAGGAAGAACATGCACAATGACAA		worked		1	1	1	1	1	1
10	47654518	47654519	10	51489019	51489020	I026	+	+	INV	23	left of 10:47654418 pointing right	left of 10:51488919 pointing right	Intersect	AACAGCACCAAGAACTGCAATTACC	AAATGAGCGGAGgatagggagagag	band w/primer	seq from 1 side		1	1	1	1	1	1
6	7596601	7596602	6	8269006	8269007	I027	-	-	INV	37	right of 6:7596702 pointing left	right of 6:8269107 pointing left	Intersect	TGAGGGAGAAAACCAACCATGACTA	TTAATGGGCTTGGTTCTAAGCAGGT		worked		1	1	1	1	1	1
2	97860235	97860236	2	98162555	98162556	I028	-	-	INV	12	right of 2:97860336 pointing left	right of 2:98162656 pointing left	Intersect	TTATGCCAATTCAACCACTGTTTCC	AGCAGGAAACAATGGTGTAATTGGA	light band w/ primer	failed	primer 1 matches 2 places	0	1	0	0	0	0
12	56990097	56990098	15	39994625	39994626	I029	+	-	TRA	22	left of 12:56989997 pointing right	right of 15:39994726 pointing left	Intersect	CCCTCAGGTGTGTAGAAGGGAAGAT	GAAGGTGTAGGCATTGTGCTGTTTC	primer	failed		1	0	0	0	0	1
20	14798588	14798589	20	15256347	15256348	I030	+	-	DEL	13	left of 20:14798488 pointing right	right of 20:15256448 pointing left	Intersect	GACTCCTTGGGCTGTCTTAGCTGAT	TAACACCCACCTCCTCAATTTCTGA		worked		1	1	1	1	1	1
MT	0	1	MT	16570	16571	I031	-	+	DUP	632	right of MT:101 pointing left	left of MT:16470 pointing right	Intersect	GTGTGTGTGTGCTGGGTAGGATG	TCACACATCAACTGCAACTCCAAA		worked		1	1	1	1	1	1
X	115137998	115137999	X	115152944	115152945	I032	+	-	DEL	20	left of X:115137898 pointing right	right of X:115153045 pointing left	Intersect	aatggcagatatgggattcaaacaa	tggcaatgtctttttgttcatctca		worked		1	1	1	1	1	1
8	88901587	88901588	8	120151542	120151543	I033	+	-	DEL	24	left of 8:88901487 pointing right	right of 8:120151643 pointing left	Intersect	ATGGTCAACTGCATATCTTGGATGG	gatggagcttgaaaccgttatcctc		worked		1	1	1	1	1	1
16	46392301	46392302	16	46404221	46404222	I034	-	+	DUP	13	right of 16:46392402 pointing left	left of 16:46404121 pointing right	Intersect	TGGAGTCCAGAGTAATCACTGAACT	TCCGTTCATTGACAATTTGATTCC		worked	primer conflict	0	1	1	0	0	1
3	3852722	3852723	3	26060890	26060891	I035	+	-	DEL	18	left of 3:3852622 pointing right	right of 3:26060991 pointing left	Intersect	GGTGTGATCCTTAGGGAGATGAACC	CTAAACTTTGGGGGCTGCAGTATTC		worked, 2 seqs		1	1	1	1	1	1
8	69578957	69578958	8	112054720	112054721	I036	+	+	INV	26	left of 8:69578857 pointing right	left of 8:112054620 pointing right	Intersect	GGCAAGTGTATGAGGCACATTAGGa	TTTCAAAATGCGTAAATCCAAATGC	very light band	worked, seq 1 side		1	1	1	1	1	1
1	168186186	168186187	1	182274316	182274317	I037	-	-	INV	11	right of 1:168186287 pointing left	right of 1:182274417 pointing left	Intersect	TCCACAAGCACTACCTGACCCTTTA	aatgctgactacctttggtgggagt	no product	failed		1	0	0	0	0	1
12	99578452	99578453	12	99596383	99596384	I038	+	-	DEL	12	left of 12:99578352 pointing right	right of 12:99596484 pointing left	Intersect	aagcacattttgggaaacTCATGTC	TCACCCTACCCTCCTGAAACTCTTT		worked		1	1	1	1	1	1
8	88474744	88474745	8	121980852	121980853	I039	+	+	INV	67	left of 8:88474644 pointing right	left of 8:121980752 pointing right	Intersect	atgtttatgccttgatccccagaac	AGTCAGAAGCAGCCAAGTAGGAGGT		worked		1	1	1	1	1	1
20	32954464	32954465	20	37597982	37597983	I040	-	+	DUP	65	right of 20:32954565 pointing left	left of 20:37597882 pointing right	Intersect	GCTGAGAGAAAAACACTCCCAACAA	CCTCGTAGGCACTTTTCTGGATTCT		worked		1	1	1	1	1	1
5	157891766	157891767	5	158230078	158230079	I041	-	-	INV	11	right of 5:157891867 pointing left	right of 5:158230179 pointing left	Intersect	TAGTGTTAAGGGTTCGGCACACAGT	GTGAGCAGGAAGGTCATCATTCACT		failed		1	1	0	1	0	1
3	16388248	16388249	3	18874271	18874272	I042	-	-	INV	25	right of 3:16388349 pointing left	right of 3:18874372 pointing left	Intersect	CATCAGAGAGCTGTACACTGGGACA	AGCACTTCATACCCTCCTTCCTCAG		worked		1	1	1	1	1	1
8	90439958	90439959	8	110270684	110270685	I043	+	+	INV	28	left of 8:90439858 pointing right	left of 8:110270584 pointing right	Intersect	AGCCAACTCACCTAATTCACACCAA	tcagcaaacttaaggggtcagacag		worked		1	1	1	1	1	1
8	75356125	75356126	8	92167380	92167381	I044	+	-	DEL	23	left of 8:75356025 pointing right	right of 8:92167481 pointing left	Intersect	cgcagctactgaggactacttcctg	ctgggaagagtagggaagaggtgag		worked		1	1	1	1	1	1
20	42553421	42553422	20	47744170	47744171	I045	+	-	DEL	37	left of 20:42553321 pointing right	right of 20:47744271 pointing left	Intersect	TGAGAGGCCTAAAAATGAACAGCAG	agctttagccccagtggaaacataa		worked, 2 seqs		1	1	1	1	1	1
8	112574225	112574226	8	128227083	128227084	I046	-	-	INV	135	right of 8:112574326 pointing left	right of 8:128227184 pointing left	Intersect	cccaaaggtaacttctcgcaaaact	ACACTTGTGATTACCCAGGCACACT		worked		1	1	1	1	1	1
8	116683596	116683597	8	120980688	120980689	I047	-	+	DUP	346	right of 8:116683697 pointing left	left of 8:120980588 pointing right	Intersect	TAATTCAGTTTGTGCCATGCAAATG	GTGACACTGTATTCCAGGCTGCTTT		worked		1	1	1	1	1	1
8	72711183	72711184	8	76002221	76002222	I048	+	+	INV	180	left of 8:72711083 pointing right	left of 8:76002121 pointing right	Intersect	TGTTTTGGGAGAATCTAGGCTTCCT	GGTTGGCATATCTATTCCCAGGCTA		worked		1	1	1	1	1	1
17	36350388	36350389	17	36406169	36406170	I049	+	+	INV	14	left of 17:36350288 pointing right	left of 17:36406069 pointing right	Intersect	AAGTTCACGTTGTCCAGTTTTGAGG	acaaggcacaataagcagcaagaag		worked, 2 seqs		1	1	1	1	1	1
8	88074173	88074174	8	118202240	118202241	I050	+	+	INV	45	left of 8:88074073 pointing right	left of 8:118202140 pointing right	Intersect	TGAAGTGCATTAACAGCAGATTCCA	TTGCCTTGGCATAAAACAGACACTT		worked		1	1	1	1	1	1
4	170632505	170632506	4	170768474	170768475	I051	+	-	DEL	15	left of 4:170632405 pointing right	right of 4:170768575 pointing left	Intersect	TACAGAGTTTTACTCCCCCGTCCA	AATGCATCCTGCACAGATAAAGGAA		worked		1	1	1	1	1	1
7	70420969	70420970	7	70438888	70438889	I052	+	+	INV	48	left of 7:70420869 pointing right	left of 7:70438788 pointing right	Intersect	tgagcacttgccataatacatgcac	TTGtgaaactgtgtccccaaagagt		worked		1	1	1	1	1	1
11	1915279	1915280	11	1936956	1936957	I053	+	-	DEL	35	left of 11:1915179 pointing right	right of 11:1937057 pointing left	Intersect	gagcgataaatgaagggatgggtag	GCATTCACTCTCACCTTCACCACTT		worked		1	1	1	1	1	1
9	8622472	8622473	9	8633884	8633885	I054	+	-	DEL	23	left of 9:8622372 pointing right	right of 9:8633985 pointing left	Intersect	GCTCTGTCATCTCCACCTAGAGCAA	AAGGCACAACTTCTCAGTGAACAGC		worked		1	1	1	1	1	1
18	6006200	6006201	18	6023412	6023413	I055	-	+	DUP	27	right of 18:6006301 pointing left	left of 18:6023312 pointing right	Intersect	TCCCCTTCACACCAGATTTTACTCA	GCTGTTAGTCCTCAGGCagtggtta		worked		1	1	1	1	1	1
8	81424748	81424749	8	126617348	126617349	I056	-	+	DUP	22	right of 8:81424849 pointing left	left of 8:126617248 pointing right	Intersect	AAAACCATGGGAGTGAAACAGATGA	AGCCACAGACCTCCCTTAGTTTCTG		worked		1	1	1	1	1	1
4	116166907	116166908	4	116177180	116177181	I057	+	-	DEL	35	left of 4:116166807 pointing right	right of 4:116177281 pointing left	Intersect	TTACCCACTTTGTCCCAGTTTCTGA	agacacccactagctgcttttagcc		worked		1	1	1	1	1	1
2	42051404	42051405	4	66413937	66413938	I058	-	+	TRA	40	right of 2:42051505 pointing left	left of 4:66413837 pointing right	Intersect	cttcataacattgccagcatttggt	tgcattagaaagtgaccctgaaagg		worked, 1 side messy seq		1	1	1	1	1	1
8	117251664	117251665	8	128931902	128931903	I059	+	-	DEL	14	left of 8:117251564 pointing right	right of 8:128932003 pointing left	Intersect	TACCAACAAAGAAATGCTGGCTGTT	ACAGATAACACAGGACCCCCTCAAT		worked		1	1	1	1	1	1
1	229354404	229354405	5	137884949	137884950	I060	+	-	TRA	20	left of 1:229354304 pointing right	right of 5:137885050 pointing left	Intersect	CCCCAAGAAACATGTCCCTAAGAAG	TCCTTCGTCCCATTTAATCCAATTC	no product	failed		1	0	0	0	0	1
11	1915273	1915274	11	1961084	1961085	I061	-	-	INV	20	right of 11:1915374 pointing left	right of 11:1961185 pointing left	Intersect	ggccacattactttccatcattcaa	AAACTGCACGATTCCATCCATCTTA		worked, seq only from 1 side		1	1	1	1	1	1
3	192875331	192875332	3	192885408	192885409	I062	+	-	DEL	37	left of 3:192875231 pointing right	right of 3:192885509 pointing left	Intersect	TTGGGTGAAATGCTGTAGAACCACT	AGAGCAGTGAGGTGACAGGGTAATG		worked		1	1	1	1	1	1
16	21594442	21594443	16	22710752	22710753	I063	+	+	INV	20	left of 16:21594342 pointing right	left of 16:22710652 pointing right	Intersect	aatacaaaaattagctgggcgtggt	ttactcactgggcaccctgtacttc	smear	failed		0	0	0	0	0	0
7	117142893	117142894	7	131651806	131651807	I064	-	+	DUP	113	right of 7:117142994 pointing left	left of 7:131651706 pointing right	Intersect	TACACTCATCTGCCCTCTAGGCATC	AAGAAAAGCTGAATGGGTTTGTGTG	no product	failed		1	0	0	0	0	1
20	47506339	47506340	20	53267366	53267367	I065	+	+	INV	15	left of 20:47506239 pointing right	left of 20:53267266 pointing right	Intersect	TTTGCATGGGGGAATCCTTTAATAC	AAAGTCCTGGCTAATTGTGTGGTCA		worked		1	1	1	1	1	1
20	35982192	35982193	20	45039422	45039423	I066	-	+	DUP	11	right of 20:35982293 pointing left	left of 20:45039322 pointing right	Intersect	accttgattgagtcccttctcaggt	ccggaggctgttatacacattacca		worked		1	1	1	1	1	1
10	61719883	61719884	10	61784563	61784564	I067	+	-	DEL	15	left of 10:61719783 pointing right	right of 10:61784664 pointing left	Intersect	ATCAAAGAGCTTCGTGGTGAGTCTG	CAACCATTGGCATAATTCTGAGAGC		worked		1	1	1	1	1	1
5	147868347	147868348	5	157896239	157896240	I068	+	-	DEL	17	left of 5:147868247 pointing right	right of 5:157896340 pointing left	Intersect	gagagaaaTCACAGGCAGGTCAGAG	ccccaccttcaaaatttctacatcc		worked		1	1	1	1	1	1
X	155032960	155032961	X	155216351	155216352	I069	-	+	DUP	19	right of X:155033061 pointing left	left of X:155216251 pointing right	Intersect	tatttagagaaatccagcccccaga	AACTGCACAAAGACCTTCAGACACC		worked, some messy seq		1	1	1	1	1	1
8	76021448	76021449	8	121562752	121562753	I070	+	+	INV	18	left of 8:76021348 pointing right	left of 8:121562652 pointing right	Intersect	TTTGCCTGAAGCATATAAGGAGCAT	GCAATGCCAACTCAAAGAAAAAGTG		worked		1	1	1	1	1	1
5	154292930	154292931	8	98642134	98642135	I071	+	-	TRA	23	left of 5:154292830 pointing right	right of 8:98642235 pointing left	Intersect	AAGTACATCCAGGAAGGCATTCACA	ATGCTGCCTACTCACAAATCCTTGA		worked		1	1	1	1	1	1
3	37979114	37979115	3	38340261	38340262	I072	-	+	DUP	24	right of 3:37979215 pointing left	left of 3:38340161 pointing right	Intersect	GCACCGATTCAGAGCTTCACATACT	gtgctgttgtgcccttagtacatca	no product	failed		1	0	0	0	0	1
14	57212496	57212497	17	74808616	74808617	I073	+	-	TRA	30	left of 14:57212396 pointing right	right of 17:74808717 pointing left	Intersect	TTATGAGGAAGTTGGAATGCCTGAA	gggTTTCTTGTTTCTGCTTCTGACA		worked		1	1	1	1	1	1
5	158707342	158707343	5	158719239	158719240	I074	+	+	INV	22	left of 5:158707242 pointing right	left of 5:158719139 pointing right	Intersect	TGGTCAAGGAATAATTTTGGAGGAGA	tgcatccagttttgttctttttgct		worked	primer 2 multimatch	0	1	1	0	0	1
7	81789168	81789169	10	60902927	60902928	I075	+	+	TRA	32	left of 7:81789068 pointing right	left of 10:60902827 pointing right	Intersect	TGTTGACATTGCCTATTTTGGCTTT	caacactcttccctcagcatttgat		worked		1	1	1	1	1	1
8	72711599	72711600	8	91660990	91660991	I076	-	-	INV	61	right of 8:72711700 pointing left	right of 8:91661091 pointing left	Intersect	GGGTGGGACAAACAAACCATTTAGT	tgacccaagagtagctcatttccag		worked		1	1	1	1	1	1
1	88972810	88972811	17	32063854	32063855	I077	-	-	TRA	20	right of 1:88972911 pointing left	right of 17:32063955 pointing left	Intersect	CAGGTAGACATCCACCAGCTCAGAT	ATCCCATTCAGGAAAGAGACAGGAG		worked		1	1	1	1	1	1
3	60000	60001	3	75279194	75279195	I078	-	+	DUP	13	right of 3:60101 pointing left	left of 3:75279094 pointing right	Intersect	CCTCATGACCATAtcccaaagtacg	CCTGGCTAAAGAGATTGCTGATCCT	no product	failed		1	0	0	0	0	1
6	157559467	157559468	6	157641301	157641302	I079	+	+	INV	27	left of 6:157559367 pointing right	left of 6:157641201 pointing right	Intersect	AAAGATCAATCTCACCGGTCAAACC	CTAACAGGATGGGGTGATGAGACAT		worked		1	1	1	1	1	1
22	50087316	50087317	22	50211792	50211793	I080	-	+	DUP	14	right of 22:50087417 pointing left	left of 22:50211692 pointing right	Intersect	AAGGCCAGCAGACTCAATTAGAAGC	GCGTCAAAGACAACCAAAATTCAAG		worked		1	1	1	1	1	1
8	90190191	90190192	X	104469741	104469742	I081	-	-	TRA	23	right of 8:90190292 pointing left	right of X:104469842 pointing left	Intersect	atcccctacaATTGCTcaatgtcaa	CAACCCAACCCATAAAGTGAATCAA		worked		1	1	1	1	1	1
5	157863984	157863985	5	158706384	158706385	I082	+	-	DEL	20	left of 5:157863884 pointing right	right of 5:158706485 pointing left	Intersect	ggatgtcttgcacagcttttctgtt	cAGAAAACCCCACCTGTTTCTATGC		worked		1	1	1	1	1	1
8	78068750	78068751	8	88744597	88744598	I083	-	+	DUP	23	right of 8:78068851 pointing left	left of 8:88744497 pointing right	Intersect	gtgctgagataaacctcaaggcaaa	ACGTCATTCGTCAGttcattcaaca		worked		1	1	1	1	1	1
8	88903101	88903102	8	91013847	91013848	I084	+	-	DEL	19	left of 8:88903001 pointing right	right of 8:91013948 pointing left	Intersect	gcaacagccttcacacttaccatct	GCCGTATCCTTCCCTACCTCTTTCT		worked		1	1	1	1	1	1
3	187053384	187053385	3	192273116	192273117	I085	-	+	DUP	21	right of 3:187053485 pointing left	left of 3:192273016 pointing right	Intersect	CCCCTCTCTTAGGATAAGGCTGGAT	tgagggtctcagaagatgaggagaa		worked		1	1	1	1	1	1
X	148736071	148736072	X	148830519	148830520	I086	+	+	INV	10	left of X:148735971 pointing right	left of X:148830419 pointing right	Intersect	TTGATTTTGGTAGTTGAGGGCAGAA	gtgaattaacggattgtgtccaagg		worked	primer conflict	0	1	1	0	0	1
8	124819450	124819451	17	65286182	65286183	I087	-	-	TRA	20	right of 8:124819551 pointing left	right of 17:65286283 pointing left	Intersect	CAAAATTCAAAAAGGAGGACCCAAG	tgttatccaaccacccagagaacat		seq only from 1 side		1	1	1	1	1	1
14	99897165	99897166	14	99989500	99989501	I088	+	-	DEL	10	left of 14:99897065 pointing right	right of 14:99989601 pointing left	Intersect	GTTTCTGACACCAGCACCAAAGACT	GTGGGCTATTTAATGAGGGGAGTCA		worked		1	1	1	1	1	1
MT	775	776	MT	16557	16558	I089	-	+	DUP	12	right of MT:876 pointing left	left of MT:16457 pointing right	Intersect	AATGGTTTGGCTAAGGTTGTCTGG	CCACCATTAGCACCCAAAGCTAAG		worked, 2 seqs		1	1	1	1	1	1
8	131390649	131390650	14	57066836	57066837	I090	+	+	TRA	13	left of 8:131390549 pointing right	left of 14:57066736 pointing right	Intersect	gactgatacaGggagacagccatgt	TCCAACATAAGCCCATACAAAATGG	very light product?	failed		1	0	0	0	0	1
8	122968475	122968476	8	126645706	126645707	I091	+	-	DEL	19	left of 8:122968375 pointing right	right of 8:126645807 pointing left	Intersect	TGGAGAGCAATTGAAGGAGATATGG	CATGAGAGAGCACCTGAATGACAGA	no product	failed		1	0	0	0	0	1
8	79633233	79633234	8	131653900	131653901	I092	+	+	INV	16	left of 8:79633133 pointing right	left of 8:131653800 pointing right	Intersect	GCTTTTTAGCCACTAGAGGGTGCAT	TCTCTCAGTGCTGGGTTCTCTCCTA		worked		1	1	1	1	1	1
5	157701690	157701691	5	158241042	158241043	I093	-	+	DUP	16	right of 5:157701791 pointing left	left of 5:158240942 pointing right	Intersect	CATGCCAGGGTCAGTCACTAGAAGT	AAGAAATCCAGGGAGAAGAATGCAG		worked		1	1	1	1	1	1
22	46894505	46894506	22	47576370	47576371	I094	+	-	DEL	23	left of 22:46894405 pointing right	right of 22:47576471 pointing left	Intersect	tgttctgggcattcatatcttctgg	cacatttggggaggtgggtagtatt		worked		1	1	1	1	1	1
5	148135460	148135461	8	133436093	133436094	I095	-	-	TRA	16	right of 5:148135561 pointing left	right of 8:133436194 pointing left	Intersect	agggcaatatcctcaaagaacatga	acagtgtccttgtccttggtgagac		worked		1	1	1	1	1	1
6	32491475	32491476	6	32527494	32527495	I096	-	+	DUP	11	right of 6:32491576 pointing left	left of 6:32527394 pointing right	Intersect	TTGTTGGGAGTGGGAGACTGAAAGA	tttaaaagcctcatgggtggcatta	no product	failed	primer 1 multimatch	0	0	0	0	0	0
10	58834845	58834846	10	58854882	58854883	I097	+	+	INV	25	left of 10:58834745 pointing right	left of 10:58854782 pointing right	Intersect	ttagaggtgattgctgaggttttgg	AGACTCTCACCAAGCATGTGCTCTT	no product	failed		1	0	0	0	0	1
8	110040678	110040679	8	112707526	112707527	I098	+	-	DEL	86	left of 8:110040578 pointing right	right of 8:112707627 pointing left	Intersect	AGGAGAATTggcctggcaagtatta	TCCTTTTGCTTTGGACCTTTCAGAT		worked		1	1	1	1	1	1
7	114670635	114670636	MT	3218	3219	I099	-	-	TRA	80	right of 7:114670736 pointing left	right of MT:3319 pointing left	Intersect	CCAAGTTTGAATGCTTCCTCTTCTG	GGTTCGGTTGGTCTCTGCTAGTGT		worked, 2 seqs		1	1	1	1	1	1
20	16860872	16860873	20	48442405	48442406	I100	-	+	DUP	10	right of 20:16860973 pointing left	left of 20:48442305 pointing right	Intersect	CAAGTTGCCACATCCTATTCCACTC	ctgctgaatgagagtgtgatgccta		worked, 2 seqs		1	1	1	1	1	1
8	121550938	121550939	17	37277012	37277013	I219	-	-	TRA	333	right of 8:121551039 pointing left	right of 17:37277113 pointing left	Intersect	TGAGGGGCAGTGATTTTAGAGCATA	aaacctggagtcagtagaggccaag		worked		1
8	125549099	125549100	17	38067674	38067675	I231	-	+	TRA	204	right of 8:125549200 pointing left	left of 17:38067574 pointing right	Intersect	TATGGTTTCCTTTAGCCCCACTCTC	GGTAGGGAGGGGTAATTCAAAGGAC		worked		1
8	117989050	117989051	17	40572172	40572173	I437	-	+	TRA	60	right of 8:117989151 pointing left	left of 17:40572072 pointing right	Intersect	CGGGTACTAGCCATTTCCCAGCAA	GGGAGACAGGGAAGGAAATGCCAG	possible secondary bands	worked		1
8	79475426	79475427	17	38474391	38474392	I441	-	+	TRA	107	right of 8:79475527 pointing left	left of 17:38474291 pointing right	Intersect	aacacctttgtccactgctctgaaa	aaggtcacacagctCTCAGTTCCAG		worked		1
8	123907489	123907490	17	64043765	64043766	I111	+	+	TRA	34	left of 8:123907389 pointing right	left of 17:64043665 pointing right	Intersect	TCCAGATTTCAGCTGTAGCCTCTTG	agtgtggccttatttggttggaaat		worked		1
14	50256582	50256583	17	64042266	64042267	I448	+	-	TRA	40	left of 14:50256482 pointing right	right of 17:64042367 pointing left	Intersect	TTTACCCCCAGCAACTTCATGATAA	ccacactcataggtacgggagattg		worked		1
8	117049739	117049740	8	129096818	129096819	I125	-	+	DUP	441	right of 8:117049840 pointing left	left of 8:129096718 pointing right	Intersect	GAGGGGAGAAAGTTGATTAGGCAGA	GAACTGGTGTAACCTGGGTCTCTCA		worked		1
3	4363455	4363456	3	37183394	37183395	I174	-	+	DUP	44	right of 3:4363556 pointing left	left of 3:37183294 pointing right	Intersect						0
17	29210863	29210864	17	60648254	60648255	I214	+	-	DEL	42	left of 17:29210763 pointing right	right of 17:60648355 pointing left	Intersect	tctcagctcactgcaacctctacct	CCTCCTCATCCCTACTCACAGAACA	smear	failed		1
20	34461041	34461042	20	51186522	51186523	I237	+	-	DEL	21	left of 20:34460941 pointing right	right of 20:51186623 pointing left	Intersect	GGTCCAGCATATGATCTGTCCTGGT	AGGTTTCAGCCTAACATGCCCAGG		worked		1
8	81753872	81753873	8	124101978	124101979	I272	+	+	INV	23	left of 8:81753772 pointing right	left of 8:124101878 pointing right	Intersect	CCACATCACAAGTCTGAGCTAGCAA	aaatagcctggtatgctggtgtgtg		worked		1
20	34462210	34462211	20	47362266	47362267	I385	+	-	DEL	22	left of 20:34462110 pointing right	right of 20:47362367 pointing left	Intersect	ctcccccatgttgtagttgtcacat	gcaccagtgtaccatgaaaccaaat		worked		1
20	34216568	34216569	20	34460433	34460434	I348	+	-	DEL	20	left of 20:34216468 pointing right	right of 20:34460534 pointing left	Intersect	AGGGGAATGTTGATGTGTGTGTGA	ACCAGGACAGATCATATGCTGGACC		worked		1
8	117777222	117777223	8	121550914	121550915	I447	+	+	INV	39	left of 8:117777122 pointing right	left of 8:121550814 pointing right	Intersect	GAGCTTTTTCTGCATATCCCAGGAC	CAAGGGAAAGTCAACTCAGCAAGAA		worked		1
8	121542260	121542261	17	76745814	76745815	I362	-	-	TRA	65	right of 8:121542361 pointing left	right of 17:76745915 pointing left	Intersect	AACTGACACACAATCAGACCATCCA	attcaccccacctgagaaatagcat		worked		1
5	14441479	14441480	5	15603771	15603772	I364	+	-	DEL	19	left of 5:14441379 pointing right	right of 5:15603872 pointing left	Intersect	AGATGTACACAAAGCCCAAGTCAGG	TAACACATACAGGGCCTTGAAGCAT		worked, 2 seqs		1
8	119434616	119434617	8	121478670	121478671	I442	-	+	DUP	65	right of 8:119434717 pointing left	left of 8:121478570 pointing right	Intersect	CCAAACTGCTTCCTGCTTATTGAGA	CAGTTCAATGCAGCAAAAGGGATTA		worked		1
3	8043414	8043415	3	169055741	169055742	I336	+	-	DEL	53	left of 3:8043314 pointing right	right of 3:169055842 pointing left	Intersect	tcctcaaaggtctccacttgatgag	CACCCTCTGATTATATCGCAACCAA		worked		1
14	68974333	68974334	15	47698394	47698395	I371	+	-	TRA	11	left of 14:68974233 pointing right	right of 15:47698495 pointing left	Intersect	CATACCACAGGTGGGTACACATTCA	gttttggcatggacatacattgtga		worked, 2 seqs		1
