# Supplementary material for: Complex rearrangements and oncogene amplifications revealed by long-read DNA and RNA sequencing of a breast cancer cell line
Source: HighWire-hosted journal article supplement (doi:10.1101/gr.231100.117), 2018-06-28
Supplement: Supplemental_Table8_COSMIC_Details.xlsx [file Supplemental_Table8_COSMIC_Details.xlsx]

## Sheet: COSMIC gene hits
Supplemental Table 8. Details of COSMIC genes interrupted by structural variations.
var_type	var_ID	size	size_category	interval_type	gene_name	gene_type			Sequencing: PacBio
DEL	193	10	below_50bp	transcript	PRDM16	protein_coding			Alignment: NGMLR
DEL	193	10	below_50bp	gene	PRDM16	protein_coding			Variant-calling: Sniffles
DEL	193	10	below_50bp	transcript	PRDM16	protein_coding			Gene annotation: Gencode v19
DEL	193	10	below_50bp	gene	PRDM16	protein_coding			Intersected Sniffles variant calls with gene annotation using bedtools pairtobed
DEL	193	10	below_50bp	transcript	PRDM16	protein_coding			Filtered to include only genes that appear in the COSMIC Cancer Gene catalogue (downloaded July 26, 2017)
INS	195	37	below_50bp	transcript	PRDM16	protein_coding
INS	195	37	below_50bp	gene	PRDM16	protein_coding
INS	195	37	below_50bp	transcript	PRDM16	protein_coding
INS	195	37	below_50bp	gene	PRDM16	protein_coding
INS	195	37	below_50bp	transcript	PRDM16	protein_coding
DUP	197	478	structural_to_1kb	transcript	PRDM16	protein_coding
DUP	197	478	structural_to_1kb	gene	PRDM16	protein_coding
DUP	197	478	structural_to_1kb	transcript	PRDM16	protein_coding
DUP	197	478	structural_to_1kb	gene	PRDM16	protein_coding
DUP	197	478	structural_to_1kb	transcript	PRDM16	protein_coding
DEL	198	284	structural_to_1kb	transcript	PRDM16	protein_coding
DEL	198	284	structural_to_1kb	gene	PRDM16	protein_coding
DEL	198	284	structural_to_1kb	transcript	PRDM16	protein_coding
DEL	198	284	structural_to_1kb	gene	PRDM16	protein_coding
DEL	198	284	structural_to_1kb	transcript	PRDM16	protein_coding
INS	199	221	structural_to_1kb	transcript	PRDM16	protein_coding
INS	199	221	structural_to_1kb	gene	PRDM16	protein_coding
INS	199	221	structural_to_1kb	transcript	PRDM16	protein_coding
INS	199	221	structural_to_1kb	gene	PRDM16	protein_coding
INS	199	221	structural_to_1kb	transcript	PRDM16	protein_coding
DUP	201	1032	long-range	transcript	PRDM16	protein_coding
DUP	201	1032	long-range	gene	PRDM16	protein_coding
DUP	201	1032	long-range	transcript	PRDM16	protein_coding
DUP	201	1032	long-range	gene	PRDM16	protein_coding
DUP	201	1032	long-range	transcript	PRDM16	protein_coding
DEL	202	11	below_50bp	transcript	PRDM16	protein_coding
DEL	202	11	below_50bp	gene	PRDM16	protein_coding
DEL	202	11	below_50bp	transcript	PRDM16	protein_coding
DEL	202	11	below_50bp	gene	PRDM16	protein_coding
DEL	202	11	below_50bp	transcript	PRDM16	protein_coding
INS	203	39	below_50bp	transcript	PRDM16	protein_coding
INS	203	39	below_50bp	gene	PRDM16	protein_coding
INS	203	39	below_50bp	transcript	PRDM16	protein_coding
INS	203	39	below_50bp	gene	PRDM16	protein_coding
INS	203	39	below_50bp	transcript	PRDM16	protein_coding
INS	204	35	below_50bp	transcript	PRDM16	protein_coding
INS	204	35	below_50bp	gene	PRDM16	protein_coding
INS	204	35	below_50bp	transcript	PRDM16	protein_coding
INS	204	35	below_50bp	gene	PRDM16	protein_coding
INS	204	35	below_50bp	transcript	PRDM16	protein_coding
INS	205	31	below_50bp	transcript	PRDM16	protein_coding
INS	205	31	below_50bp	gene	PRDM16	protein_coding
INS	205	31	below_50bp	transcript	PRDM16	protein_coding
INS	205	31	below_50bp	gene	PRDM16	protein_coding
INS	205	31	below_50bp	transcript	PRDM16	protein_coding
INS	206	880	structural_to_1kb	transcript	PRDM16	protein_coding
INS	206	880	structural_to_1kb	gene	PRDM16	protein_coding
INS	206	880	structural_to_1kb	transcript	PRDM16	protein_coding
INS	206	880	structural_to_1kb	gene	PRDM16	protein_coding
INS	206	880	structural_to_1kb	transcript	PRDM16	protein_coding
DEL	207	14	below_50bp	transcript	PRDM16	protein_coding
DEL	207	14	below_50bp	gene	PRDM16	protein_coding
DEL	207	14	below_50bp	transcript	PRDM16	protein_coding
DEL	207	14	below_50bp	gene	PRDM16	protein_coding
DEL	207	14	below_50bp	transcript	PRDM16	protein_coding
INS	208	53	structural_to_1kb	transcript	PRDM16	protein_coding
INS	208	53	structural_to_1kb	gene	PRDM16	protein_coding
INS	208	53	structural_to_1kb	transcript	PRDM16	protein_coding
INS	208	53	structural_to_1kb	gene	PRDM16	protein_coding
INS	208	53	structural_to_1kb	transcript	PRDM16	protein_coding
INS	209	28	below_50bp	transcript	PRDM16	protein_coding
INS	209	28	below_50bp	gene	PRDM16	protein_coding
INS	209	28	below_50bp	transcript	PRDM16	protein_coding
INS	209	28	below_50bp	gene	PRDM16	protein_coding
INS	209	28	below_50bp	transcript	PRDM16	protein_coding
INS	210	23	below_50bp	transcript	PRDM16	protein_coding
INS	210	23	below_50bp	gene	PRDM16	protein_coding
INS	210	23	below_50bp	transcript	PRDM16	protein_coding
INS	210	23	below_50bp	gene	PRDM16	protein_coding
INS	210	23	below_50bp	transcript	PRDM16	protein_coding
INS	211	10	below_50bp	transcript	PRDM16	protein_coding
INS	211	10	below_50bp	gene	PRDM16	protein_coding
INS	211	10	below_50bp	transcript	PRDM16	protein_coding
INS	211	10	below_50bp	gene	PRDM16	protein_coding
INS	211	10	below_50bp	transcript	PRDM16	protein_coding
DEL	212	61	structural_to_1kb	transcript	PRDM16	protein_coding
DEL	212	61	structural_to_1kb	gene	PRDM16	protein_coding
DEL	212	61	structural_to_1kb	transcript	PRDM16	protein_coding
DEL	212	61	structural_to_1kb	gene	PRDM16	protein_coding
DEL	212	61	structural_to_1kb	transcript	PRDM16	protein_coding
DEL	213	759	structural_to_1kb	transcript	PRDM16	protein_coding
DEL	213	759	structural_to_1kb	gene	PRDM16	protein_coding
DEL	213	759	structural_to_1kb	transcript	PRDM16	protein_coding
DEL	213	759	structural_to_1kb	gene	PRDM16	protein_coding
DEL	213	759	structural_to_1kb	transcript	PRDM16	protein_coding
DEL	214	61	structural_to_1kb	transcript	PRDM16	protein_coding
DEL	214	61	structural_to_1kb	gene	PRDM16	protein_coding
DEL	214	61	structural_to_1kb	transcript	PRDM16	protein_coding
DEL	214	61	structural_to_1kb	gene	PRDM16	protein_coding
DEL	214	61	structural_to_1kb	transcript	PRDM16	protein_coding
DEL	215	59	structural_to_1kb	transcript	PRDM16	protein_coding
DEL	215	59	structural_to_1kb	gene	PRDM16	protein_coding
DEL	215	59	structural_to_1kb	transcript	PRDM16	protein_coding
DEL	215	59	structural_to_1kb	gene	PRDM16	protein_coding
DEL	215	59	structural_to_1kb	transcript	PRDM16	protein_coding
INS	216	563	structural_to_1kb	transcript	PRDM16	protein_coding
INS	216	563	structural_to_1kb	gene	PRDM16	protein_coding
INS	216	563	structural_to_1kb	transcript	PRDM16	protein_coding
INS	216	563	structural_to_1kb	gene	PRDM16	protein_coding
INS	216	563	structural_to_1kb	transcript	PRDM16	protein_coding
INS	217	149	structural_to_1kb	transcript	PRDM16	protein_coding
INS	217	149	structural_to_1kb	gene	PRDM16	protein_coding
INS	217	149	structural_to_1kb	transcript	PRDM16	protein_coding
INS	217	149	structural_to_1kb	gene	PRDM16	protein_coding
INS	217	149	structural_to_1kb	transcript	PRDM16	protein_coding
DEL	438	13	below_50bp	transcript	CAMTA1	protein_coding
DEL	438	13	below_50bp	gene	CAMTA1	protein_coding
DEL	438	13	below_50bp	transcript	CAMTA1	protein_coding
DEL	438	13	below_50bp	gene	CAMTA1	protein_coding
DEL	438	13	below_50bp	transcript	CAMTA1	protein_coding
INS	441	11	below_50bp	transcript	CAMTA1	protein_coding
INS	441	11	below_50bp	gene	CAMTA1	protein_coding
INS	441	11	below_50bp	transcript	CAMTA1	protein_coding
INS	441	11	below_50bp	gene	CAMTA1	protein_coding
INS	441	11	below_50bp	transcript	CAMTA1	protein_coding
INS	442	34	below_50bp	gene	CAMTA1	protein_coding
INS	442	34	below_50bp	transcript	CAMTA1	protein_coding
INS	442	34	below_50bp	gene	CAMTA1	protein_coding
INS	442	34	below_50bp	transcript	CAMTA1	protein_coding
INS	443	13	below_50bp	gene	CAMTA1	protein_coding
INS	443	13	below_50bp	transcript	CAMTA1	protein_coding
INS	443	13	below_50bp	gene	CAMTA1	protein_coding
INS	443	13	below_50bp	transcript	CAMTA1	protein_coding
INS	444	200	structural_to_1kb	gene	CAMTA1	protein_coding
INS	444	200	structural_to_1kb	transcript	CAMTA1	protein_coding
INS	444	200	structural_to_1kb	gene	CAMTA1	protein_coding
INS	444	200	structural_to_1kb	transcript	CAMTA1	protein_coding
DUP	445	49	below_50bp	gene	CAMTA1	protein_coding
DUP	445	49	below_50bp	transcript	CAMTA1	protein_coding
DUP	445	49	below_50bp	gene	CAMTA1	protein_coding
DUP	445	49	below_50bp	transcript	CAMTA1	protein_coding
INS	447	562	structural_to_1kb	gene	CAMTA1	protein_coding
INS	447	562	structural_to_1kb	transcript	CAMTA1	protein_coding
INS	447	562	structural_to_1kb	gene	CAMTA1	protein_coding
INS	447	562	structural_to_1kb	transcript	CAMTA1	protein_coding
INS	448	210	structural_to_1kb	gene	CAMTA1	protein_coding
INS	448	210	structural_to_1kb	transcript	CAMTA1	protein_coding
INS	448	210	structural_to_1kb	gene	CAMTA1	protein_coding
INS	448	210	structural_to_1kb	transcript	CAMTA1	protein_coding
DEL	449	11	below_50bp	gene	CAMTA1	protein_coding
DEL	449	11	below_50bp	transcript	CAMTA1	protein_coding
DEL	449	11	below_50bp	gene	CAMTA1	protein_coding
DEL	449	11	below_50bp	transcript	CAMTA1	protein_coding
DEL	450	12	below_50bp	gene	CAMTA1	protein_coding
DEL	450	12	below_50bp	transcript	CAMTA1	protein_coding
DEL	450	12	below_50bp	gene	CAMTA1	protein_coding
DEL	450	12	below_50bp	transcript	CAMTA1	protein_coding
DEL	451	19	below_50bp	gene	CAMTA1	protein_coding
DEL	451	19	below_50bp	transcript	CAMTA1	protein_coding
DEL	451	19	below_50bp	gene	CAMTA1	protein_coding
DEL	451	19	below_50bp	transcript	CAMTA1	protein_coding
DEL	452	151	structural_to_1kb	gene	CAMTA1	protein_coding
DEL	452	151	structural_to_1kb	transcript	CAMTA1	protein_coding
DEL	452	151	structural_to_1kb	gene	CAMTA1	protein_coding
DEL	452	151	structural_to_1kb	transcript	CAMTA1	protein_coding
DEL	453	98	structural_to_1kb	gene	CAMTA1	protein_coding
DEL	453	98	structural_to_1kb	transcript	CAMTA1	protein_coding
DEL	453	98	structural_to_1kb	gene	CAMTA1	protein_coding
DEL	453	98	structural_to_1kb	transcript	CAMTA1	protein_coding
INS	455	17	below_50bp	gene	CAMTA1	protein_coding
INS	455	17	below_50bp	transcript	CAMTA1	protein_coding
INS	455	17	below_50bp	gene	CAMTA1	protein_coding
INS	455	17	below_50bp	transcript	CAMTA1	protein_coding
INS	456	15	below_50bp	gene	CAMTA1	protein_coding
INS	456	15	below_50bp	transcript	CAMTA1	protein_coding
INS	456	15	below_50bp	gene	CAMTA1	protein_coding
INS	456	15	below_50bp	transcript	CAMTA1	protein_coding
DEL	457	21	below_50bp	gene	CAMTA1	protein_coding
DEL	457	21	below_50bp	transcript	CAMTA1	protein_coding
DEL	457	21	below_50bp	gene	CAMTA1	protein_coding
DEL	457	21	below_50bp	transcript	CAMTA1	protein_coding
DEL	458	20	below_50bp	gene	CAMTA1	protein_coding
DEL	458	20	below_50bp	transcript	CAMTA1	protein_coding
DEL	458	20	below_50bp	gene	CAMTA1	protein_coding
DEL	458	20	below_50bp	transcript	CAMTA1	protein_coding
INS	459	12	below_50bp	gene	CAMTA1	protein_coding
INS	459	12	below_50bp	transcript	CAMTA1	protein_coding
INS	459	12	below_50bp	gene	CAMTA1	protein_coding
INS	459	12	below_50bp	transcript	CAMTA1	protein_coding
DEL	460	89	structural_to_1kb	gene	CAMTA1	protein_coding
DEL	460	89	structural_to_1kb	transcript	CAMTA1	protein_coding
DEL	460	89	structural_to_1kb	gene	CAMTA1	protein_coding
DEL	460	89	structural_to_1kb	transcript	CAMTA1	protein_coding
INS	461	83	structural_to_1kb	gene	CAMTA1	protein_coding
INS	461	83	structural_to_1kb	transcript	CAMTA1	protein_coding
INS	461	83	structural_to_1kb	gene	CAMTA1	protein_coding
INS	461	83	structural_to_1kb	transcript	CAMTA1	protein_coding
INS	462	85	structural_to_1kb	gene	CAMTA1	protein_coding
INS	462	85	structural_to_1kb	transcript	CAMTA1	protein_coding
INS	462	85	structural_to_1kb	gene	CAMTA1	protein_coding
INS	462	85	structural_to_1kb	transcript	CAMTA1	protein_coding
DEL	463	12	below_50bp	gene	CAMTA1	protein_coding
DEL	463	12	below_50bp	transcript	CAMTA1	protein_coding
DEL	463	12	below_50bp	gene	CAMTA1	protein_coding
DEL	463	12	below_50bp	transcript	CAMTA1	protein_coding
INS	464	39	below_50bp	gene	CAMTA1	protein_coding
INS	464	39	below_50bp	transcript	CAMTA1	protein_coding
INS	464	39	below_50bp	gene	CAMTA1	protein_coding
INS	464	39	below_50bp	transcript	CAMTA1	protein_coding
INS	465	37	below_50bp	gene	CAMTA1	protein_coding
INS	465	37	below_50bp	transcript	CAMTA1	protein_coding
INS	465	37	below_50bp	gene	CAMTA1	protein_coding
INS	465	37	below_50bp	transcript	CAMTA1	protein_coding
INS	466	1605	long-range	gene	CAMTA1	protein_coding
INS	466	1605	long-range	transcript	CAMTA1	protein_coding
INS	466	1605	long-range	gene	CAMTA1	protein_coding
INS	466	1605	long-range	transcript	CAMTA1	protein_coding
DUP	467	64	structural_to_1kb	gene	CAMTA1	protein_coding
DUP	467	64	structural_to_1kb	transcript	CAMTA1	protein_coding
DUP	467	64	structural_to_1kb	gene	CAMTA1	protein_coding
DUP	467	64	structural_to_1kb	transcript	CAMTA1	protein_coding
DEL	468	61	structural_to_1kb	gene	CAMTA1	protein_coding
DEL	468	61	structural_to_1kb	transcript	CAMTA1	protein_coding
DEL	468	61	structural_to_1kb	gene	CAMTA1	protein_coding
DEL	468	61	structural_to_1kb	transcript	CAMTA1	protein_coding
DEL	469	227	structural_to_1kb	gene	CAMTA1	protein_coding
DEL	469	227	structural_to_1kb	transcript	CAMTA1	protein_coding
DEL	469	227	structural_to_1kb	gene	CAMTA1	protein_coding
DEL	469	227	structural_to_1kb	transcript	CAMTA1	protein_coding
DEL	470	210	structural_to_1kb	gene	CAMTA1	protein_coding
DEL	470	210	structural_to_1kb	transcript	CAMTA1	protein_coding
DEL	470	210	structural_to_1kb	gene	CAMTA1	protein_coding
DEL	470	210	structural_to_1kb	transcript	CAMTA1	protein_coding
DEL	471	32	below_50bp	gene	CAMTA1	protein_coding
DEL	471	32	below_50bp	transcript	CAMTA1	protein_coding
DEL	471	32	below_50bp	gene	CAMTA1	protein_coding
DEL	471	32	below_50bp	transcript	CAMTA1	protein_coding
DEL	472	11	below_50bp	transcript	CAMTA1	protein_coding
DEL	472	11	below_50bp	gene	CAMTA1	protein_coding
DEL	472	11	below_50bp	transcript	CAMTA1	protein_coding
DEL	472	11	below_50bp	gene	CAMTA1	protein_coding
DEL	472	11	below_50bp	transcript	CAMTA1	protein_coding
DEL	618	10	below_50bp	gene	MTOR	protein_coding
DEL	618	10	below_50bp	transcript	MTOR	protein_coding
DEL	618	10	below_50bp	gene	MTOR	protein_coding
DEL	618	10	below_50bp	transcript	MTOR	protein_coding
DEL	620	11	below_50bp	gene	MTOR	protein_coding
DEL	620	11	below_50bp	transcript	MTOR	protein_coding
DEL	620	11	below_50bp	gene	MTOR	protein_coding
DEL	620	11	below_50bp	transcript	MTOR	protein_coding
DEL	732	10	below_50bp	gene	SPEN	protein_coding
DEL	732	10	below_50bp	transcript	SPEN	protein_coding
DEL	732	10	below_50bp	gene	SPEN	protein_coding
DEL	732	10	below_50bp	transcript	SPEN	protein_coding
INS	860	16	below_50bp	gene	PAX7	protein_coding
INS	860	16	below_50bp	transcript	PAX7	protein_coding
INS	860	16	below_50bp	gene	PAX7	protein_coding
INS	860	16	below_50bp	transcript	PAX7	protein_coding
INS	861	73	structural_to_1kb	gene	PAX7	protein_coding
INS	861	73	structural_to_1kb	transcript	PAX7	protein_coding
INS	861	73	structural_to_1kb	gene	PAX7	protein_coding
INS	861	73	structural_to_1kb	transcript	PAX7	protein_coding
DEL	983	12	below_50bp	transcript	MDS2	protein_coding
DEL	983	12	below_50bp	gene	MDS2	protein_coding
DEL	983	12	below_50bp	transcript	MDS2	protein_coding
DEL	983	12	below_50bp	gene	MDS2	protein_coding
DEL	983	12	below_50bp	transcript	MDS2	protein_coding
INS	1059	15	below_50bp	gene	ARID1A	protein_coding
INS	1059	15	below_50bp	transcript	ARID1A	protein_coding
INS	1059	15	below_50bp	gene	ARID1A	protein_coding
INS	1059	15	below_50bp	transcript	ARID1A	protein_coding
DEL	1260	57	structural_to_1kb	gene	THRAP3	protein_coding
DEL	1260	57	structural_to_1kb	transcript	THRAP3	protein_coding
DEL	1260	57	structural_to_1kb	gene	THRAP3	protein_coding
DEL	1260	57	structural_to_1kb	transcript	THRAP3	protein_coding
DEL	1262	225	structural_to_1kb	gene	THRAP3	protein_coding
DEL	1262	225	structural_to_1kb	transcript	THRAP3	protein_coding
DEL	1262	225	structural_to_1kb	gene	THRAP3	protein_coding
DEL	1262	225	structural_to_1kb	transcript	THRAP3	protein_coding
DEL	1264	49	below_50bp	gene	THRAP3	protein_coding
DEL	1264	49	below_50bp	transcript	THRAP3	protein_coding
DEL	1264	49	below_50bp	gene	THRAP3	protein_coding
DEL	1264	49	below_50bp	transcript	THRAP3	protein_coding
INS	1265	30	below_50bp	transcript	THRAP3	protein_coding
INS	1265	30	below_50bp	gene	THRAP3	protein_coding
INS	1265	30	below_50bp	transcript	THRAP3	protein_coding
INS	1265	30	below_50bp	gene	THRAP3	protein_coding
INS	1265	30	below_50bp	transcript	THRAP3	protein_coding
INS	1266	11	below_50bp	transcript	THRAP3	protein_coding
INS	1266	11	below_50bp	gene	THRAP3	protein_coding
INS	1266	11	below_50bp	transcript	THRAP3	protein_coding
INS	1266	11	below_50bp	gene	THRAP3	protein_coding
INS	1266	11	below_50bp	transcript	THRAP3	protein_coding
INS	1267	12	below_50bp	transcript	THRAP3	protein_coding
INS	1267	12	below_50bp	gene	THRAP3	protein_coding
INS	1267	12	below_50bp	transcript	THRAP3	protein_coding
INS	1267	12	below_50bp	gene	THRAP3	protein_coding
INS	1267	12	below_50bp	transcript	THRAP3	protein_coding
INS	1564	345	structural_to_1kb	gene	MUTYH	protein_coding
INS	1564	345	structural_to_1kb	transcript	MUTYH	protein_coding
INS	1564	345	structural_to_1kb	exon	MUTYH	protein_coding
INS	1564	345	structural_to_1kb	UTR	MUTYH	protein_coding
INS	1564	345	structural_to_1kb	transcript	MUTYH	protein_coding
INS	1564	345	structural_to_1kb	gene	MUTYH	protein_coding
INS	1564	345	structural_to_1kb	transcript	MUTYH	protein_coding
INS	1564	345	structural_to_1kb	exon	MUTYH	protein_coding
INS	1564	345	structural_to_1kb	UTR	MUTYH	protein_coding
INS	1564	345	structural_to_1kb	transcript	MUTYH	protein_coding
INS	1641	12	below_50bp	gene	STIL	protein_coding
INS	1641	12	below_50bp	transcript	STIL	protein_coding
INS	1641	12	below_50bp	gene	STIL	protein_coding
INS	1641	12	below_50bp	transcript	STIL	protein_coding
DEL	1725	19	below_50bp	transcript	EPS15	protein_coding
DEL	1725	19	below_50bp	gene	EPS15	protein_coding
DEL	1725	19	below_50bp	transcript	EPS15	protein_coding
DEL	1725	19	below_50bp	gene	EPS15	protein_coding
DEL	1725	19	below_50bp	transcript	EPS15	protein_coding
DEL	2190	29	below_50bp	transcript	JAK1	protein_coding
DEL	2190	29	below_50bp	gene	JAK1	protein_coding
DEL	2190	29	below_50bp	transcript	JAK1	protein_coding
DEL	2190	29	below_50bp	gene	JAK1	protein_coding
DEL	2190	29	below_50bp	transcript	JAK1	protein_coding
INS	2191	11	below_50bp	gene	JAK1	protein_coding
INS	2191	11	below_50bp	transcript	JAK1	protein_coding
INS	2191	11	below_50bp	gene	JAK1	protein_coding
INS	2191	11	below_50bp	transcript	JAK1	protein_coding
INS	3732	42	below_50bp	gene	TRIM33	protein_coding
INS	3732	42	below_50bp	transcript	TRIM33	protein_coding
INS	3732	42	below_50bp	gene	TRIM33	protein_coding
INS	3732	42	below_50bp	transcript	TRIM33	protein_coding
DEL	3733	312	structural_to_1kb	gene	TRIM33	protein_coding
DEL	3733	312	structural_to_1kb	transcript	TRIM33	protein_coding
DEL	3733	312	structural_to_1kb	gene	TRIM33	protein_coding
DEL	3733	312	structural_to_1kb	transcript	TRIM33	protein_coding
DEL	3791	10	below_50bp	exon	ATP1A1	protein_coding
DEL	3791	10	below_50bp	transcript	ATP1A1	protein_coding
DEL	3791	10	below_50bp	gene	ATP1A1	protein_coding
DEL	3791	10	below_50bp	transcript	ATP1A1	protein_coding
DEL	3791	10	below_50bp	exon	ATP1A1	protein_coding
DEL	3791	10	below_50bp	transcript	ATP1A1	protein_coding
DEL	3791	10	below_50bp	gene	ATP1A1	protein_coding
DEL	3791	10	below_50bp	transcript	ATP1A1	protein_coding
INS	3881	15	below_50bp	gene	NOTCH2	protein_coding
INS	3881	15	below_50bp	transcript	NOTCH2	protein_coding
INS	3881	15	below_50bp	gene	NOTCH2	protein_coding
INS	3881	15	below_50bp	transcript	NOTCH2	protein_coding
INS	3883	21	below_50bp	gene	NOTCH2	protein_coding
INS	3883	21	below_50bp	transcript	NOTCH2	protein_coding
INS	3883	21	below_50bp	gene	NOTCH2	protein_coding
INS	3883	21	below_50bp	transcript	NOTCH2	protein_coding
INV	3885	24755116	long-range	gene	NOTCH2	protein_coding
INV	3885	24755116	long-range	transcript	NOTCH2	protein_coding
DEL	3888	59	structural_to_1kb	gene	NOTCH2	protein_coding
DEL	3888	59	structural_to_1kb	transcript	NOTCH2	protein_coding
DEL	3888	59	structural_to_1kb	gene	NOTCH2	protein_coding
DEL	3888	59	structural_to_1kb	transcript	NOTCH2	protein_coding
DEL	3890	21	below_50bp	gene	NOTCH2	protein_coding
DEL	3890	21	below_50bp	transcript	NOTCH2	protein_coding
DEL	3890	21	below_50bp	gene	NOTCH2	protein_coding
DEL	3890	21	below_50bp	transcript	NOTCH2	protein_coding
DEL	3892	3027	long-range	transcript	NOTCH2	protein_coding
DEL	3892	3027	long-range	gene	NOTCH2	protein_coding
DEL	3892	3027	long-range	transcript	NOTCH2	protein_coding
DEL	3892	3027	long-range	gene	NOTCH2	protein_coding
DEL	3892	3027	long-range	transcript	NOTCH2	protein_coding
INV	3894	24721532	long-range	transcript	NOTCH2	protein_coding
INV	3894	24721532	long-range	gene	NOTCH2	protein_coding
INV	3894	24721532	long-range	transcript	NOTCH2	protein_coding
INS	3902	12	below_50bp	gene	NOTCH2	protein_coding
INS	3902	12	below_50bp	transcript	NOTCH2	protein_coding
INS	3902	12	below_50bp	gene	NOTCH2	protein_coding
INS	3902	12	below_50bp	transcript	NOTCH2	protein_coding
INV	3904	24649172	long-range	gene	NOTCH2	protein_coding
INV	3904	24649172	long-range	transcript	NOTCH2	protein_coding
INS	3905	358	structural_to_1kb	gene	NOTCH2	protein_coding
INS	3905	358	structural_to_1kb	transcript	NOTCH2	protein_coding
INS	3905	358	structural_to_1kb	gene	NOTCH2	protein_coding
INS	3905	358	structural_to_1kb	transcript	NOTCH2	protein_coding
INS	3907	14	below_50bp	gene	NOTCH2	protein_coding
INS	3907	14	below_50bp	transcript	NOTCH2	protein_coding
INS	3907	14	below_50bp	gene	NOTCH2	protein_coding
INS	3907	14	below_50bp	transcript	NOTCH2	protein_coding
INS	3914	18	below_50bp	gene	NOTCH2	protein_coding
INS	3914	18	below_50bp	transcript	NOTCH2	protein_coding
INS	3914	18	below_50bp	gene	NOTCH2	protein_coding
INS	3914	18	below_50bp	transcript	NOTCH2	protein_coding
DEL	4008	275397	long-range	transcript	PDE4DIP	protein_coding
DEL	4008	275397	long-range	gene	PDE4DIP	protein_coding
DEL	4008	275397	long-range	transcript	PDE4DIP	protein_coding
INS	4009	217	structural_to_1kb	transcript	PDE4DIP	protein_coding
INS	4009	217	structural_to_1kb	gene	PDE4DIP	protein_coding
INS	4009	217	structural_to_1kb	transcript	PDE4DIP	protein_coding
INS	4009	217	structural_to_1kb	gene	PDE4DIP	protein_coding
INS	4009	217	structural_to_1kb	transcript	PDE4DIP	protein_coding
DEL	4010	100	structural_to_1kb	transcript	PDE4DIP	protein_coding
DEL	4010	100	structural_to_1kb	gene	PDE4DIP	protein_coding
DEL	4010	100	structural_to_1kb	transcript	PDE4DIP	protein_coding
DEL	4010	100	structural_to_1kb	gene	PDE4DIP	protein_coding
DEL	4010	100	structural_to_1kb	transcript	PDE4DIP	protein_coding
INS	4011	198	structural_to_1kb	transcript	PDE4DIP	protein_coding
INS	4011	198	structural_to_1kb	gene	PDE4DIP	protein_coding
INS	4011	198	structural_to_1kb	transcript	PDE4DIP	protein_coding
INS	4011	198	structural_to_1kb	gene	PDE4DIP	protein_coding
INS	4011	198	structural_to_1kb	transcript	PDE4DIP	protein_coding
DEL	4013	19	below_50bp	transcript	PDE4DIP	protein_coding
DEL	4013	19	below_50bp	gene	PDE4DIP	protein_coding
DEL	4013	19	below_50bp	transcript	PDE4DIP	protein_coding
DEL	4013	19	below_50bp	gene	PDE4DIP	protein_coding
DEL	4013	19	below_50bp	transcript	PDE4DIP	protein_coding
DEL	4014	978	structural_to_1kb	transcript	PDE4DIP	protein_coding
DEL	4014	978	structural_to_1kb	gene	PDE4DIP	protein_coding
DEL	4014	978	structural_to_1kb	transcript	PDE4DIP	protein_coding
DEL	4014	978	structural_to_1kb	exon	PDE4DIP	protein_coding
DEL	4014	978	structural_to_1kb	transcript	PDE4DIP	protein_coding
DEL	4014	978	structural_to_1kb	gene	PDE4DIP	protein_coding
DEL	4014	978	structural_to_1kb	transcript	PDE4DIP	protein_coding
DEL	4015	10509	long-range	transcript	PDE4DIP	protein_coding
DEL	4015	10509	long-range	gene	PDE4DIP	protein_coding
DEL	4015	10509	long-range	transcript	PDE4DIP	protein_coding
DEL	4015	10509	long-range	gene	PDE4DIP	protein_coding
DEL	4015	10509	long-range	transcript	PDE4DIP	protein_coding
DEL	4020	10	below_50bp	transcript	PDE4DIP	protein_coding
DEL	4020	10	below_50bp	gene	PDE4DIP	protein_coding
DEL	4020	10	below_50bp	transcript	PDE4DIP	protein_coding
DEL	4020	10	below_50bp	gene	PDE4DIP	protein_coding
DEL	4020	10	below_50bp	transcript	PDE4DIP	protein_coding
INS	4021	14	below_50bp	gene	PDE4DIP	protein_coding
INS	4021	14	below_50bp	transcript	PDE4DIP	protein_coding
INS	4021	14	below_50bp	gene	PDE4DIP	protein_coding
INS	4021	14	below_50bp	transcript	PDE4DIP	protein_coding
INS	4022	59	structural_to_1kb	gene	PDE4DIP	protein_coding
INS	4022	59	structural_to_1kb	transcript	PDE4DIP	protein_coding
INS	4022	59	structural_to_1kb	gene	PDE4DIP	protein_coding
INS	4022	59	structural_to_1kb	transcript	PDE4DIP	protein_coding
DEL	4023	748	structural_to_1kb	exon	PDE4DIP	protein_coding
DEL	4023	748	structural_to_1kb	transcript	PDE4DIP	protein_coding
DEL	4023	748	structural_to_1kb	gene	PDE4DIP	protein_coding
DEL	4023	748	structural_to_1kb	transcript	PDE4DIP	protein_coding
DEL	4023	748	structural_to_1kb	gene	PDE4DIP	protein_coding
DEL	4023	748	structural_to_1kb	transcript	PDE4DIP	protein_coding
DEL	4024	38	below_50bp	transcript	PDE4DIP	protein_coding
DEL	4024	38	below_50bp	gene	PDE4DIP	protein_coding
DEL	4024	38	below_50bp	transcript	PDE4DIP	protein_coding
DEL	4024	38	below_50bp	gene	PDE4DIP	protein_coding
DEL	4024	38	below_50bp	transcript	PDE4DIP	protein_coding
DEL	4028	21	below_50bp	transcript	PDE4DIP	protein_coding
DEL	4028	21	below_50bp	gene	PDE4DIP	protein_coding
DEL	4028	21	below_50bp	transcript	PDE4DIP	protein_coding
DEL	4028	21	below_50bp	gene	PDE4DIP	protein_coding
DEL	4028	21	below_50bp	transcript	PDE4DIP	protein_coding
INS	4029	39	below_50bp	transcript	PDE4DIP	protein_coding
INS	4029	39	below_50bp	gene	PDE4DIP	protein_coding
INS	4029	39	below_50bp	transcript	PDE4DIP	protein_coding
INS	4029	39	below_50bp	gene	PDE4DIP	protein_coding
INS	4029	39	below_50bp	transcript	PDE4DIP	protein_coding
DEL	4030	12	below_50bp	transcript	PDE4DIP	protein_coding
DEL	4030	12	below_50bp	gene	PDE4DIP	protein_coding
DEL	4030	12	below_50bp	transcript	PDE4DIP	protein_coding
DEL	4030	12	below_50bp	gene	PDE4DIP	protein_coding
DEL	4030	12	below_50bp	transcript	PDE4DIP	protein_coding
INS	4031	10	below_50bp	transcript	PDE4DIP	protein_coding
INS	4031	10	below_50bp	gene	PDE4DIP	protein_coding
INS	4031	10	below_50bp	transcript	PDE4DIP	protein_coding
INS	4031	10	below_50bp	gene	PDE4DIP	protein_coding
INS	4031	10	below_50bp	transcript	PDE4DIP	protein_coding
DEL	4032	323	structural_to_1kb	transcript	PDE4DIP	protein_coding
DEL	4032	323	structural_to_1kb	gene	PDE4DIP	protein_coding
DEL	4032	323	structural_to_1kb	transcript	PDE4DIP	protein_coding
DEL	4032	323	structural_to_1kb	gene	PDE4DIP	protein_coding
DEL	4032	323	structural_to_1kb	transcript	PDE4DIP	protein_coding
DEL	4033	323	structural_to_1kb	transcript	PDE4DIP	protein_coding
DEL	4033	323	structural_to_1kb	gene	PDE4DIP	protein_coding
DEL	4033	323	structural_to_1kb	transcript	PDE4DIP	protein_coding
DEL	4033	323	structural_to_1kb	gene	PDE4DIP	protein_coding
DEL	4033	323	structural_to_1kb	transcript	PDE4DIP	protein_coding
DEL	4034	10	below_50bp	transcript	PDE4DIP	protein_coding
DEL	4034	10	below_50bp	gene	PDE4DIP	protein_coding
DEL	4034	10	below_50bp	transcript	PDE4DIP	protein_coding
DEL	4034	10	below_50bp	gene	PDE4DIP	protein_coding
DEL	4034	10	below_50bp	transcript	PDE4DIP	protein_coding
INS	4035	12	below_50bp	transcript	PDE4DIP	protein_coding
INS	4035	12	below_50bp	gene	PDE4DIP	protein_coding
INS	4035	12	below_50bp	transcript	PDE4DIP	protein_coding
INS	4035	12	below_50bp	gene	PDE4DIP	protein_coding
INS	4035	12	below_50bp	transcript	PDE4DIP	protein_coding
INS	4036	13	below_50bp	transcript	PDE4DIP	protein_coding
INS	4036	13	below_50bp	gene	PDE4DIP	protein_coding
INS	4036	13	below_50bp	transcript	PDE4DIP	protein_coding
INS	4036	13	below_50bp	gene	PDE4DIP	protein_coding
INS	4036	13	below_50bp	transcript	PDE4DIP	protein_coding
INS	4037	22	below_50bp	transcript	PDE4DIP	protein_coding
INS	4037	22	below_50bp	gene	PDE4DIP	protein_coding
INS	4037	22	below_50bp	transcript	PDE4DIP	protein_coding
INS	4037	22	below_50bp	gene	PDE4DIP	protein_coding
INS	4037	22	below_50bp	transcript	PDE4DIP	protein_coding
INS	4038	15	below_50bp	transcript	PDE4DIP	protein_coding
INS	4038	15	below_50bp	gene	PDE4DIP	protein_coding
INS	4038	15	below_50bp	transcript	PDE4DIP	protein_coding
INS	4038	15	below_50bp	gene	PDE4DIP	protein_coding
INS	4038	15	below_50bp	transcript	PDE4DIP	protein_coding
INS	4040	14	below_50bp	transcript	PDE4DIP	protein_coding
INS	4040	14	below_50bp	gene	PDE4DIP	protein_coding
INS	4040	14	below_50bp	transcript	PDE4DIP	protein_coding
INS	4040	14	below_50bp	gene	PDE4DIP	protein_coding
INS	4040	14	below_50bp	transcript	PDE4DIP	protein_coding
INS	4041	10	below_50bp	transcript	PDE4DIP	protein_coding
INS	4041	10	below_50bp	gene	PDE4DIP	protein_coding
INS	4041	10	below_50bp	transcript	PDE4DIP	protein_coding
INS	4041	10	below_50bp	gene	PDE4DIP	protein_coding
INS	4041	10	below_50bp	transcript	PDE4DIP	protein_coding
INS	4043	10	below_50bp	transcript	PDE4DIP	protein_coding
INS	4043	10	below_50bp	gene	PDE4DIP	protein_coding
INS	4043	10	below_50bp	transcript	PDE4DIP	protein_coding
INS	4043	10	below_50bp	gene	PDE4DIP	protein_coding
INS	4043	10	below_50bp	transcript	PDE4DIP	protein_coding
INS	4044	27	below_50bp	transcript	PDE4DIP	protein_coding
INS	4044	27	below_50bp	gene	PDE4DIP	protein_coding
INS	4044	27	below_50bp	transcript	PDE4DIP	protein_coding
INS	4044	27	below_50bp	gene	PDE4DIP	protein_coding
INS	4044	27	below_50bp	transcript	PDE4DIP	protein_coding
DEL	4130	10	below_50bp	gene	BCL9	protein_coding
DEL	4130	10	below_50bp	transcript	BCL9	protein_coding
DEL	4130	10	below_50bp	gene	BCL9	protein_coding
DEL	4130	10	below_50bp	transcript	BCL9	protein_coding
INS	4131	10	below_50bp	gene	BCL9	protein_coding
INS	4131	10	below_50bp	transcript	BCL9	protein_coding
INS	4131	10	below_50bp	gene	BCL9	protein_coding
INS	4131	10	below_50bp	transcript	BCL9	protein_coding
DEL	4392	20	below_50bp	transcript	TPM3	protein_coding
DEL	4392	20	below_50bp	gene	TPM3	protein_coding
DEL	4392	20	below_50bp	transcript	TPM3	protein_coding
DEL	4392	20	below_50bp	gene	TPM3	protein_coding
DEL	4392	20	below_50bp	transcript	TPM3	protein_coding
DEL	4425	11	below_50bp	gene	MUC1	protein_coding
DEL	4425	11	below_50bp	transcript	MUC1	protein_coding
DEL	4425	11	below_50bp	gene	MUC1	protein_coding
DEL	4425	11	below_50bp	transcript	MUC1	protein_coding
INS	4426	1051	long-range	gene	MUC1	protein_coding
INS	4426	1051	long-range	transcript	MUC1	protein_coding
INS	4426	1051	long-range	gene	MUC1	protein_coding
INS	4426	1051	long-range	transcript	MUC1	protein_coding
INS	4426	1051	long-range	exon	MUC1	protein_coding
INS	4485	10	below_50bp	transcript	PRCC	protein_coding
INS	4485	10	below_50bp	gene	PRCC	protein_coding
INS	4485	10	below_50bp	transcript	PRCC	protein_coding
INS	4485	10	below_50bp	gene	PRCC	protein_coding
DEL	4487	27	below_50bp	transcript	PRCC	protein_coding
DEL	4487	27	below_50bp	gene	PRCC	protein_coding
DEL	4487	27	below_50bp	transcript	PRCC	protein_coding
DEL	4487	27	below_50bp	gene	PRCC	protein_coding
DEL	4487	27	below_50bp	transcript	PRCC	protein_coding
INS	4488	12	below_50bp	transcript	PRCC	protein_coding
INS	4488	12	below_50bp	gene	PRCC	protein_coding
INS	4488	12	below_50bp	transcript	PRCC	protein_coding
INS	4488	12	below_50bp	gene	PRCC	protein_coding
INS	4488	12	below_50bp	transcript	PRCC	protein_coding
INS	4489	14	below_50bp	gene	NTRK1	protein_coding
INS	4489	14	below_50bp	transcript	NTRK1	protein_coding
INS	4489	14	below_50bp	gene	NTRK1	protein_coding
INS	4489	14	below_50bp	transcript	NTRK1	protein_coding
DEL	4490	59	structural_to_1kb	gene	NTRK1	protein_coding
DEL	4490	59	structural_to_1kb	transcript	NTRK1	protein_coding
DEL	4490	59	structural_to_1kb	gene	NTRK1	protein_coding
DEL	4490	59	structural_to_1kb	transcript	NTRK1	protein_coding
DEL	4491	13	below_50bp	gene	NTRK1	protein_coding
DEL	4491	13	below_50bp	transcript	NTRK1	protein_coding
DEL	4491	13	below_50bp	gene	NTRK1	protein_coding
DEL	4491	13	below_50bp	transcript	NTRK1	protein_coding
INS	4636	14	below_50bp	gene	SDHC	protein_coding
INS	4636	14	below_50bp	transcript	SDHC	protein_coding
INS	4636	14	below_50bp	gene	SDHC	protein_coding
INS	4636	14	below_50bp	transcript	SDHC	protein_coding
INS	4645	16	below_50bp	gene	FCGR2B	protein_coding
INS	4645	16	below_50bp	transcript	FCGR2B	protein_coding
INS	4645	16	below_50bp	gene	FCGR2B	protein_coding
INS	4645	16	below_50bp	transcript	FCGR2B	protein_coding
DEL	4647	12	below_50bp	gene	FCGR2B	protein_coding
DEL	4647	12	below_50bp	transcript	FCGR2B	protein_coding
DEL	4647	12	below_50bp	gene	FCGR2B	protein_coding
DEL	4647	12	below_50bp	transcript	FCGR2B	protein_coding
DEL	4648	25	below_50bp	transcript	FCGR2B	protein_coding
DEL	4648	25	below_50bp	gene	FCGR2B	protein_coding
DEL	4648	25	below_50bp	transcript	FCGR2B	protein_coding
DEL	4648	25	below_50bp	gene	FCGR2B	protein_coding
DEL	4648	25	below_50bp	transcript	FCGR2B	protein_coding
DEL	4688	12	below_50bp	gene	DDR2	protein_coding
DEL	4688	12	below_50bp	transcript	DDR2	protein_coding
DEL	4688	12	below_50bp	gene	DDR2	protein_coding
DEL	4688	12	below_50bp	transcript	DDR2	protein_coding
INS	4689	12	below_50bp	gene	DDR2	protein_coding
INS	4689	12	below_50bp	transcript	DDR2	protein_coding
INS	4689	12	below_50bp	gene	DDR2	protein_coding
INS	4689	12	below_50bp	transcript	DDR2	protein_coding
INS	4690	19	below_50bp	gene	DDR2	protein_coding
INS	4690	19	below_50bp	transcript	DDR2	protein_coding
INS	4690	19	below_50bp	gene	DDR2	protein_coding
INS	4690	19	below_50bp	transcript	DDR2	protein_coding
INS	4691	14	below_50bp	gene	DDR2	protein_coding
INS	4691	14	below_50bp	transcript	DDR2	protein_coding
INS	4691	14	below_50bp	gene	DDR2	protein_coding
INS	4691	14	below_50bp	transcript	DDR2	protein_coding
INS	4692	265	structural_to_1kb	gene	DDR2	protein_coding
INS	4692	265	structural_to_1kb	transcript	DDR2	protein_coding
INS	4692	265	structural_to_1kb	gene	DDR2	protein_coding
INS	4692	265	structural_to_1kb	transcript	DDR2	protein_coding
INS	4693	282	structural_to_1kb	gene	DDR2	protein_coding
INS	4693	282	structural_to_1kb	transcript	DDR2	protein_coding
INS	4693	282	structural_to_1kb	gene	DDR2	protein_coding
INS	4693	282	structural_to_1kb	transcript	DDR2	protein_coding
INS	4694	10	below_50bp	gene	DDR2	protein_coding
INS	4694	10	below_50bp	transcript	DDR2	protein_coding
INS	4694	10	below_50bp	gene	DDR2	protein_coding
INS	4694	10	below_50bp	transcript	DDR2	protein_coding
DEL	4695	49	below_50bp	gene	DDR2	protein_coding
DEL	4695	49	below_50bp	transcript	DDR2	protein_coding
DEL	4695	49	below_50bp	gene	DDR2	protein_coding
DEL	4695	49	below_50bp	transcript	DDR2	protein_coding
INS	4696	14	below_50bp	transcript	DDR2	protein_coding
INS	4696	14	below_50bp	gene	DDR2	protein_coding
INS	4696	14	below_50bp	transcript	DDR2	protein_coding
INS	4696	14	below_50bp	gene	DDR2	protein_coding
INS	4696	14	below_50bp	transcript	DDR2	protein_coding
DEL	4767	17	below_50bp	gene	PBX1	protein_coding
DEL	4767	17	below_50bp	transcript	PBX1	protein_coding
DEL	4767	17	below_50bp	gene	PBX1	protein_coding
DEL	4767	17	below_50bp	transcript	PBX1	protein_coding
INS	4769	12	below_50bp	gene	PBX1	protein_coding
INS	4769	12	below_50bp	transcript	PBX1	protein_coding
INS	4769	12	below_50bp	gene	PBX1	protein_coding
INS	4769	12	below_50bp	transcript	PBX1	protein_coding
DEL	4771	10	below_50bp	gene	PBX1	protein_coding
DEL	4771	10	below_50bp	transcript	PBX1	protein_coding
DEL	4771	10	below_50bp	gene	PBX1	protein_coding
DEL	4771	10	below_50bp	transcript	PBX1	protein_coding
INS	4772	14	below_50bp	exon	PBX1	protein_coding
INS	4772	14	below_50bp	gene	PBX1	protein_coding
INS	4772	14	below_50bp	transcript	PBX1	protein_coding
INS	4772	14	below_50bp	exon	PBX1	protein_coding
INS	4772	14	below_50bp	gene	PBX1	protein_coding
INS	4772	14	below_50bp	transcript	PBX1	protein_coding
INS	4773	19	below_50bp	gene	PBX1	protein_coding
INS	4773	19	below_50bp	transcript	PBX1	protein_coding
INS	4773	19	below_50bp	gene	PBX1	protein_coding
INS	4773	19	below_50bp	transcript	PBX1	protein_coding
DEL	4774	12	below_50bp	gene	PBX1	protein_coding
DEL	4774	12	below_50bp	transcript	PBX1	protein_coding
DEL	4774	12	below_50bp	gene	PBX1	protein_coding
DEL	4774	12	below_50bp	transcript	PBX1	protein_coding
DEL	4775	10	below_50bp	gene	PBX1	protein_coding
DEL	4775	10	below_50bp	transcript	PBX1	protein_coding
DEL	4775	10	below_50bp	gene	PBX1	protein_coding
DEL	4775	10	below_50bp	transcript	PBX1	protein_coding
INS	4776	11	below_50bp	transcript	PBX1	protein_coding
INS	4776	11	below_50bp	gene	PBX1	protein_coding
INS	4776	11	below_50bp	transcript	PBX1	protein_coding
INS	4776	11	below_50bp	gene	PBX1	protein_coding
INS	4776	11	below_50bp	transcript	PBX1	protein_coding
INS	4778	11	below_50bp	transcript	PBX1	protein_coding
INS	4778	11	below_50bp	gene	PBX1	protein_coding
INS	4778	11	below_50bp	transcript	PBX1	protein_coding
INS	4778	11	below_50bp	gene	PBX1	protein_coding
INS	4778	11	below_50bp	transcript	PBX1	protein_coding
DEL	4779	44	below_50bp	transcript	PBX1	protein_coding
DEL	4779	44	below_50bp	gene	PBX1	protein_coding
DEL	4779	44	below_50bp	transcript	PBX1	protein_coding
DEL	4779	44	below_50bp	gene	PBX1	protein_coding
DEL	4779	44	below_50bp	transcript	PBX1	protein_coding
DEL	4780	40	below_50bp	transcript	PBX1	protein_coding
DEL	4780	40	below_50bp	gene	PBX1	protein_coding
DEL	4780	40	below_50bp	transcript	PBX1	protein_coding
DEL	4780	40	below_50bp	gene	PBX1	protein_coding
DEL	4780	40	below_50bp	transcript	PBX1	protein_coding
INS	4781	39	below_50bp	transcript	PBX1	protein_coding
INS	4781	39	below_50bp	gene	PBX1	protein_coding
INS	4781	39	below_50bp	transcript	PBX1	protein_coding
INS	4781	39	below_50bp	gene	PBX1	protein_coding
INS	4781	39	below_50bp	transcript	PBX1	protein_coding
INS	4986	99	structural_to_1kb	gene	PRRX1	protein_coding
INS	4986	99	structural_to_1kb	transcript	PRRX1	protein_coding
INS	4986	99	structural_to_1kb	gene	PRRX1	protein_coding
INS	4986	99	structural_to_1kb	transcript	PRRX1	protein_coding
DEL	5260	15	below_50bp	transcript	ABL2	protein_coding
DEL	5260	15	below_50bp	gene	ABL2	protein_coding
DEL	5260	15	below_50bp	transcript	ABL2	protein_coding
DEL	5260	15	below_50bp	gene	ABL2	protein_coding
DEL	5260	15	below_50bp	transcript	ABL2	protein_coding
DEL	5262	12	below_50bp	gene	ABL2	protein_coding
DEL	5262	12	below_50bp	transcript	ABL2	protein_coding
DEL	5262	12	below_50bp	gene	ABL2	protein_coding
DEL	5262	12	below_50bp	transcript	ABL2	protein_coding
INS	5263	10	below_50bp	gene	ABL2	protein_coding
INS	5263	10	below_50bp	transcript	ABL2	protein_coding
INS	5263	10	below_50bp	gene	ABL2	protein_coding
INS	5263	10	below_50bp	transcript	ABL2	protein_coding
INS	5264	15	below_50bp	gene	ABL2	protein_coding
INS	5264	15	below_50bp	transcript	ABL2	protein_coding
INS	5264	15	below_50bp	gene	ABL2	protein_coding
INS	5264	15	below_50bp	transcript	ABL2	protein_coding
INS	5265	14	below_50bp	gene	ABL2	protein_coding
INS	5265	14	below_50bp	transcript	ABL2	protein_coding
INS	5265	14	below_50bp	gene	ABL2	protein_coding
INS	5265	14	below_50bp	transcript	ABL2	protein_coding
DEL	5266	10	below_50bp	gene	ABL2	protein_coding
DEL	5266	10	below_50bp	transcript	ABL2	protein_coding
DEL	5266	10	below_50bp	gene	ABL2	protein_coding
DEL	5266	10	below_50bp	transcript	ABL2	protein_coding
DEL	5538	72	structural_to_1kb	gene	TPR	protein_coding
DEL	5538	72	structural_to_1kb	transcript	TPR	protein_coding
DEL	5538	72	structural_to_1kb	gene	TPR	protein_coding
DEL	5538	72	structural_to_1kb	transcript	TPR	protein_coding
INS	5539	68	structural_to_1kb	gene	TPR	protein_coding
INS	5539	68	structural_to_1kb	transcript	TPR	protein_coding
INS	5539	68	structural_to_1kb	gene	TPR	protein_coding
INS	5539	68	structural_to_1kb	transcript	TPR	protein_coding
INS	5785	13	below_50bp	transcript	CDC73	protein_coding
INS	5785	13	below_50bp	gene	CDC73	protein_coding
INS	5785	13	below_50bp	transcript	CDC73	protein_coding
INS	5785	13	below_50bp	gene	CDC73	protein_coding
INS	5785	13	below_50bp	transcript	CDC73	protein_coding
INS	5786	11	below_50bp	gene	CDC73	protein_coding
INS	5786	11	below_50bp	transcript	CDC73	protein_coding
INS	5786	11	below_50bp	gene	CDC73	protein_coding
INS	5786	11	below_50bp	transcript	CDC73	protein_coding
INS	5787	10	below_50bp	gene	CDC73	protein_coding
INS	5787	10	below_50bp	transcript	CDC73	protein_coding
INS	5787	10	below_50bp	gene	CDC73	protein_coding
INS	5787	10	below_50bp	transcript	CDC73	protein_coding
INS	5789	41	below_50bp	transcript	CDC73	protein_coding
INS	5789	41	below_50bp	gene	CDC73	protein_coding
INS	5789	41	below_50bp	transcript	CDC73	protein_coding
INS	5789	41	below_50bp	gene	CDC73	protein_coding
INS	5789	41	below_50bp	transcript	CDC73	protein_coding
INS	5997	10	below_50bp	transcript	PTPRC	protein_coding
INS	5997	10	below_50bp	gene	PTPRC	protein_coding
INS	5997	10	below_50bp	transcript	PTPRC	protein_coding
INS	5997	10	below_50bp	gene	PTPRC	protein_coding
INS	5997	10	below_50bp	transcript	PTPRC	protein_coding
DEL	5998	26	below_50bp	transcript	PTPRC	protein_coding
DEL	5998	26	below_50bp	gene	PTPRC	protein_coding
DEL	5998	26	below_50bp	transcript	PTPRC	protein_coding
DEL	5998	26	below_50bp	gene	PTPRC	protein_coding
DEL	5998	26	below_50bp	transcript	PTPRC	protein_coding
INS	6258	12	below_50bp	gene	MDM4	protein_coding
INS	6258	12	below_50bp	transcript	MDM4	protein_coding
INS	6258	12	below_50bp	gene	MDM4	protein_coding
INS	6258	12	below_50bp	transcript	MDM4	protein_coding
DEL	6295	10	below_50bp	gene	SLC45A3	protein_coding
DEL	6295	10	below_50bp	transcript	SLC45A3	protein_coding
DEL	6295	10	below_50bp	gene	SLC45A3	protein_coding
DEL	6295	10	below_50bp	transcript	SLC45A3	protein_coding
DEL	7693	12	below_50bp	gene	FH	protein_coding
DEL	7693	12	below_50bp	transcript	FH	protein_coding
DEL	7693	12	below_50bp	gene	FH	protein_coding
DEL	7693	12	below_50bp	transcript	FH	protein_coding
INS	9094	100	structural_to_1kb	gene	NCOA1	protein_coding
INS	9094	100	structural_to_1kb	transcript	NCOA1	protein_coding
INS	9094	100	structural_to_1kb	gene	NCOA1	protein_coding
INS	9094	100	structural_to_1kb	transcript	NCOA1	protein_coding
INS	9095	18	below_50bp	gene	NCOA1	protein_coding
INS	9095	18	below_50bp	transcript	NCOA1	protein_coding
INS	9095	18	below_50bp	gene	NCOA1	protein_coding
INS	9095	18	below_50bp	transcript	NCOA1	protein_coding
INS	9097	10	below_50bp	transcript	NCOA1	protein_coding
INS	9097	10	below_50bp	gene	NCOA1	protein_coding
INS	9097	10	below_50bp	transcript	NCOA1	protein_coding
INS	9097	10	below_50bp	gene	NCOA1	protein_coding
INS	9097	10	below_50bp	transcript	NCOA1	protein_coding
DEL	9120	23	below_50bp	gene	DNMT3A	protein_coding
DEL	9120	23	below_50bp	transcript	DNMT3A	protein_coding
DEL	9120	23	below_50bp	gene	DNMT3A	protein_coding
DEL	9120	23	below_50bp	transcript	DNMT3A	protein_coding
DEL	9244	11	below_50bp	gene	ALK	protein_coding
DEL	9244	11	below_50bp	transcript	ALK	protein_coding
DEL	9244	11	below_50bp	gene	ALK	protein_coding
DEL	9244	11	below_50bp	transcript	ALK	protein_coding
INS	9245	18	below_50bp	gene	ALK	protein_coding
INS	9245	18	below_50bp	transcript	ALK	protein_coding
INS	9245	18	below_50bp	gene	ALK	protein_coding
INS	9245	18	below_50bp	transcript	ALK	protein_coding
INS	9246	12	below_50bp	transcript	ALK	protein_coding
INS	9246	12	below_50bp	gene	ALK	protein_coding
INS	9246	12	below_50bp	transcript	ALK	protein_coding
INS	9246	12	below_50bp	gene	ALK	protein_coding
INS	9246	12	below_50bp	transcript	ALK	protein_coding
INS	9247	22	below_50bp	transcript	ALK	protein_coding
INS	9247	22	below_50bp	gene	ALK	protein_coding
INS	9247	22	below_50bp	transcript	ALK	protein_coding
INS	9247	22	below_50bp	gene	ALK	protein_coding
INS	9247	22	below_50bp	transcript	ALK	protein_coding
INS	9248	20	below_50bp	transcript	ALK	protein_coding
INS	9248	20	below_50bp	gene	ALK	protein_coding
INS	9248	20	below_50bp	transcript	ALK	protein_coding
INS	9248	20	below_50bp	gene	ALK	protein_coding
INS	9248	20	below_50bp	transcript	ALK	protein_coding
DEL	9249	18	below_50bp	gene	ALK	protein_coding
DEL	9249	18	below_50bp	transcript	ALK	protein_coding
DEL	9249	18	below_50bp	gene	ALK	protein_coding
DEL	9249	18	below_50bp	transcript	ALK	protein_coding
DEL	9250	12	below_50bp	gene	ALK	protein_coding
DEL	9250	12	below_50bp	transcript	ALK	protein_coding
DEL	9250	12	below_50bp	gene	ALK	protein_coding
DEL	9250	12	below_50bp	transcript	ALK	protein_coding
INS	9251	18	below_50bp	gene	ALK	protein_coding
INS	9251	18	below_50bp	transcript	ALK	protein_coding
INS	9251	18	below_50bp	gene	ALK	protein_coding
INS	9251	18	below_50bp	transcript	ALK	protein_coding
DEL	9252	12	below_50bp	gene	ALK	protein_coding
DEL	9252	12	below_50bp	transcript	ALK	protein_coding
DEL	9252	12	below_50bp	gene	ALK	protein_coding
DEL	9252	12	below_50bp	transcript	ALK	protein_coding
DEL	9254	14	below_50bp	gene	ALK	protein_coding
DEL	9254	14	below_50bp	transcript	ALK	protein_coding
DEL	9254	14	below_50bp	gene	ALK	protein_coding
DEL	9254	14	below_50bp	transcript	ALK	protein_coding
DEL	9255	13	below_50bp	gene	ALK	protein_coding
DEL	9255	13	below_50bp	transcript	ALK	protein_coding
DEL	9255	13	below_50bp	gene	ALK	protein_coding
DEL	9255	13	below_50bp	transcript	ALK	protein_coding
INS	9256	21	below_50bp	gene	ALK	protein_coding
INS	9256	21	below_50bp	transcript	ALK	protein_coding
INS	9256	21	below_50bp	gene	ALK	protein_coding
INS	9256	21	below_50bp	transcript	ALK	protein_coding
INS	9257	60	structural_to_1kb	gene	ALK	protein_coding
INS	9257	60	structural_to_1kb	transcript	ALK	protein_coding
INS	9257	60	structural_to_1kb	gene	ALK	protein_coding
INS	9257	60	structural_to_1kb	transcript	ALK	protein_coding
DEL	9258	24	below_50bp	gene	ALK	protein_coding
DEL	9258	24	below_50bp	transcript	ALK	protein_coding
DEL	9258	24	below_50bp	gene	ALK	protein_coding
DEL	9258	24	below_50bp	transcript	ALK	protein_coding
DEL	9259	75	structural_to_1kb	gene	ALK	protein_coding
DEL	9259	75	structural_to_1kb	transcript	ALK	protein_coding
DEL	9259	75	structural_to_1kb	gene	ALK	protein_coding
DEL	9259	75	structural_to_1kb	transcript	ALK	protein_coding
DEL	9260	20	below_50bp	gene	ALK	protein_coding
DEL	9260	20	below_50bp	transcript	ALK	protein_coding
DEL	9260	20	below_50bp	gene	ALK	protein_coding
DEL	9260	20	below_50bp	transcript	ALK	protein_coding
DEL	9261	54	structural_to_1kb	gene	ALK	protein_coding
DEL	9261	54	structural_to_1kb	transcript	ALK	protein_coding
DEL	9261	54	structural_to_1kb	gene	ALK	protein_coding
DEL	9261	54	structural_to_1kb	transcript	ALK	protein_coding
DEL	9262	10	below_50bp	gene	ALK	protein_coding
DEL	9262	10	below_50bp	transcript	ALK	protein_coding
DEL	9262	10	below_50bp	gene	ALK	protein_coding
DEL	9262	10	below_50bp	transcript	ALK	protein_coding
DEL	9263	13	below_50bp	gene	ALK	protein_coding
DEL	9263	13	below_50bp	transcript	ALK	protein_coding
DEL	9263	13	below_50bp	gene	ALK	protein_coding
DEL	9263	13	below_50bp	transcript	ALK	protein_coding
DEL	9539	17	below_50bp	exon	STRN	protein_coding
DEL	9539	17	below_50bp	UTR	STRN	protein_coding
DEL	9539	17	below_50bp	gene	STRN	protein_coding
DEL	9539	17	below_50bp	transcript	STRN	protein_coding
DEL	9539	17	below_50bp	exon	STRN	protein_coding
DEL	9539	17	below_50bp	UTR	STRN	protein_coding
DEL	9539	17	below_50bp	gene	STRN	protein_coding
DEL	9539	17	below_50bp	transcript	STRN	protein_coding
DEL	9540	10	below_50bp	transcript	STRN	protein_coding
DEL	9540	10	below_50bp	gene	STRN	protein_coding
DEL	9540	10	below_50bp	transcript	STRN	protein_coding
DEL	9540	10	below_50bp	gene	STRN	protein_coding
DEL	9540	10	below_50bp	transcript	STRN	protein_coding
DEL	9704	31	below_50bp	gene	EML4	protein_coding
DEL	9704	31	below_50bp	transcript	EML4	protein_coding
DEL	9704	31	below_50bp	gene	EML4	protein_coding
DEL	9704	31	below_50bp	transcript	EML4	protein_coding
INS	9705	19	below_50bp	gene	EML4	protein_coding
INS	9705	19	below_50bp	transcript	EML4	protein_coding
INS	9705	19	below_50bp	gene	EML4	protein_coding
INS	9705	19	below_50bp	transcript	EML4	protein_coding
INS	9706	14	below_50bp	transcript	EML4	protein_coding
INS	9706	14	below_50bp	gene	EML4	protein_coding
INS	9706	14	below_50bp	transcript	EML4	protein_coding
INS	9706	14	below_50bp	gene	EML4	protein_coding
INS	9706	14	below_50bp	transcript	EML4	protein_coding
DEL	9867	10	below_50bp	gene	MSH2	protein_coding
DEL	9867	10	below_50bp	transcript	MSH2	protein_coding
DEL	9867	10	below_50bp	gene	MSH2	protein_coding
DEL	9867	10	below_50bp	transcript	MSH2	protein_coding
DEL	9875	27	below_50bp	gene	MSH6	protein_coding
DEL	9875	27	below_50bp	transcript	MSH6	protein_coding
DEL	9875	27	below_50bp	gene	MSH6	protein_coding
DEL	9875	27	below_50bp	transcript	MSH6	protein_coding
INS	9876	1025	long-range	gene	MSH6	protein_coding
INS	9876	1025	long-range	transcript	MSH6	protein_coding
INS	9876	1025	long-range	gene	MSH6	protein_coding
INS	9876	1025	long-range	transcript	MSH6	protein_coding
DEL	9877	10	below_50bp	transcript	MSH6	protein_coding
DEL	9877	10	below_50bp	gene	MSH6	protein_coding
DEL	9877	10	below_50bp	transcript	MSH6	protein_coding
DEL	9877	10	below_50bp	gene	MSH6	protein_coding
DEL	9877	10	below_50bp	transcript	MSH6	protein_coding
DEL	10205	464	structural_to_1kb	transcript	BCL11A	protein_coding
DEL	10205	464	structural_to_1kb	gene	BCL11A	protein_coding
DEL	10205	464	structural_to_1kb	transcript	BCL11A	protein_coding
DEL	10205	464	structural_to_1kb	gene	BCL11A	protein_coding
DEL	10205	464	structural_to_1kb	transcript	BCL11A	protein_coding
INS	10228	22	below_50bp	transcript	XPO1	protein_coding
INS	10228	22	below_50bp	gene	XPO1	protein_coding
INS	10228	22	below_50bp	transcript	XPO1	protein_coding
INS	10228	22	below_50bp	gene	XPO1	protein_coding
INS	10228	22	below_50bp	transcript	XPO1	protein_coding
INS	10229	50	structural_to_1kb	transcript	XPO1	protein_coding
INS	10229	50	structural_to_1kb	gene	XPO1	protein_coding
INS	10229	50	structural_to_1kb	transcript	XPO1	protein_coding
INS	10229	50	structural_to_1kb	gene	XPO1	protein_coding
INS	10229	50	structural_to_1kb	transcript	XPO1	protein_coding
DEL	10230	11	below_50bp	gene	XPO1	protein_coding
DEL	10230	11	below_50bp	transcript	XPO1	protein_coding
DEL	10230	11	below_50bp	gene	XPO1	protein_coding
DEL	10230	11	below_50bp	transcript	XPO1	protein_coding
DEL	10231	13	below_50bp	transcript	XPO1	protein_coding
DEL	10231	13	below_50bp	gene	XPO1	protein_coding
DEL	10231	13	below_50bp	transcript	XPO1	protein_coding
DEL	10231	13	below_50bp	gene	XPO1	protein_coding
DEL	10231	13	below_50bp	transcript	XPO1	protein_coding
INS	10232	12	below_50bp	exon	XPO1	protein_coding
INS	10232	12	below_50bp	UTR	XPO1	protein_coding
INS	10232	12	below_50bp	exon	XPO1	protein_coding
INS	10232	12	below_50bp	UTR	XPO1	protein_coding
INS	10232	12	below_50bp	transcript	XPO1	protein_coding
INS	10232	12	below_50bp	gene	XPO1	protein_coding
INS	10232	12	below_50bp	transcript	XPO1	protein_coding
INS	10232	12	below_50bp	exon	XPO1	protein_coding
INS	10232	12	below_50bp	UTR	XPO1	protein_coding
INS	10232	12	below_50bp	exon	XPO1	protein_coding
INS	10232	12	below_50bp	UTR	XPO1	protein_coding
INS	10232	12	below_50bp	transcript	XPO1	protein_coding
INS	10232	12	below_50bp	gene	XPO1	protein_coding
INS	10232	12	below_50bp	transcript	XPO1	protein_coding
DEL	11174	39	below_50bp	gene	AFF3	protein_coding
DEL	11174	39	below_50bp	transcript	AFF3	protein_coding
DEL	11174	39	below_50bp	gene	AFF3	protein_coding
DEL	11174	39	below_50bp	transcript	AFF3	protein_coding
INS	11175	11	below_50bp	transcript	AFF3	protein_coding
INS	11175	11	below_50bp	gene	AFF3	protein_coding
INS	11175	11	below_50bp	transcript	AFF3	protein_coding
INS	11175	11	below_50bp	gene	AFF3	protein_coding
INS	11175	11	below_50bp	transcript	AFF3	protein_coding
DEL	11177	105	structural_to_1kb	gene	AFF3	protein_coding
DEL	11177	105	structural_to_1kb	transcript	AFF3	protein_coding
DEL	11177	105	structural_to_1kb	gene	AFF3	protein_coding
DEL	11177	105	structural_to_1kb	transcript	AFF3	protein_coding
DEL	11178	13	below_50bp	transcript	AFF3	protein_coding
DEL	11178	13	below_50bp	gene	AFF3	protein_coding
DEL	11178	13	below_50bp	transcript	AFF3	protein_coding
DEL	11178	13	below_50bp	gene	AFF3	protein_coding
DEL	11178	13	below_50bp	transcript	AFF3	protein_coding
INS	11179	26	below_50bp	transcript	AFF3	protein_coding
INS	11179	26	below_50bp	gene	AFF3	protein_coding
INS	11179	26	below_50bp	transcript	AFF3	protein_coding
INS	11179	26	below_50bp	gene	AFF3	protein_coding
INS	11179	26	below_50bp	transcript	AFF3	protein_coding
DEL	11496	21	below_50bp	transcript	TTL	protein_coding
DEL	11496	21	below_50bp	gene	TTL	protein_coding
DEL	11496	21	below_50bp	transcript	TTL	protein_coding
DEL	11496	21	below_50bp	gene	TTL	protein_coding
DEL	11496	21	below_50bp	transcript	TTL	protein_coding
INS	11497	22	below_50bp	exon	TTL	protein_coding
INS	11497	22	below_50bp	UTR	TTL	protein_coding
INS	11497	22	below_50bp	gene	TTL	protein_coding
INS	11497	22	below_50bp	transcript	TTL	protein_coding
INS	11497	22	below_50bp	exon	TTL	protein_coding
INS	11497	22	below_50bp	UTR	TTL	protein_coding
INS	11497	22	below_50bp	gene	TTL	protein_coding
INS	11497	22	below_50bp	transcript	TTL	protein_coding
DEL	12234	11	below_50bp	transcript	LRP1B	protein_coding
DEL	12234	11	below_50bp	gene	LRP1B	protein_coding
DEL	12234	11	below_50bp	transcript	LRP1B	protein_coding
DEL	12234	11	below_50bp	gene	LRP1B	protein_coding
DEL	12234	11	below_50bp	transcript	LRP1B	protein_coding
DEL	12236	17	below_50bp	transcript	LRP1B	protein_coding
DEL	12236	17	below_50bp	gene	LRP1B	protein_coding
DEL	12236	17	below_50bp	transcript	LRP1B	protein_coding
DEL	12236	17	below_50bp	gene	LRP1B	protein_coding
DEL	12236	17	below_50bp	transcript	LRP1B	protein_coding
INS	12237	13	below_50bp	transcript	LRP1B	protein_coding
INS	12237	13	below_50bp	gene	LRP1B	protein_coding
INS	12237	13	below_50bp	transcript	LRP1B	protein_coding
INS	12237	13	below_50bp	gene	LRP1B	protein_coding
INS	12237	13	below_50bp	transcript	LRP1B	protein_coding
INS	12239	27	below_50bp	gene	LRP1B	protein_coding
INS	12239	27	below_50bp	transcript	LRP1B	protein_coding
INS	12239	27	below_50bp	gene	LRP1B	protein_coding
INS	12239	27	below_50bp	transcript	LRP1B	protein_coding
DEL	12241	23	below_50bp	gene	LRP1B	protein_coding
DEL	12241	23	below_50bp	transcript	LRP1B	protein_coding
DEL	12241	23	below_50bp	gene	LRP1B	protein_coding
DEL	12241	23	below_50bp	transcript	LRP1B	protein_coding
INS	12242	43	below_50bp	gene	LRP1B	protein_coding
INS	12242	43	below_50bp	transcript	LRP1B	protein_coding
INS	12242	43	below_50bp	gene	LRP1B	protein_coding
INS	12242	43	below_50bp	transcript	LRP1B	protein_coding
INS	12244	44	below_50bp	gene	LRP1B	protein_coding
INS	12244	44	below_50bp	transcript	LRP1B	protein_coding
INS	12244	44	below_50bp	gene	LRP1B	protein_coding
INS	12244	44	below_50bp	transcript	LRP1B	protein_coding
INS	12245	16	below_50bp	gene	LRP1B	protein_coding
INS	12245	16	below_50bp	transcript	LRP1B	protein_coding
INS	12245	16	below_50bp	gene	LRP1B	protein_coding
INS	12245	16	below_50bp	transcript	LRP1B	protein_coding
INS	12246	21	below_50bp	gene	LRP1B	protein_coding
INS	12246	21	below_50bp	transcript	LRP1B	protein_coding
INS	12246	21	below_50bp	gene	LRP1B	protein_coding
INS	12246	21	below_50bp	transcript	LRP1B	protein_coding
DEL	12247	11	below_50bp	gene	LRP1B	protein_coding
DEL	12247	11	below_50bp	transcript	LRP1B	protein_coding
DEL	12247	11	below_50bp	gene	LRP1B	protein_coding
DEL	12247	11	below_50bp	transcript	LRP1B	protein_coding
INS	12248	18	below_50bp	gene	LRP1B	protein_coding
INS	12248	18	below_50bp	transcript	LRP1B	protein_coding
INS	12248	18	below_50bp	gene	LRP1B	protein_coding
INS	12248	18	below_50bp	transcript	LRP1B	protein_coding
DEL	12249	20	below_50bp	gene	LRP1B	protein_coding
DEL	12249	20	below_50bp	transcript	LRP1B	protein_coding
DEL	12249	20	below_50bp	gene	LRP1B	protein_coding
DEL	12249	20	below_50bp	transcript	LRP1B	protein_coding
INS	12250	14	below_50bp	gene	LRP1B	protein_coding
INS	12250	14	below_50bp	transcript	LRP1B	protein_coding
INS	12250	14	below_50bp	gene	LRP1B	protein_coding
INS	12250	14	below_50bp	transcript	LRP1B	protein_coding
DEL	12251	15	below_50bp	gene	LRP1B	protein_coding
DEL	12251	15	below_50bp	transcript	LRP1B	protein_coding
DEL	12251	15	below_50bp	gene	LRP1B	protein_coding
DEL	12251	15	below_50bp	transcript	LRP1B	protein_coding
INS	12253	22	below_50bp	gene	LRP1B	protein_coding
INS	12253	22	below_50bp	transcript	LRP1B	protein_coding
INS	12253	22	below_50bp	gene	LRP1B	protein_coding
INS	12253	22	below_50bp	transcript	LRP1B	protein_coding
DEL	12254	27	below_50bp	gene	LRP1B	protein_coding
DEL	12254	27	below_50bp	transcript	LRP1B	protein_coding
DEL	12254	27	below_50bp	gene	LRP1B	protein_coding
DEL	12254	27	below_50bp	transcript	LRP1B	protein_coding
DEL	12255	14	below_50bp	gene	LRP1B	protein_coding
DEL	12255	14	below_50bp	transcript	LRP1B	protein_coding
DEL	12255	14	below_50bp	gene	LRP1B	protein_coding
DEL	12255	14	below_50bp	transcript	LRP1B	protein_coding
INS	12256	16	below_50bp	gene	LRP1B	protein_coding
INS	12256	16	below_50bp	transcript	LRP1B	protein_coding
INS	12256	16	below_50bp	gene	LRP1B	protein_coding
INS	12256	16	below_50bp	transcript	LRP1B	protein_coding
DEL	12257	16	below_50bp	gene	LRP1B	protein_coding
DEL	12257	16	below_50bp	transcript	LRP1B	protein_coding
DEL	12257	16	below_50bp	gene	LRP1B	protein_coding
DEL	12257	16	below_50bp	transcript	LRP1B	protein_coding
INS	12258	11	below_50bp	gene	LRP1B	protein_coding
INS	12258	11	below_50bp	transcript	LRP1B	protein_coding
INS	12258	11	below_50bp	gene	LRP1B	protein_coding
INS	12258	11	below_50bp	transcript	LRP1B	protein_coding
DEL	12259	27	below_50bp	gene	LRP1B	protein_coding
DEL	12259	27	below_50bp	transcript	LRP1B	protein_coding
DEL	12259	27	below_50bp	gene	LRP1B	protein_coding
DEL	12259	27	below_50bp	transcript	LRP1B	protein_coding
INS	12260	10	below_50bp	gene	LRP1B	protein_coding
INS	12260	10	below_50bp	transcript	LRP1B	protein_coding
INS	12260	10	below_50bp	gene	LRP1B	protein_coding
INS	12260	10	below_50bp	transcript	LRP1B	protein_coding
INS	12261	24	below_50bp	gene	LRP1B	protein_coding
INS	12261	24	below_50bp	transcript	LRP1B	protein_coding
INS	12261	24	below_50bp	gene	LRP1B	protein_coding
INS	12261	24	below_50bp	transcript	LRP1B	protein_coding
INS	12262	33	below_50bp	gene	LRP1B	protein_coding
INS	12262	33	below_50bp	transcript	LRP1B	protein_coding
INS	12262	33	below_50bp	gene	LRP1B	protein_coding
INS	12262	33	below_50bp	transcript	LRP1B	protein_coding
DEL	12263	16	below_50bp	gene	LRP1B	protein_coding
DEL	12263	16	below_50bp	transcript	LRP1B	protein_coding
DEL	12263	16	below_50bp	gene	LRP1B	protein_coding
DEL	12263	16	below_50bp	transcript	LRP1B	protein_coding
DEL	12264	18	below_50bp	gene	LRP1B	protein_coding
DEL	12264	18	below_50bp	transcript	LRP1B	protein_coding
DEL	12264	18	below_50bp	gene	LRP1B	protein_coding
DEL	12264	18	below_50bp	transcript	LRP1B	protein_coding
DEL	12265	12	below_50bp	gene	LRP1B	protein_coding
DEL	12265	12	below_50bp	transcript	LRP1B	protein_coding
DEL	12265	12	below_50bp	gene	LRP1B	protein_coding
DEL	12265	12	below_50bp	transcript	LRP1B	protein_coding
INS	12266	29	below_50bp	gene	LRP1B	protein_coding
INS	12266	29	below_50bp	transcript	LRP1B	protein_coding
INS	12266	29	below_50bp	gene	LRP1B	protein_coding
INS	12266	29	below_50bp	transcript	LRP1B	protein_coding
INS	12267	19	below_50bp	gene	LRP1B	protein_coding
INS	12267	19	below_50bp	transcript	LRP1B	protein_coding
INS	12267	19	below_50bp	gene	LRP1B	protein_coding
INS	12267	19	below_50bp	transcript	LRP1B	protein_coding
DEL	12268	20	below_50bp	gene	LRP1B	protein_coding
DEL	12268	20	below_50bp	transcript	LRP1B	protein_coding
DEL	12268	20	below_50bp	gene	LRP1B	protein_coding
DEL	12268	20	below_50bp	transcript	LRP1B	protein_coding
DEL	12269	35	below_50bp	gene	LRP1B	protein_coding
DEL	12269	35	below_50bp	transcript	LRP1B	protein_coding
DEL	12269	35	below_50bp	gene	LRP1B	protein_coding
DEL	12269	35	below_50bp	transcript	LRP1B	protein_coding
DEL	12270	14	below_50bp	gene	LRP1B	protein_coding
DEL	12270	14	below_50bp	transcript	LRP1B	protein_coding
DEL	12270	14	below_50bp	gene	LRP1B	protein_coding
DEL	12270	14	below_50bp	transcript	LRP1B	protein_coding
INS	12271	14	below_50bp	gene	LRP1B	protein_coding
INS	12271	14	below_50bp	transcript	LRP1B	protein_coding
INS	12271	14	below_50bp	gene	LRP1B	protein_coding
INS	12271	14	below_50bp	transcript	LRP1B	protein_coding
INS	12272	21	below_50bp	gene	LRP1B	protein_coding
INS	12272	21	below_50bp	transcript	LRP1B	protein_coding
INS	12272	21	below_50bp	gene	LRP1B	protein_coding
INS	12272	21	below_50bp	transcript	LRP1B	protein_coding
INS	12273	23	below_50bp	gene	LRP1B	protein_coding
INS	12273	23	below_50bp	transcript	LRP1B	protein_coding
INS	12273	23	below_50bp	gene	LRP1B	protein_coding
INS	12273	23	below_50bp	transcript	LRP1B	protein_coding
DEL	12274	32	below_50bp	gene	LRP1B	protein_coding
DEL	12274	32	below_50bp	transcript	LRP1B	protein_coding
DEL	12274	32	below_50bp	gene	LRP1B	protein_coding
DEL	12274	32	below_50bp	transcript	LRP1B	protein_coding
INS	12275	15	below_50bp	gene	LRP1B	protein_coding
INS	12275	15	below_50bp	transcript	LRP1B	protein_coding
INS	12275	15	below_50bp	gene	LRP1B	protein_coding
INS	12275	15	below_50bp	transcript	LRP1B	protein_coding
DEL	12276	26	below_50bp	gene	LRP1B	protein_coding
DEL	12276	26	below_50bp	transcript	LRP1B	protein_coding
DEL	12276	26	below_50bp	gene	LRP1B	protein_coding
DEL	12276	26	below_50bp	transcript	LRP1B	protein_coding
INS	12277	12	below_50bp	gene	LRP1B	protein_coding
INS	12277	12	below_50bp	transcript	LRP1B	protein_coding
INS	12277	12	below_50bp	gene	LRP1B	protein_coding
INS	12277	12	below_50bp	transcript	LRP1B	protein_coding
DEL	12278	21	below_50bp	gene	LRP1B	protein_coding
DEL	12278	21	below_50bp	transcript	LRP1B	protein_coding
DEL	12278	21	below_50bp	gene	LRP1B	protein_coding
DEL	12278	21	below_50bp	transcript	LRP1B	protein_coding
INS	12279	10	below_50bp	gene	LRP1B	protein_coding
INS	12279	10	below_50bp	transcript	LRP1B	protein_coding
INS	12279	10	below_50bp	gene	LRP1B	protein_coding
INS	12279	10	below_50bp	transcript	LRP1B	protein_coding
DEL	12281	10	below_50bp	gene	LRP1B	protein_coding
DEL	12281	10	below_50bp	transcript	LRP1B	protein_coding
DEL	12281	10	below_50bp	gene	LRP1B	protein_coding
DEL	12281	10	below_50bp	transcript	LRP1B	protein_coding
INS	12282	61	structural_to_1kb	gene	LRP1B	protein_coding
INS	12282	61	structural_to_1kb	transcript	LRP1B	protein_coding
INS	12282	61	structural_to_1kb	gene	LRP1B	protein_coding
INS	12282	61	structural_to_1kb	transcript	LRP1B	protein_coding
DEL	12283	14	below_50bp	gene	LRP1B	protein_coding
DEL	12283	14	below_50bp	transcript	LRP1B	protein_coding
DEL	12283	14	below_50bp	gene	LRP1B	protein_coding
DEL	12283	14	below_50bp	transcript	LRP1B	protein_coding
INS	12284	28	below_50bp	gene	LRP1B	protein_coding
INS	12284	28	below_50bp	transcript	LRP1B	protein_coding
INS	12284	28	below_50bp	gene	LRP1B	protein_coding
INS	12284	28	below_50bp	transcript	LRP1B	protein_coding
DEL	12285	18	below_50bp	gene	LRP1B	protein_coding
DEL	12285	18	below_50bp	transcript	LRP1B	protein_coding
DEL	12285	18	below_50bp	gene	LRP1B	protein_coding
DEL	12285	18	below_50bp	transcript	LRP1B	protein_coding
INS	12286	20	below_50bp	gene	LRP1B	protein_coding
INS	12286	20	below_50bp	transcript	LRP1B	protein_coding
INS	12286	20	below_50bp	gene	LRP1B	protein_coding
INS	12286	20	below_50bp	transcript	LRP1B	protein_coding
DEL	12287	325	structural_to_1kb	gene	LRP1B	protein_coding
DEL	12287	325	structural_to_1kb	transcript	LRP1B	protein_coding
DEL	12287	325	structural_to_1kb	gene	LRP1B	protein_coding
DEL	12287	325	structural_to_1kb	transcript	LRP1B	protein_coding
DEL	12288	10	below_50bp	gene	LRP1B	protein_coding
DEL	12288	10	below_50bp	transcript	LRP1B	protein_coding
DEL	12288	10	below_50bp	gene	LRP1B	protein_coding
DEL	12288	10	below_50bp	transcript	LRP1B	protein_coding
INS	12290	12	below_50bp	gene	LRP1B	protein_coding
INS	12290	12	below_50bp	transcript	LRP1B	protein_coding
INS	12290	12	below_50bp	gene	LRP1B	protein_coding
INS	12290	12	below_50bp	transcript	LRP1B	protein_coding
INS	12291	10	below_50bp	gene	LRP1B	protein_coding
INS	12291	10	below_50bp	transcript	LRP1B	protein_coding
INS	12291	10	below_50bp	gene	LRP1B	protein_coding
INS	12291	10	below_50bp	transcript	LRP1B	protein_coding
INS	12293	10	below_50bp	gene	LRP1B	protein_coding
INS	12293	10	below_50bp	transcript	LRP1B	protein_coding
INS	12293	10	below_50bp	gene	LRP1B	protein_coding
INS	12293	10	below_50bp	transcript	LRP1B	protein_coding
INS	12294	10	below_50bp	gene	LRP1B	protein_coding
INS	12294	10	below_50bp	transcript	LRP1B	protein_coding
INS	12294	10	below_50bp	gene	LRP1B	protein_coding
INS	12294	10	below_50bp	transcript	LRP1B	protein_coding
DEL	12295	16	below_50bp	gene	LRP1B	protein_coding
DEL	12295	16	below_50bp	transcript	LRP1B	protein_coding
DEL	12295	16	below_50bp	gene	LRP1B	protein_coding
DEL	12295	16	below_50bp	transcript	LRP1B	protein_coding
INS	12296	14	below_50bp	gene	LRP1B	protein_coding
INS	12296	14	below_50bp	transcript	LRP1B	protein_coding
INS	12296	14	below_50bp	gene	LRP1B	protein_coding
INS	12296	14	below_50bp	transcript	LRP1B	protein_coding
INS	12297	13	below_50bp	gene	LRP1B	protein_coding
INS	12297	13	below_50bp	transcript	LRP1B	protein_coding
INS	12297	13	below_50bp	gene	LRP1B	protein_coding
INS	12297	13	below_50bp	transcript	LRP1B	protein_coding
INS	12298	22	below_50bp	gene	LRP1B	protein_coding
INS	12298	22	below_50bp	transcript	LRP1B	protein_coding
INS	12298	22	below_50bp	gene	LRP1B	protein_coding
INS	12298	22	below_50bp	transcript	LRP1B	protein_coding
INS	12299	14	below_50bp	gene	LRP1B	protein_coding
INS	12299	14	below_50bp	transcript	LRP1B	protein_coding
INS	12299	14	below_50bp	gene	LRP1B	protein_coding
INS	12299	14	below_50bp	transcript	LRP1B	protein_coding
DEL	12300	34	below_50bp	transcript	LRP1B	protein_coding
DEL	12300	34	below_50bp	gene	LRP1B	protein_coding
DEL	12300	34	below_50bp	transcript	LRP1B	protein_coding
DEL	12300	34	below_50bp	gene	LRP1B	protein_coding
DEL	12300	34	below_50bp	transcript	LRP1B	protein_coding
INS	12301	19	below_50bp	gene	LRP1B	protein_coding
INS	12301	19	below_50bp	transcript	LRP1B	protein_coding
INS	12301	19	below_50bp	gene	LRP1B	protein_coding
INS	12301	19	below_50bp	transcript	LRP1B	protein_coding
DEL	12302	23	below_50bp	gene	LRP1B	protein_coding
DEL	12302	23	below_50bp	transcript	LRP1B	protein_coding
DEL	12302	23	below_50bp	gene	LRP1B	protein_coding
DEL	12302	23	below_50bp	transcript	LRP1B	protein_coding
INS	12303	10	below_50bp	gene	LRP1B	protein_coding
INS	12303	10	below_50bp	transcript	LRP1B	protein_coding
INS	12303	10	below_50bp	gene	LRP1B	protein_coding
INS	12303	10	below_50bp	transcript	LRP1B	protein_coding
INS	12304	13	below_50bp	gene	LRP1B	protein_coding
INS	12304	13	below_50bp	transcript	LRP1B	protein_coding
INS	12304	13	below_50bp	gene	LRP1B	protein_coding
INS	12304	13	below_50bp	transcript	LRP1B	protein_coding
INS	12305	12	below_50bp	gene	LRP1B	protein_coding
INS	12305	12	below_50bp	transcript	LRP1B	protein_coding
INS	12305	12	below_50bp	gene	LRP1B	protein_coding
INS	12305	12	below_50bp	transcript	LRP1B	protein_coding
INS	12306	12	below_50bp	gene	LRP1B	protein_coding
INS	12306	12	below_50bp	transcript	LRP1B	protein_coding
INS	12306	12	below_50bp	gene	LRP1B	protein_coding
INS	12306	12	below_50bp	transcript	LRP1B	protein_coding
DEL	12307	10	below_50bp	gene	LRP1B	protein_coding
DEL	12307	10	below_50bp	transcript	LRP1B	protein_coding
DEL	12307	10	below_50bp	gene	LRP1B	protein_coding
DEL	12307	10	below_50bp	transcript	LRP1B	protein_coding
INS	12309	10	below_50bp	gene	LRP1B	protein_coding
INS	12309	10	below_50bp	transcript	LRP1B	protein_coding
INS	12309	10	below_50bp	gene	LRP1B	protein_coding
INS	12309	10	below_50bp	transcript	LRP1B	protein_coding
DEL	12310	12	below_50bp	gene	LRP1B	protein_coding
DEL	12310	12	below_50bp	transcript	LRP1B	protein_coding
DEL	12310	12	below_50bp	gene	LRP1B	protein_coding
DEL	12310	12	below_50bp	transcript	LRP1B	protein_coding
DEL	12311	96	structural_to_1kb	gene	LRP1B	protein_coding
DEL	12311	96	structural_to_1kb	transcript	LRP1B	protein_coding
DEL	12311	96	structural_to_1kb	gene	LRP1B	protein_coding
DEL	12311	96	structural_to_1kb	transcript	LRP1B	protein_coding
DEL	12312	20	below_50bp	gene	LRP1B	protein_coding
DEL	12312	20	below_50bp	transcript	LRP1B	protein_coding
DEL	12312	20	below_50bp	gene	LRP1B	protein_coding
DEL	12312	20	below_50bp	transcript	LRP1B	protein_coding
DEL	12445	10	below_50bp	exon	ACVR2A	protein_coding
DEL	12445	10	below_50bp	UTR	ACVR2A	protein_coding
DEL	12445	10	below_50bp	gene	ACVR2A	protein_coding
DEL	12445	10	below_50bp	transcript	ACVR2A	protein_coding
DEL	12445	10	below_50bp	exon	ACVR2A	protein_coding
DEL	12445	10	below_50bp	UTR	ACVR2A	protein_coding
DEL	12445	10	below_50bp	gene	ACVR2A	protein_coding
DEL	12445	10	below_50bp	transcript	ACVR2A	protein_coding
INS	12447	318	structural_to_1kb	gene	ACVR2A	protein_coding
INS	12447	318	structural_to_1kb	transcript	ACVR2A	protein_coding
INS	12447	318	structural_to_1kb	gene	ACVR2A	protein_coding
INS	12447	318	structural_to_1kb	transcript	ACVR2A	protein_coding
DEL	12702	29	below_50bp	transcript	ACVR1	protein_coding
DEL	12702	29	below_50bp	gene	ACVR1	protein_coding
DEL	12702	29	below_50bp	transcript	ACVR1	protein_coding
DEL	12702	29	below_50bp	gene	ACVR1	protein_coding
DEL	12702	29	below_50bp	transcript	ACVR1	protein_coding
DEL	12703	311	structural_to_1kb	gene	ACVR1	protein_coding
DEL	12703	311	structural_to_1kb	transcript	ACVR1	protein_coding
DEL	12703	311	structural_to_1kb	gene	ACVR1	protein_coding
DEL	12703	311	structural_to_1kb	transcript	ACVR1	protein_coding
INS	13189	11	below_50bp	transcript	NFE2L2	protein_coding
INS	13189	11	below_50bp	gene	NFE2L2	protein_coding
INS	13189	11	below_50bp	transcript	NFE2L2	protein_coding
INS	13189	11	below_50bp	gene	NFE2L2	protein_coding
INS	13190	33	below_50bp	gene	NFE2L2	protein_coding
INS	13190	33	below_50bp	transcript	NFE2L2	protein_coding
INS	13190	33	below_50bp	gene	NFE2L2	protein_coding
INS	13190	33	below_50bp	transcript	NFE2L2	protein_coding
DEL	13191	121	structural_to_1kb	gene	NFE2L2	protein_coding
DEL	13191	121	structural_to_1kb	transcript	NFE2L2	protein_coding
DEL	13191	121	structural_to_1kb	gene	NFE2L2	protein_coding
DEL	13191	121	structural_to_1kb	transcript	NFE2L2	protein_coding
INS	13192	15	below_50bp	gene	NFE2L2	protein_coding
INS	13192	15	below_50bp	transcript	NFE2L2	protein_coding
INS	13192	15	below_50bp	gene	NFE2L2	protein_coding
INS	13192	15	below_50bp	transcript	NFE2L2	protein_coding
INS	13474	90	structural_to_1kb	gene	PMS1	protein_coding
INS	13474	90	structural_to_1kb	transcript	PMS1	protein_coding
INS	13474	90	structural_to_1kb	gene	PMS1	protein_coding
INS	13474	90	structural_to_1kb	transcript	PMS1	protein_coding
DEL	13757	2792	long-range	transcript	CASP8	protein_coding
DEL	13757	2792	long-range	gene	CASP8	protein_coding
DEL	13757	2792	long-range	transcript	CASP8	protein_coding
DEL	13757	2792	long-range	gene	CASP8	protein_coding
DEL	13757	2792	long-range	transcript	CASP8	protein_coding
INS	13932	11	below_50bp	transcript	CREB1	protein_coding
INS	13932	11	below_50bp	gene	CREB1	protein_coding
INS	13932	11	below_50bp	transcript	CREB1	protein_coding
INS	13932	11	below_50bp	gene	CREB1	protein_coding
INS	13932	11	below_50bp	transcript	CREB1	protein_coding
INS	13933	21	below_50bp	transcript	CREB1	protein_coding
INS	13933	21	below_50bp	gene	CREB1	protein_coding
INS	13933	21	below_50bp	transcript	CREB1	protein_coding
INS	13933	21	below_50bp	gene	CREB1	protein_coding
INS	13933	21	below_50bp	transcript	CREB1	protein_coding
INS	13957	16	below_50bp	transcript	IDH1	protein_coding
INS	13957	16	below_50bp	gene	IDH1	protein_coding
INS	13957	16	below_50bp	transcript	IDH1	protein_coding
INS	13957	16	below_50bp	gene	IDH1	protein_coding
INS	13957	16	below_50bp	transcript	IDH1	protein_coding
INS	14033	11	below_50bp	exon	ERBB4	protein_coding
INS	14033	11	below_50bp	UTR	ERBB4	protein_coding
INS	14033	11	below_50bp	exon	ERBB4	protein_coding
INS	14033	11	below_50bp	UTR	ERBB4	protein_coding
INS	14033	11	below_50bp	gene	ERBB4	protein_coding
INS	14033	11	below_50bp	transcript	ERBB4	protein_coding
INS	14033	11	below_50bp	exon	ERBB4	protein_coding
INS	14033	11	below_50bp	UTR	ERBB4	protein_coding
INS	14033	11	below_50bp	exon	ERBB4	protein_coding
INS	14033	11	below_50bp	UTR	ERBB4	protein_coding
INS	14033	11	below_50bp	gene	ERBB4	protein_coding
INS	14033	11	below_50bp	transcript	ERBB4	protein_coding
DEL	14036	26	below_50bp	gene	ERBB4	protein_coding
DEL	14036	26	below_50bp	transcript	ERBB4	protein_coding
DEL	14036	26	below_50bp	gene	ERBB4	protein_coding
DEL	14036	26	below_50bp	transcript	ERBB4	protein_coding
INS	14037	19	below_50bp	gene	ERBB4	protein_coding
INS	14037	19	below_50bp	transcript	ERBB4	protein_coding
INS	14037	19	below_50bp	gene	ERBB4	protein_coding
INS	14037	19	below_50bp	transcript	ERBB4	protein_coding
INS	14038	27	below_50bp	gene	ERBB4	protein_coding
INS	14038	27	below_50bp	transcript	ERBB4	protein_coding
INS	14038	27	below_50bp	gene	ERBB4	protein_coding
INS	14038	27	below_50bp	transcript	ERBB4	protein_coding
INS	14039	27	below_50bp	gene	ERBB4	protein_coding
INS	14039	27	below_50bp	transcript	ERBB4	protein_coding
INS	14039	27	below_50bp	gene	ERBB4	protein_coding
INS	14039	27	below_50bp	transcript	ERBB4	protein_coding
INS	14040	13	below_50bp	gene	ERBB4	protein_coding
INS	14040	13	below_50bp	transcript	ERBB4	protein_coding
INS	14040	13	below_50bp	gene	ERBB4	protein_coding
INS	14040	13	below_50bp	transcript	ERBB4	protein_coding
INS	14041	25	below_50bp	gene	ERBB4	protein_coding
INS	14041	25	below_50bp	transcript	ERBB4	protein_coding
INS	14041	25	below_50bp	gene	ERBB4	protein_coding
INS	14041	25	below_50bp	transcript	ERBB4	protein_coding
DEL	14042	42	below_50bp	gene	ERBB4	protein_coding
DEL	14042	42	below_50bp	transcript	ERBB4	protein_coding
DEL	14042	42	below_50bp	gene	ERBB4	protein_coding
DEL	14042	42	below_50bp	transcript	ERBB4	protein_coding
DEL	14043	10	below_50bp	transcript	ERBB4	protein_coding
DEL	14043	10	below_50bp	gene	ERBB4	protein_coding
DEL	14043	10	below_50bp	transcript	ERBB4	protein_coding
DEL	14043	10	below_50bp	gene	ERBB4	protein_coding
DEL	14043	10	below_50bp	transcript	ERBB4	protein_coding
INS	14044	24	below_50bp	gene	ERBB4	protein_coding
INS	14044	24	below_50bp	transcript	ERBB4	protein_coding
INS	14044	24	below_50bp	gene	ERBB4	protein_coding
INS	14044	24	below_50bp	transcript	ERBB4	protein_coding
INS	14045	35	below_50bp	gene	ERBB4	protein_coding
INS	14045	35	below_50bp	transcript	ERBB4	protein_coding
INS	14045	35	below_50bp	gene	ERBB4	protein_coding
INS	14045	35	below_50bp	transcript	ERBB4	protein_coding
DEL	14046	297	structural_to_1kb	gene	ERBB4	protein_coding
DEL	14046	297	structural_to_1kb	transcript	ERBB4	protein_coding
DEL	14046	297	structural_to_1kb	gene	ERBB4	protein_coding
DEL	14046	297	structural_to_1kb	transcript	ERBB4	protein_coding
INS	14047	15	below_50bp	transcript	ERBB4	protein_coding
INS	14047	15	below_50bp	gene	ERBB4	protein_coding
INS	14047	15	below_50bp	transcript	ERBB4	protein_coding
INS	14047	15	below_50bp	gene	ERBB4	protein_coding
INS	14047	15	below_50bp	transcript	ERBB4	protein_coding
DEL	14048	14	below_50bp	transcript	ERBB4	protein_coding
DEL	14048	14	below_50bp	gene	ERBB4	protein_coding
DEL	14048	14	below_50bp	transcript	ERBB4	protein_coding
DEL	14048	14	below_50bp	gene	ERBB4	protein_coding
DEL	14048	14	below_50bp	transcript	ERBB4	protein_coding
DEL	14049	73	structural_to_1kb	transcript	ERBB4	protein_coding
DEL	14049	73	structural_to_1kb	gene	ERBB4	protein_coding
DEL	14049	73	structural_to_1kb	transcript	ERBB4	protein_coding
DEL	14049	73	structural_to_1kb	gene	ERBB4	protein_coding
DEL	14049	73	structural_to_1kb	transcript	ERBB4	protein_coding
DEL	14050	17	below_50bp	transcript	ERBB4	protein_coding
DEL	14050	17	below_50bp	gene	ERBB4	protein_coding
DEL	14050	17	below_50bp	transcript	ERBB4	protein_coding
DEL	14050	17	below_50bp	gene	ERBB4	protein_coding
DEL	14050	17	below_50bp	transcript	ERBB4	protein_coding
INS	14052	1670	long-range	transcript	ERBB4	protein_coding
INS	14052	1670	long-range	gene	ERBB4	protein_coding
INS	14052	1670	long-range	transcript	ERBB4	protein_coding
INS	14052	1670	long-range	gene	ERBB4	protein_coding
INS	14052	1670	long-range	transcript	ERBB4	protein_coding
INS	14053	328	structural_to_1kb	transcript	ERBB4	protein_coding
INS	14053	328	structural_to_1kb	gene	ERBB4	protein_coding
INS	14053	328	structural_to_1kb	transcript	ERBB4	protein_coding
INS	14053	328	structural_to_1kb	gene	ERBB4	protein_coding
INS	14053	328	structural_to_1kb	transcript	ERBB4	protein_coding
DEL	14054	149	structural_to_1kb	transcript	ERBB4	protein_coding
DEL	14054	149	structural_to_1kb	gene	ERBB4	protein_coding
DEL	14054	149	structural_to_1kb	transcript	ERBB4	protein_coding
DEL	14054	149	structural_to_1kb	gene	ERBB4	protein_coding
DEL	14054	149	structural_to_1kb	transcript	ERBB4	protein_coding
INS	14056	12	below_50bp	transcript	ERBB4	protein_coding
INS	14056	12	below_50bp	gene	ERBB4	protein_coding
INS	14056	12	below_50bp	transcript	ERBB4	protein_coding
INS	14056	12	below_50bp	gene	ERBB4	protein_coding
INS	14056	12	below_50bp	transcript	ERBB4	protein_coding
INS	14058	339	structural_to_1kb	gene	ERBB4	protein_coding
INS	14058	339	structural_to_1kb	transcript	ERBB4	protein_coding
INS	14058	339	structural_to_1kb	gene	ERBB4	protein_coding
INS	14058	339	structural_to_1kb	transcript	ERBB4	protein_coding
DEL	14059	24	below_50bp	gene	ERBB4	protein_coding
DEL	14059	24	below_50bp	transcript	ERBB4	protein_coding
DEL	14059	24	below_50bp	gene	ERBB4	protein_coding
DEL	14059	24	below_50bp	transcript	ERBB4	protein_coding
INS	14061	17	below_50bp	gene	ERBB4	protein_coding
INS	14061	17	below_50bp	transcript	ERBB4	protein_coding
INS	14061	17	below_50bp	gene	ERBB4	protein_coding
INS	14061	17	below_50bp	transcript	ERBB4	protein_coding
INS	14062	28	below_50bp	gene	ERBB4	protein_coding
INS	14062	28	below_50bp	transcript	ERBB4	protein_coding
INS	14062	28	below_50bp	gene	ERBB4	protein_coding
INS	14062	28	below_50bp	transcript	ERBB4	protein_coding
INS	14063	12	below_50bp	gene	ERBB4	protein_coding
INS	14063	12	below_50bp	transcript	ERBB4	protein_coding
INS	14063	12	below_50bp	gene	ERBB4	protein_coding
INS	14063	12	below_50bp	transcript	ERBB4	protein_coding
INS	14065	10	below_50bp	gene	ERBB4	protein_coding
INS	14065	10	below_50bp	transcript	ERBB4	protein_coding
INS	14065	10	below_50bp	gene	ERBB4	protein_coding
INS	14065	10	below_50bp	transcript	ERBB4	protein_coding
DEL	14066	15	below_50bp	gene	ERBB4	protein_coding
DEL	14066	15	below_50bp	transcript	ERBB4	protein_coding
DEL	14066	15	below_50bp	gene	ERBB4	protein_coding
DEL	14066	15	below_50bp	transcript	ERBB4	protein_coding
INS	14067	11	below_50bp	gene	ERBB4	protein_coding
INS	14067	11	below_50bp	transcript	ERBB4	protein_coding
INS	14067	11	below_50bp	gene	ERBB4	protein_coding
INS	14067	11	below_50bp	transcript	ERBB4	protein_coding
DEL	14069	8048	long-range	gene	ERBB4	protein_coding
DEL	14069	8048	long-range	transcript	ERBB4	protein_coding
DEL	14069	8048	long-range	gene	ERBB4	protein_coding
DEL	14069	8048	long-range	transcript	ERBB4	protein_coding
INS	14070	17	below_50bp	gene	ERBB4	protein_coding
INS	14070	17	below_50bp	transcript	ERBB4	protein_coding
INS	14070	17	below_50bp	gene	ERBB4	protein_coding
INS	14070	17	below_50bp	transcript	ERBB4	protein_coding
INS	14071	10	below_50bp	gene	ERBB4	protein_coding
INS	14071	10	below_50bp	transcript	ERBB4	protein_coding
INS	14071	10	below_50bp	gene	ERBB4	protein_coding
INS	14071	10	below_50bp	transcript	ERBB4	protein_coding
DEL	14072	23	below_50bp	gene	ERBB4	protein_coding
DEL	14072	23	below_50bp	transcript	ERBB4	protein_coding
DEL	14072	23	below_50bp	gene	ERBB4	protein_coding
DEL	14072	23	below_50bp	transcript	ERBB4	protein_coding
DEL	14073	48	below_50bp	gene	ERBB4	protein_coding
DEL	14073	48	below_50bp	transcript	ERBB4	protein_coding
DEL	14073	48	below_50bp	gene	ERBB4	protein_coding
DEL	14073	48	below_50bp	transcript	ERBB4	protein_coding
DEL	14170	13	below_50bp	gene	ATIC	protein_coding
DEL	14170	13	below_50bp	transcript	ATIC	protein_coding
DEL	14170	13	below_50bp	gene	ATIC	protein_coding
DEL	14170	13	below_50bp	transcript	ATIC	protein_coding
DEL	14369	13	below_50bp	gene	PAX3	protein_coding
DEL	14369	13	below_50bp	transcript	PAX3	protein_coding
DEL	14369	13	below_50bp	gene	PAX3	protein_coding
DEL	14369	13	below_50bp	transcript	PAX3	protein_coding
DEL	14370	11	below_50bp	gene	PAX3	protein_coding
DEL	14370	11	below_50bp	transcript	PAX3	protein_coding
DEL	14370	11	below_50bp	gene	PAX3	protein_coding
DEL	14370	11	below_50bp	transcript	PAX3	protein_coding
DEL	14372	16	below_50bp	gene	PAX3	protein_coding
DEL	14372	16	below_50bp	transcript	PAX3	protein_coding
DEL	14372	16	below_50bp	gene	PAX3	protein_coding
DEL	14372	16	below_50bp	transcript	PAX3	protein_coding
DEL	14388	13	below_50bp	gene	ACSL3	protein_coding
DEL	14388	13	below_50bp	transcript	ACSL3	protein_coding
DEL	14388	13	below_50bp	gene	ACSL3	protein_coding
DEL	14388	13	below_50bp	transcript	ACSL3	protein_coding
DEL	14389	2491	long-range	gene	ACSL3	protein_coding
DEL	14389	2491	long-range	transcript	ACSL3	protein_coding
DEL	14389	2491	long-range	gene	ACSL3	protein_coding
DEL	14389	2491	long-range	transcript	ACSL3	protein_coding
INS	14390	11	below_50bp	gene	ACSL3	protein_coding
INS	14390	11	below_50bp	transcript	ACSL3	protein_coding
INS	14390	11	below_50bp	gene	ACSL3	protein_coding
INS	14390	11	below_50bp	transcript	ACSL3	protein_coding
DEL	14391	317	structural_to_1kb	transcript	ACSL3	protein_coding
DEL	14391	317	structural_to_1kb	gene	ACSL3	protein_coding
DEL	14391	317	structural_to_1kb	transcript	ACSL3	protein_coding
DEL	14391	317	structural_to_1kb	gene	ACSL3	protein_coding
DEL	14391	317	structural_to_1kb	transcript	ACSL3	protein_coding
DEL	15400	161012325	long-range	transcript	MECOM	protein_coding
DEL	15400	161012325	long-range	gene	MECOM	protein_coding
DEL	15400	161012325	long-range	transcript	MECOM	protein_coding
DEL	15432	10	below_50bp	transcript	SRGAP3	protein_coding
DEL	15432	10	below_50bp	gene	SRGAP3	protein_coding
DEL	15432	10	below_50bp	transcript	SRGAP3	protein_coding
DEL	15432	10	below_50bp	gene	SRGAP3	protein_coding
DEL	15432	10	below_50bp	transcript	SRGAP3	protein_coding
INS	15434	716	structural_to_1kb	gene	SRGAP3	protein_coding
INS	15434	716	structural_to_1kb	transcript	SRGAP3	protein_coding
INS	15434	716	structural_to_1kb	gene	SRGAP3	protein_coding
INS	15434	716	structural_to_1kb	transcript	SRGAP3	protein_coding
INS	15448	207	structural_to_1kb	transcript	FANCD2	protein_coding
INS	15448	207	structural_to_1kb	gene	FANCD2	protein_coding
INS	15448	207	structural_to_1kb	transcript	FANCD2	protein_coding
INS	15448	207	structural_to_1kb	gene	FANCD2	protein_coding
INS	15448	207	structural_to_1kb	transcript	FANCD2	protein_coding
DEL	15475	19	below_50bp	transcript	PPARG	protein_coding
DEL	15475	19	below_50bp	gene	PPARG	protein_coding
DEL	15475	19	below_50bp	transcript	PPARG	protein_coding
DEL	15475	19	below_50bp	gene	PPARG	protein_coding
DEL	15475	19	below_50bp	transcript	PPARG	protein_coding
DEL	15478	22	below_50bp	gene	RAF1	protein_coding
DEL	15478	22	below_50bp	transcript	RAF1	protein_coding
DEL	15478	22	below_50bp	gene	RAF1	protein_coding
DEL	15478	22	below_50bp	transcript	RAF1	protein_coding
DEL	15479	13	below_50bp	gene	RAF1	protein_coding
DEL	15479	13	below_50bp	transcript	RAF1	protein_coding
DEL	15479	13	below_50bp	gene	RAF1	protein_coding
DEL	15479	13	below_50bp	transcript	RAF1	protein_coding
INS	15481	10	below_50bp	gene	RAF1	protein_coding
INS	15481	10	below_50bp	transcript	RAF1	protein_coding
INS	15481	10	below_50bp	gene	RAF1	protein_coding
INS	15481	10	below_50bp	transcript	RAF1	protein_coding
DEL	15482	18	below_50bp	gene	RAF1	protein_coding
DEL	15482	18	below_50bp	transcript	RAF1	protein_coding
DEL	15482	18	below_50bp	gene	RAF1	protein_coding
DEL	15482	18	below_50bp	transcript	RAF1	protein_coding
DEL	15529	78	structural_to_1kb	gene	XPC	protein_coding
DEL	15529	78	structural_to_1kb	transcript	XPC	protein_coding
DEL	15529	78	structural_to_1kb	gene	XPC	protein_coding
DEL	15529	78	structural_to_1kb	transcript	XPC	protein_coding
DEL	15993	21	below_50bp	gene	TGFBR2	protein_coding
DEL	15993	21	below_50bp	transcript	TGFBR2	protein_coding
DEL	15993	21	below_50bp	gene	TGFBR2	protein_coding
DEL	15993	21	below_50bp	transcript	TGFBR2	protein_coding
DEL	15994	10	below_50bp	gene	TGFBR2	protein_coding
DEL	15994	10	below_50bp	transcript	TGFBR2	protein_coding
DEL	15994	10	below_50bp	gene	TGFBR2	protein_coding
DEL	15994	10	below_50bp	transcript	TGFBR2	protein_coding
DEL	16227	46	below_50bp	transcript	MLH1	protein_coding
DEL	16227	46	below_50bp	gene	MLH1	protein_coding
DEL	16227	46	below_50bp	transcript	MLH1	protein_coding
DEL	16227	46	below_50bp	gene	MLH1	protein_coding
DEL	16227	46	below_50bp	transcript	MLH1	protein_coding
DEL	16228	10	below_50bp	transcript	MLH1	protein_coding
DEL	16228	10	below_50bp	gene	MLH1	protein_coding
DEL	16228	10	below_50bp	transcript	MLH1	protein_coding
DEL	16228	10	below_50bp	gene	MLH1	protein_coding
DEL	16228	10	below_50bp	transcript	MLH1	protein_coding
DEL	16502	12	below_50bp	transcript	SETD2	protein_coding
DEL	16502	12	below_50bp	gene	SETD2	protein_coding
DEL	16502	12	below_50bp	transcript	SETD2	protein_coding
DEL	16502	12	below_50bp	gene	SETD2	protein_coding
DEL	16502	12	below_50bp	transcript	SETD2	protein_coding
INS	16503	15	below_50bp	transcript	SETD2	protein_coding
INS	16503	15	below_50bp	gene	SETD2	protein_coding
INS	16503	15	below_50bp	transcript	SETD2	protein_coding
INS	16503	15	below_50bp	gene	SETD2	protein_coding
INS	16503	15	below_50bp	transcript	SETD2	protein_coding
INS	16505	32	below_50bp	transcript	SETD2	protein_coding
INS	16505	32	below_50bp	gene	SETD2	protein_coding
INS	16505	32	below_50bp	transcript	SETD2	protein_coding
INS	16505	32	below_50bp	gene	SETD2	protein_coding
INS	16505	32	below_50bp	transcript	SETD2	protein_coding
DEL	16506	12	below_50bp	transcript	SETD2	protein_coding
DEL	16506	12	below_50bp	gene	SETD2	protein_coding
DEL	16506	12	below_50bp	transcript	SETD2	protein_coding
DEL	16506	12	below_50bp	gene	SETD2	protein_coding
DEL	16506	12	below_50bp	transcript	SETD2	protein_coding
DEL	16545	12	below_50bp	gene	RHOA	protein_coding
DEL	16545	12	below_50bp	transcript	RHOA	protein_coding
DEL	16545	12	below_50bp	gene	RHOA	protein_coding
DEL	16545	12	below_50bp	transcript	RHOA	protein_coding
DEL	16546	10	below_50bp	gene	RHOA	protein_coding
DEL	16546	10	below_50bp	transcript	RHOA	protein_coding
DEL	16546	10	below_50bp	gene	RHOA	protein_coding
DEL	16546	10	below_50bp	transcript	RHOA	protein_coding
DEL	16547	11	below_50bp	gene	RHOA	protein_coding
DEL	16547	11	below_50bp	transcript	RHOA	protein_coding
DEL	16547	11	below_50bp	gene	RHOA	protein_coding
DEL	16547	11	below_50bp	transcript	RHOA	protein_coding
INS	16548	688	structural_to_1kb	gene	RHOA	protein_coding
INS	16548	688	structural_to_1kb	transcript	RHOA	protein_coding
INS	16548	688	structural_to_1kb	gene	RHOA	protein_coding
INS	16548	688	structural_to_1kb	transcript	RHOA	protein_coding
INS	16549	15	below_50bp	gene	RHOA	protein_coding
INS	16549	15	below_50bp	transcript	RHOA	protein_coding
INS	16549	15	below_50bp	gene	RHOA	protein_coding
INS	16549	15	below_50bp	transcript	RHOA	protein_coding
DEL	16604	391704	long-range	transcript	PBRM1	protein_coding
DEL	16604	391704	long-range	gene	PBRM1	protein_coding
DEL	16604	391704	long-range	transcript	PBRM1	protein_coding
INS	16624	20	below_50bp	gene	CACNA1D	protein_coding
INS	16624	20	below_50bp	transcript	CACNA1D	protein_coding
INS	16624	20	below_50bp	gene	CACNA1D	protein_coding
INS	16624	20	below_50bp	transcript	CACNA1D	protein_coding
DEL	16625	11	below_50bp	gene	CACNA1D	protein_coding
DEL	16625	11	below_50bp	transcript	CACNA1D	protein_coding
DEL	16625	11	below_50bp	gene	CACNA1D	protein_coding
DEL	16625	11	below_50bp	transcript	CACNA1D	protein_coding
INS	16626	18	below_50bp	transcript	CACNA1D	protein_coding
INS	16626	18	below_50bp	gene	CACNA1D	protein_coding
INS	16626	18	below_50bp	transcript	CACNA1D	protein_coding
INS	16626	18	below_50bp	gene	CACNA1D	protein_coding
INS	16626	18	below_50bp	transcript	CACNA1D	protein_coding
DEL	16762	34	below_50bp	gene	FHIT	protein_coding
DEL	16762	34	below_50bp	transcript	FHIT	protein_coding
DEL	16762	34	below_50bp	gene	FHIT	protein_coding
DEL	16762	34	below_50bp	transcript	FHIT	protein_coding
INS	16763	14	below_50bp	gene	FHIT	protein_coding
INS	16763	14	below_50bp	transcript	FHIT	protein_coding
INS	16763	14	below_50bp	gene	FHIT	protein_coding
INS	16763	14	below_50bp	transcript	FHIT	protein_coding
DEL	16764	60	structural_to_1kb	gene	FHIT	protein_coding
DEL	16764	60	structural_to_1kb	transcript	FHIT	protein_coding
DEL	16764	60	structural_to_1kb	gene	FHIT	protein_coding
DEL	16764	60	structural_to_1kb	transcript	FHIT	protein_coding
INS	16766	967	structural_to_1kb	gene	FHIT	protein_coding
INS	16766	967	structural_to_1kb	transcript	FHIT	protein_coding
INS	16766	967	structural_to_1kb	gene	FHIT	protein_coding
INS	16766	967	structural_to_1kb	transcript	FHIT	protein_coding
INS	16767	11	below_50bp	gene	FHIT	protein_coding
INS	16767	11	below_50bp	transcript	FHIT	protein_coding
INS	16767	11	below_50bp	gene	FHIT	protein_coding
INS	16767	11	below_50bp	transcript	FHIT	protein_coding
INS	16768	130	structural_to_1kb	gene	FHIT	protein_coding
INS	16768	130	structural_to_1kb	transcript	FHIT	protein_coding
INS	16768	130	structural_to_1kb	gene	FHIT	protein_coding
INS	16768	130	structural_to_1kb	transcript	FHIT	protein_coding
DEL	16769	28	below_50bp	gene	FHIT	protein_coding
DEL	16769	28	below_50bp	transcript	FHIT	protein_coding
DEL	16769	28	below_50bp	gene	FHIT	protein_coding
DEL	16769	28	below_50bp	transcript	FHIT	protein_coding
INS	16770	427	structural_to_1kb	gene	FHIT	protein_coding
INS	16770	427	structural_to_1kb	transcript	FHIT	protein_coding
INS	16770	427	structural_to_1kb	gene	FHIT	protein_coding
INS	16770	427	structural_to_1kb	transcript	FHIT	protein_coding
DEL	16771	17	below_50bp	gene	FHIT	protein_coding
DEL	16771	17	below_50bp	transcript	FHIT	protein_coding
DEL	16771	17	below_50bp	gene	FHIT	protein_coding
DEL	16771	17	below_50bp	transcript	FHIT	protein_coding
INS	16772	11	below_50bp	gene	FHIT	protein_coding
INS	16772	11	below_50bp	transcript	FHIT	protein_coding
INS	16772	11	below_50bp	gene	FHIT	protein_coding
INS	16772	11	below_50bp	transcript	FHIT	protein_coding
INS	16774	12	below_50bp	gene	FHIT	protein_coding
INS	16774	12	below_50bp	transcript	FHIT	protein_coding
INS	16774	12	below_50bp	gene	FHIT	protein_coding
INS	16774	12	below_50bp	transcript	FHIT	protein_coding
DEL	16775	13	below_50bp	gene	FHIT	protein_coding
DEL	16775	13	below_50bp	transcript	FHIT	protein_coding
DEL	16775	13	below_50bp	gene	FHIT	protein_coding
DEL	16775	13	below_50bp	transcript	FHIT	protein_coding
INS	16776	24	below_50bp	gene	FHIT	protein_coding
INS	16776	24	below_50bp	transcript	FHIT	protein_coding
INS	16776	24	below_50bp	gene	FHIT	protein_coding
INS	16776	24	below_50bp	transcript	FHIT	protein_coding
INS	16777	34	below_50bp	gene	FHIT	protein_coding
INS	16777	34	below_50bp	transcript	FHIT	protein_coding
INS	16777	34	below_50bp	gene	FHIT	protein_coding
INS	16777	34	below_50bp	transcript	FHIT	protein_coding
DEL	16778	12	below_50bp	gene	FHIT	protein_coding
DEL	16778	12	below_50bp	transcript	FHIT	protein_coding
DEL	16778	12	below_50bp	gene	FHIT	protein_coding
DEL	16778	12	below_50bp	transcript	FHIT	protein_coding
DEL	16779	20	below_50bp	gene	FHIT	protein_coding
DEL	16779	20	below_50bp	transcript	FHIT	protein_coding
DEL	16779	20	below_50bp	gene	FHIT	protein_coding
DEL	16779	20	below_50bp	transcript	FHIT	protein_coding
INS	16780	10	below_50bp	gene	FHIT	protein_coding
INS	16780	10	below_50bp	transcript	FHIT	protein_coding
INS	16780	10	below_50bp	gene	FHIT	protein_coding
INS	16780	10	below_50bp	transcript	FHIT	protein_coding
DEL	16782	12	below_50bp	gene	FHIT	protein_coding
DEL	16782	12	below_50bp	transcript	FHIT	protein_coding
DEL	16782	12	below_50bp	gene	FHIT	protein_coding
DEL	16782	12	below_50bp	transcript	FHIT	protein_coding
INS	16783	12	below_50bp	gene	FHIT	protein_coding
INS	16783	12	below_50bp	transcript	FHIT	protein_coding
INS	16783	12	below_50bp	gene	FHIT	protein_coding
INS	16783	12	below_50bp	transcript	FHIT	protein_coding
INS	16784	15	below_50bp	gene	FHIT	protein_coding
INS	16784	15	below_50bp	transcript	FHIT	protein_coding
INS	16784	15	below_50bp	gene	FHIT	protein_coding
INS	16784	15	below_50bp	transcript	FHIT	protein_coding
INS	16785	11	below_50bp	gene	FHIT	protein_coding
INS	16785	11	below_50bp	transcript	FHIT	protein_coding
INS	16785	11	below_50bp	gene	FHIT	protein_coding
INS	16785	11	below_50bp	transcript	FHIT	protein_coding
INS	16787	1061	long-range	gene	FHIT	protein_coding
INS	16787	1061	long-range	transcript	FHIT	protein_coding
INS	16787	1061	long-range	gene	FHIT	protein_coding
INS	16787	1061	long-range	transcript	FHIT	protein_coding
INS	16788	10	below_50bp	gene	FHIT	protein_coding
INS	16788	10	below_50bp	transcript	FHIT	protein_coding
INS	16788	10	below_50bp	gene	FHIT	protein_coding
INS	16788	10	below_50bp	transcript	FHIT	protein_coding
INS	16789	10	below_50bp	gene	FHIT	protein_coding
INS	16789	10	below_50bp	transcript	FHIT	protein_coding
INS	16789	10	below_50bp	gene	FHIT	protein_coding
INS	16789	10	below_50bp	transcript	FHIT	protein_coding
INS	16790	50	structural_to_1kb	gene	FHIT	protein_coding
INS	16790	50	structural_to_1kb	transcript	FHIT	protein_coding
INS	16790	50	structural_to_1kb	gene	FHIT	protein_coding
INS	16790	50	structural_to_1kb	transcript	FHIT	protein_coding
INS	16791	11	below_50bp	gene	FHIT	protein_coding
INS	16791	11	below_50bp	transcript	FHIT	protein_coding
INS	16791	11	below_50bp	gene	FHIT	protein_coding
INS	16791	11	below_50bp	transcript	FHIT	protein_coding
DEL	16792	11	below_50bp	gene	FHIT	protein_coding
DEL	16792	11	below_50bp	transcript	FHIT	protein_coding
DEL	16792	11	below_50bp	gene	FHIT	protein_coding
DEL	16792	11	below_50bp	transcript	FHIT	protein_coding
INS	16793	318	structural_to_1kb	gene	FHIT	protein_coding
INS	16793	318	structural_to_1kb	transcript	FHIT	protein_coding
INS	16793	318	structural_to_1kb	gene	FHIT	protein_coding
INS	16793	318	structural_to_1kb	transcript	FHIT	protein_coding
INS	16794	572	structural_to_1kb	gene	FHIT	protein_coding
INS	16794	572	structural_to_1kb	transcript	FHIT	protein_coding
INS	16794	572	structural_to_1kb	gene	FHIT	protein_coding
INS	16794	572	structural_to_1kb	transcript	FHIT	protein_coding
DEL	16795	22	below_50bp	gene	FHIT	protein_coding
DEL	16795	22	below_50bp	transcript	FHIT	protein_coding
DEL	16795	22	below_50bp	gene	FHIT	protein_coding
DEL	16795	22	below_50bp	transcript	FHIT	protein_coding
INS	16796	59	structural_to_1kb	gene	FHIT	protein_coding
INS	16796	59	structural_to_1kb	transcript	FHIT	protein_coding
INS	16796	59	structural_to_1kb	gene	FHIT	protein_coding
INS	16796	59	structural_to_1kb	transcript	FHIT	protein_coding
DEL	16797	992	structural_to_1kb	gene	FHIT	protein_coding
DEL	16797	992	structural_to_1kb	transcript	FHIT	protein_coding
DEL	16797	992	structural_to_1kb	gene	FHIT	protein_coding
DEL	16797	992	structural_to_1kb	transcript	FHIT	protein_coding
DEL	16965	24	below_50bp	gene	MITF	protein_coding
DEL	16965	24	below_50bp	transcript	MITF	protein_coding
DEL	16965	24	below_50bp	gene	MITF	protein_coding
DEL	16965	24	below_50bp	transcript	MITF	protein_coding
DEL	16966	10	below_50bp	gene	MITF	protein_coding
DEL	16966	10	below_50bp	transcript	MITF	protein_coding
DEL	16966	10	below_50bp	gene	MITF	protein_coding
DEL	16966	10	below_50bp	transcript	MITF	protein_coding
DEL	16976	32	below_50bp	transcript	FOXP1	protein_coding
DEL	16976	32	below_50bp	gene	FOXP1	protein_coding
DEL	16976	32	below_50bp	transcript	FOXP1	protein_coding
DEL	16976	32	below_50bp	gene	FOXP1	protein_coding
DEL	16976	32	below_50bp	transcript	FOXP1	protein_coding
INS	16977	10	below_50bp	transcript	FOXP1	protein_coding
INS	16977	10	below_50bp	gene	FOXP1	protein_coding
INS	16977	10	below_50bp	transcript	FOXP1	protein_coding
INS	16977	10	below_50bp	gene	FOXP1	protein_coding
INS	16977	10	below_50bp	transcript	FOXP1	protein_coding
INS	16978	16	below_50bp	transcript	FOXP1	protein_coding
INS	16978	16	below_50bp	gene	FOXP1	protein_coding
INS	16978	16	below_50bp	transcript	FOXP1	protein_coding
INS	16978	16	below_50bp	gene	FOXP1	protein_coding
INS	16978	16	below_50bp	transcript	FOXP1	protein_coding
INS	16979	26	below_50bp	transcript	FOXP1	protein_coding
INS	16979	26	below_50bp	gene	FOXP1	protein_coding
INS	16979	26	below_50bp	transcript	FOXP1	protein_coding
INS	16979	26	below_50bp	gene	FOXP1	protein_coding
INS	16979	26	below_50bp	transcript	FOXP1	protein_coding
INS	16980	15	below_50bp	transcript	FOXP1	protein_coding
INS	16980	15	below_50bp	gene	FOXP1	protein_coding
INS	16980	15	below_50bp	transcript	FOXP1	protein_coding
INS	16980	15	below_50bp	gene	FOXP1	protein_coding
INS	16980	15	below_50bp	transcript	FOXP1	protein_coding
INS	16981	11	below_50bp	transcript	FOXP1	protein_coding
INS	16981	11	below_50bp	gene	FOXP1	protein_coding
INS	16981	11	below_50bp	transcript	FOXP1	protein_coding
INS	16981	11	below_50bp	gene	FOXP1	protein_coding
INS	16981	11	below_50bp	transcript	FOXP1	protein_coding
INS	16982	23	below_50bp	transcript	FOXP1	protein_coding
INS	16982	23	below_50bp	gene	FOXP1	protein_coding
INS	16982	23	below_50bp	transcript	FOXP1	protein_coding
INS	16982	23	below_50bp	gene	FOXP1	protein_coding
INS	16982	23	below_50bp	transcript	FOXP1	protein_coding
DEL	16983	16	below_50bp	transcript	FOXP1	protein_coding
DEL	16983	16	below_50bp	gene	FOXP1	protein_coding
DEL	16983	16	below_50bp	transcript	FOXP1	protein_coding
DEL	16983	16	below_50bp	gene	FOXP1	protein_coding
DEL	16983	16	below_50bp	transcript	FOXP1	protein_coding
DEL	16984	19	below_50bp	transcript	FOXP1	protein_coding
DEL	16984	19	below_50bp	gene	FOXP1	protein_coding
DEL	16984	19	below_50bp	transcript	FOXP1	protein_coding
DEL	16984	19	below_50bp	gene	FOXP1	protein_coding
DEL	16984	19	below_50bp	transcript	FOXP1	protein_coding
DEL	16985	299	structural_to_1kb	transcript	FOXP1	protein_coding
DEL	16985	299	structural_to_1kb	gene	FOXP1	protein_coding
DEL	16985	299	structural_to_1kb	transcript	FOXP1	protein_coding
DEL	16985	299	structural_to_1kb	gene	FOXP1	protein_coding
DEL	16985	299	structural_to_1kb	transcript	FOXP1	protein_coding
INS	16986	10	below_50bp	transcript	FOXP1	protein_coding
INS	16986	10	below_50bp	gene	FOXP1	protein_coding
INS	16986	10	below_50bp	transcript	FOXP1	protein_coding
INS	16986	10	below_50bp	gene	FOXP1	protein_coding
INS	16986	10	below_50bp	transcript	FOXP1	protein_coding
DEL	16987	11	below_50bp	transcript	FOXP1	protein_coding
DEL	16987	11	below_50bp	gene	FOXP1	protein_coding
DEL	16987	11	below_50bp	transcript	FOXP1	protein_coding
DEL	16987	11	below_50bp	gene	FOXP1	protein_coding
DEL	16987	11	below_50bp	transcript	FOXP1	protein_coding
INS	16989	247	structural_to_1kb	transcript	FOXP1	protein_coding
INS	16989	247	structural_to_1kb	gene	FOXP1	protein_coding
INS	16989	247	structural_to_1kb	transcript	FOXP1	protein_coding
INS	16989	247	structural_to_1kb	gene	FOXP1	protein_coding
INS	16989	247	structural_to_1kb	transcript	FOXP1	protein_coding
DEL	16990	12	below_50bp	gene	FOXP1	protein_coding
DEL	16990	12	below_50bp	transcript	FOXP1	protein_coding
DEL	16990	12	below_50bp	gene	FOXP1	protein_coding
DEL	16990	12	below_50bp	transcript	FOXP1	protein_coding
INS	16991	244	structural_to_1kb	gene	FOXP1	protein_coding
INS	16991	244	structural_to_1kb	transcript	FOXP1	protein_coding
INS	16991	244	structural_to_1kb	gene	FOXP1	protein_coding
INS	16991	244	structural_to_1kb	transcript	FOXP1	protein_coding
INS	16993	32	below_50bp	gene	FOXP1	protein_coding
INS	16993	32	below_50bp	transcript	FOXP1	protein_coding
INS	16993	32	below_50bp	gene	FOXP1	protein_coding
INS	16993	32	below_50bp	transcript	FOXP1	protein_coding
DEL	16994	12	below_50bp	gene	FOXP1	protein_coding
DEL	16994	12	below_50bp	transcript	FOXP1	protein_coding
DEL	16994	12	below_50bp	gene	FOXP1	protein_coding
DEL	16994	12	below_50bp	transcript	FOXP1	protein_coding
INS	16995	18	below_50bp	transcript	FOXP1	protein_coding
INS	16995	18	below_50bp	gene	FOXP1	protein_coding
INS	16995	18	below_50bp	transcript	FOXP1	protein_coding
INS	16995	18	below_50bp	gene	FOXP1	protein_coding
INS	16995	18	below_50bp	transcript	FOXP1	protein_coding
INS	16996	335	structural_to_1kb	transcript	FOXP1	protein_coding
INS	16996	335	structural_to_1kb	gene	FOXP1	protein_coding
INS	16996	335	structural_to_1kb	transcript	FOXP1	protein_coding
INS	16996	335	structural_to_1kb	gene	FOXP1	protein_coding
INS	16996	335	structural_to_1kb	transcript	FOXP1	protein_coding
DEL	16997	20	below_50bp	transcript	FOXP1	protein_coding
DEL	16997	20	below_50bp	gene	FOXP1	protein_coding
DEL	16997	20	below_50bp	transcript	FOXP1	protein_coding
DEL	16997	20	below_50bp	gene	FOXP1	protein_coding
DEL	16997	20	below_50bp	transcript	FOXP1	protein_coding
INS	17615	76	structural_to_1kb	gene	CBLB	protein_coding
INS	17615	76	structural_to_1kb	transcript	CBLB	protein_coding
INS	17615	76	structural_to_1kb	gene	CBLB	protein_coding
INS	17615	76	structural_to_1kb	transcript	CBLB	protein_coding
INS	17616	15	below_50bp	gene	CBLB	protein_coding
INS	17616	15	below_50bp	transcript	CBLB	protein_coding
INS	17616	15	below_50bp	gene	CBLB	protein_coding
INS	17616	15	below_50bp	transcript	CBLB	protein_coding
INS	17617	18	below_50bp	gene	CBLB	protein_coding
INS	17617	18	below_50bp	transcript	CBLB	protein_coding
INS	17617	18	below_50bp	gene	CBLB	protein_coding
INS	17617	18	below_50bp	transcript	CBLB	protein_coding
INS	17618	12	below_50bp	gene	CBLB	protein_coding
INS	17618	12	below_50bp	transcript	CBLB	protein_coding
INS	17618	12	below_50bp	gene	CBLB	protein_coding
INS	17618	12	below_50bp	transcript	CBLB	protein_coding
INS	18094	326	structural_to_1kb	gene	RPN1	protein_coding
INS	18094	326	structural_to_1kb	transcript	RPN1	protein_coding
INS	18094	326	structural_to_1kb	gene	RPN1	protein_coding
INS	18094	326	structural_to_1kb	transcript	RPN1	protein_coding
DEL	18404	35789600	long-range	gene	ATR	protein_coding
DEL	18404	35789600	long-range	transcript	ATR	protein_coding
INS	18566	12	below_50bp	transcript	WWTR1	protein_coding
INS	18566	12	below_50bp	gene	WWTR1	protein_coding
INS	18566	12	below_50bp	transcript	WWTR1	protein_coding
INS	18566	12	below_50bp	gene	WWTR1	protein_coding
INS	18566	12	below_50bp	transcript	WWTR1	protein_coding
INS	18567	13	below_50bp	gene	WWTR1	protein_coding
INS	18567	13	below_50bp	transcript	WWTR1	protein_coding
INS	18567	13	below_50bp	gene	WWTR1	protein_coding
INS	18567	13	below_50bp	transcript	WWTR1	protein_coding
INS	18568	10	below_50bp	gene	WWTR1	protein_coding
INS	18568	10	below_50bp	transcript	WWTR1	protein_coding
INS	18568	10	below_50bp	gene	WWTR1	protein_coding
INS	18568	10	below_50bp	transcript	WWTR1	protein_coding
INS	18569	15	below_50bp	transcript	WWTR1	protein_coding
INS	18569	15	below_50bp	gene	WWTR1	protein_coding
INS	18569	15	below_50bp	transcript	WWTR1	protein_coding
INS	18569	15	below_50bp	gene	WWTR1	protein_coding
INS	18569	15	below_50bp	transcript	WWTR1	protein_coding
INS	18570	13	below_50bp	gene	WWTR1	protein_coding
INS	18570	13	below_50bp	transcript	WWTR1	protein_coding
INS	18570	13	below_50bp	gene	WWTR1	protein_coding
INS	18570	13	below_50bp	transcript	WWTR1	protein_coding
INS	18571	16	below_50bp	exon	WWTR1	protein_coding
INS	18571	16	below_50bp	gene	WWTR1	protein_coding
INS	18571	16	below_50bp	transcript	WWTR1	protein_coding
INS	18571	16	below_50bp	exon	WWTR1	protein_coding
INS	18571	16	below_50bp	gene	WWTR1	protein_coding
INS	18571	16	below_50bp	transcript	WWTR1	protein_coding
INS	18572	13	below_50bp	gene	WWTR1	protein_coding
INS	18572	13	below_50bp	transcript	WWTR1	protein_coding
INS	18572	13	below_50bp	gene	WWTR1	protein_coding
INS	18572	13	below_50bp	transcript	WWTR1	protein_coding
INS	18751	14	below_50bp	gene	GMPS	protein_coding
INS	18751	14	below_50bp	transcript	GMPS	protein_coding
INS	18751	14	below_50bp	gene	GMPS	protein_coding
INS	18751	14	below_50bp	transcript	GMPS	protein_coding
INS	18829	10	below_50bp	gene	MLF1	protein_coding
INS	18829	10	below_50bp	transcript	MLF1	protein_coding
INS	18829	10	below_50bp	gene	MLF1	protein_coding
INS	18829	10	below_50bp	transcript	MLF1	protein_coding
DEL	18830	12	below_50bp	gene	MLF1	protein_coding
DEL	18830	12	below_50bp	transcript	MLF1	protein_coding
DEL	18830	12	below_50bp	gene	MLF1	protein_coding
DEL	18830	12	below_50bp	transcript	MLF1	protein_coding
INS	19113	13	below_50bp	gene	MECOM	protein_coding
INS	19113	13	below_50bp	transcript	MECOM	protein_coding
INS	19113	13	below_50bp	gene	MECOM	protein_coding
INS	19113	13	below_50bp	transcript	MECOM	protein_coding
INS	19114	12	below_50bp	transcript	MECOM	protein_coding
INS	19114	12	below_50bp	gene	MECOM	protein_coding
INS	19114	12	below_50bp	transcript	MECOM	protein_coding
INS	19114	12	below_50bp	gene	MECOM	protein_coding
INS	19114	12	below_50bp	transcript	MECOM	protein_coding
INS	19115	20	below_50bp	transcript	MECOM	protein_coding
INS	19115	20	below_50bp	gene	MECOM	protein_coding
INS	19115	20	below_50bp	transcript	MECOM	protein_coding
INS	19115	20	below_50bp	gene	MECOM	protein_coding
INS	19115	20	below_50bp	transcript	MECOM	protein_coding
DEL	19116	19	below_50bp	transcript	MECOM	protein_coding
DEL	19116	19	below_50bp	gene	MECOM	protein_coding
DEL	19116	19	below_50bp	transcript	MECOM	protein_coding
DEL	19116	19	below_50bp	gene	MECOM	protein_coding
DEL	19116	19	below_50bp	transcript	MECOM	protein_coding
DEL	19117	11	below_50bp	transcript	MECOM	protein_coding
DEL	19117	11	below_50bp	gene	MECOM	protein_coding
DEL	19117	11	below_50bp	transcript	MECOM	protein_coding
DEL	19117	11	below_50bp	gene	MECOM	protein_coding
DEL	19117	11	below_50bp	transcript	MECOM	protein_coding
DEL	19118	26	below_50bp	transcript	MECOM	protein_coding
DEL	19118	26	below_50bp	gene	MECOM	protein_coding
DEL	19118	26	below_50bp	transcript	MECOM	protein_coding
DEL	19118	26	below_50bp	gene	MECOM	protein_coding
DEL	19118	26	below_50bp	transcript	MECOM	protein_coding
DEL	19119	11	below_50bp	transcript	MECOM	protein_coding
DEL	19119	11	below_50bp	gene	MECOM	protein_coding
DEL	19119	11	below_50bp	transcript	MECOM	protein_coding
DEL	19119	11	below_50bp	gene	MECOM	protein_coding
DEL	19119	11	below_50bp	transcript	MECOM	protein_coding
DEL	19122	12	below_50bp	transcript	MECOM	protein_coding
DEL	19122	12	below_50bp	gene	MECOM	protein_coding
DEL	19122	12	below_50bp	transcript	MECOM	protein_coding
DEL	19122	12	below_50bp	gene	MECOM	protein_coding
DEL	19122	12	below_50bp	transcript	MECOM	protein_coding
DEL	19125	72	structural_to_1kb	transcript	MECOM	protein_coding
DEL	19125	72	structural_to_1kb	gene	MECOM	protein_coding
DEL	19125	72	structural_to_1kb	transcript	MECOM	protein_coding
DEL	19125	72	structural_to_1kb	gene	MECOM	protein_coding
DEL	19125	72	structural_to_1kb	transcript	MECOM	protein_coding
DEL	19126	10	below_50bp	transcript	MECOM	protein_coding
DEL	19126	10	below_50bp	gene	MECOM	protein_coding
DEL	19126	10	below_50bp	transcript	MECOM	protein_coding
DEL	19126	10	below_50bp	gene	MECOM	protein_coding
DEL	19126	10	below_50bp	transcript	MECOM	protein_coding
INS	19127	11	below_50bp	transcript	MECOM	protein_coding
INS	19127	11	below_50bp	gene	MECOM	protein_coding
INS	19127	11	below_50bp	transcript	MECOM	protein_coding
INS	19127	11	below_50bp	gene	MECOM	protein_coding
INS	19127	11	below_50bp	transcript	MECOM	protein_coding
INS	19128	12	below_50bp	transcript	MECOM	protein_coding
INS	19128	12	below_50bp	gene	MECOM	protein_coding
INS	19128	12	below_50bp	transcript	MECOM	protein_coding
INS	19128	12	below_50bp	gene	MECOM	protein_coding
INS	19128	12	below_50bp	transcript	MECOM	protein_coding
INS	19129	10	below_50bp	transcript	MECOM	protein_coding
INS	19129	10	below_50bp	gene	MECOM	protein_coding
INS	19129	10	below_50bp	transcript	MECOM	protein_coding
INS	19129	10	below_50bp	gene	MECOM	protein_coding
INS	19129	10	below_50bp	transcript	MECOM	protein_coding
INS	19130	11	below_50bp	transcript	MECOM	protein_coding
INS	19130	11	below_50bp	gene	MECOM	protein_coding
INS	19130	11	below_50bp	transcript	MECOM	protein_coding
INS	19130	11	below_50bp	gene	MECOM	protein_coding
INS	19130	11	below_50bp	transcript	MECOM	protein_coding
DEL	19400	15	below_50bp	gene	TBL1XR1	protein_coding
DEL	19400	15	below_50bp	transcript	TBL1XR1	protein_coding
DEL	19400	15	below_50bp	gene	TBL1XR1	protein_coding
DEL	19400	15	below_50bp	transcript	TBL1XR1	protein_coding
INS	19401	23	below_50bp	gene	TBL1XR1	protein_coding
INS	19401	23	below_50bp	transcript	TBL1XR1	protein_coding
INS	19401	23	below_50bp	gene	TBL1XR1	protein_coding
INS	19401	23	below_50bp	transcript	TBL1XR1	protein_coding
INS	19402	19	below_50bp	gene	TBL1XR1	protein_coding
INS	19402	19	below_50bp	transcript	TBL1XR1	protein_coding
INS	19402	19	below_50bp	gene	TBL1XR1	protein_coding
INS	19402	19	below_50bp	transcript	TBL1XR1	protein_coding
INS	19403	15	below_50bp	gene	TBL1XR1	protein_coding
INS	19403	15	below_50bp	transcript	TBL1XR1	protein_coding
INS	19403	15	below_50bp	gene	TBL1XR1	protein_coding
INS	19403	15	below_50bp	transcript	TBL1XR1	protein_coding
INS	19404	13	below_50bp	gene	TBL1XR1	protein_coding
INS	19404	13	below_50bp	transcript	TBL1XR1	protein_coding
INS	19404	13	below_50bp	gene	TBL1XR1	protein_coding
INS	19404	13	below_50bp	transcript	TBL1XR1	protein_coding
DEL	19405	19	below_50bp	gene	TBL1XR1	protein_coding
DEL	19405	19	below_50bp	transcript	TBL1XR1	protein_coding
DEL	19405	19	below_50bp	gene	TBL1XR1	protein_coding
DEL	19405	19	below_50bp	transcript	TBL1XR1	protein_coding
DEL	19695	323	structural_to_1kb	transcript	MAP3K13	protein_coding
DEL	19695	323	structural_to_1kb	gene	MAP3K13	protein_coding
[truncated: 5,812 more rows]
